# Supplementary material
Source: Springer Nature journal article supplement (https://www.springermedizin.de/resource/supplementary/12885_2010_2842_MOESM6_ESM.pdf/9461990)
Supplement: MOESM6 [file 9461990]

**MAS 5.0 - Genes high or low expressed in TB-interface compared to TA-area and fold change using MAS 5.0**

| <b>Gene</b> | <b>Fold change</b> |
|-------------|--------------------|
| Ibsp        | 7.18387598         |
| Tnfsf11     | 5.29272898         |
| Prm1        | 4.06678931         |
| Mmp13       | 4.0383395          |
| NA          | 4.03646484         |
| Anks1b      | 4.02158092         |
| Ibsp        | 4.01278612         |
| Aftph       | 3.90731419         |
| NA          | 3.83245096         |
| A330021E22R | 3.79710275         |
| A330076H08R | 3.78796221         |
| A730017C20R | 3.78313628         |
| Zic1        | 3.73301077         |
| Drd1a       | 3.66689669         |
| Alpk2       | 3.63979797         |
| NA          | 3.53891773         |
| NA          | 3.48117903         |
| Smoc2       | 3.4281037          |
| 1700063D05R | 3.40678964         |
| Pm20d1      | 3.39134641         |
| NA          | 3.33552969         |
| Kng1        | 3.31400179         |
| Glrb        | 3.29771471         |
| NA          | 3.29732595         |
| Alx1        | 3.29483922         |
| Vcpip1      | 3.24790109         |
| Gucy1a3     | 3.24728714         |
| 2210418O10R | 3.23756785         |
| Gm829       | 3.23070358         |
| Trp53       | 3.22496369         |
| Tmem30b     | 3.20727467         |

|              |            |
|--------------|------------|
| Lrriq3       | 3.20071948 |
| Cyp3a44      | 3.1936776  |
| Nfatc2       | 3.16387146 |
| 9130024F11Ri | 3.16092857 |
| Lmod2        | 3.15975158 |
| Kif5c        | 3.15382648 |
| Col24a1      | 3.14891545 |
| NA           | 3.1451532  |
| NA           | 3.13816784 |
| 1700112C13R  | 3.12053388 |
| Ston1        | 3.11252934 |
| Camk2d       | 3.10366063 |
| Napsa        | 3.089963   |
| NA           | 3.06949293 |
| Pcdhb14      | 3.05245687 |
| Zfp820       | 3.04329668 |
| NA           | 3.0134702  |
| NA           | 2.9979361  |
| Gm7072       | 2.98309562 |
| Tmem202      | 2.96792962 |
| Cgref1       | 2.95442096 |
| 4933400A11R  | 2.95132702 |
| NA           | 2.94152686 |
| 6330407I18Ri | 2.93996057 |
| NA           | 2.9206226  |
| Cacna1s      | 2.90796172 |
| NA           | 2.90774477 |
| BC068157     | 2.90760634 |
| Hoxc5        | 2.90668624 |
| Angptl1      | 2.90608016 |
| D7Erttd715e  | 2.90046048 |
| Ceacam13     | 2.89013901 |
| Cnr1         | 2.88428166 |
| Abca13       | 2.88139384 |

|              |            |
|--------------|------------|
| Zfand5       | 2.87582967 |
| Olah         | 2.86007284 |
| NA           | 2.85640891 |
| Ptx3         | 2.84605394 |
| Chchd7       | 2.84483415 |
| Psmc6        | 2.8415109  |
| D030020J04Ri | 2.84059726 |
| NA           | 2.8331309  |
| Ifitm5       | 2.82352551 |
| 4930473A06R  | 2.81621872 |
| Cox6a2       | 2.8162106  |
| Cgref1       | 2.80304077 |
| NA           | 2.80260978 |
| Smpx         | 2.79856231 |
| Tmod4        | 2.79706205 |
| Col11a1      | 2.79375842 |
| Slfn1        | 2.77870269 |
| 7630402I04Ri | 2.77203038 |
| 1110020G09R  | 2.76952444 |
| NA           | 2.76320747 |
| Grid2        | 2.76306377 |
| Egfr         | 2.76285197 |
| Ptn          | 2.76246012 |
| Mb           | 2.75609593 |
| NA           | 2.75078007 |
| NA           | 2.74980866 |
| Chst9        | 2.74303029 |
| Chsy3        | 2.74141519 |
| Mcpt1        | 2.73838527 |
| NA           | 2.73279958 |
| NA           | 2.72128142 |
| 4930570G19R  | 2.71458704 |
| Ccnb2-ps     | 2.71321445 |
| 4933436I20Ri | 2.71238974 |

|              |            |
|--------------|------------|
| 3110006E14Ri | 2.71144797 |
| NA           | 2.70532466 |
| Ccdc28a      | 2.69914174 |
| NA           | 2.69912459 |
| Rufy2        | 2.68847327 |
| Prss35       | 2.68100985 |
| Luc7l2       | 2.67931989 |
| Pabpc5       | 2.67691969 |
| Ifnab        | 2.6649045  |
| Pfdn5        | 2.65953527 |
| Bmp10        | 2.65709896 |
| Hapln1       | 2.65598776 |
| Slain1       | 2.65206358 |
| NA           | 2.64580418 |
| NA           | 2.64210086 |
| Ccdc77       | 2.6361589  |
| Myst4        | 2.63441726 |
| Gm11992      | 2.63314859 |
| Ptgis        | 2.63012655 |
| Arhgap26     | 2.62281953 |
| Smpd3        | 2.62267502 |
| LOC433197    | 2.62180201 |
| Dzip3        | 2.61920854 |
| A530088H08R  | 2.61187327 |
| D9Erttd12e   | 2.60730004 |
| Mpo          | 2.60307011 |
| D10Erttd494e | 2.60254124 |
| Chic1        | 2.59862903 |
| Ngp          | 2.59652374 |
| 2810449G22R  | 2.59445549 |
| Lonp2        | 2.59384889 |
| Triml1       | 2.59052245 |
| Ckm          | 2.58786603 |
| B230217C12R  | 2.58731923 |

|              |            |
|--------------|------------|
| Col17a1      | 2.58621681 |
| 4933408K01R  | 2.57617021 |
| Dnm1l        | 2.56584283 |
| Tbata        | 2.56482742 |
| NA           | 2.55751922 |
| NA           | 2.55623229 |
| Lrriq3       | 2.55275965 |
| Kif20b       | 2.55232036 |
| Myb          | 2.54351647 |
| 3632451O06R  | 2.54186111 |
| Mphosph8     | 2.54112323 |
| Rpusd2       | 2.54068211 |
| Serpina7     | 2.53932585 |
| Gm266        | 2.53658926 |
| NA           | 2.53385482 |
| Bsnd         | 2.53120435 |
| Mpzl2        | 2.53078053 |
| D030051J21Ri | 2.52842923 |
| Ube2k        | 2.52702196 |
| C79256       | 2.52364664 |
| A630033H20R  | 2.51770605 |
| 4930434E21Ri | 2.51484537 |
| Cecr2        | 2.50948476 |
| Tia1         | 2.50752717 |
| NA           | 2.4997931  |
| Eif3h        | 2.49908239 |
| Col8a1       | 2.49717559 |
| Gabrb2       | 2.49153543 |
| 1110059G02R  | 2.49042362 |
| Plch1        | 2.49027667 |
| Wif1         | 2.48078228 |
| Ptk6         | 2.47775365 |
| AW125646     | 2.47223921 |
| AU022706     | 2.47041679 |

|              |            |
|--------------|------------|
| Slc26a1      | 2.47001239 |
| Neurod4      | 2.46635923 |
| Olf1509      | 2.46456346 |
| NA           | 2.4592951  |
| NA           | 2.45229232 |
| 2810019C22R  | 2.44859613 |
| NA           | 2.44249191 |
| AU021880     | 2.43247544 |
| Tmem100      | 2.42838847 |
| Arhgef7      | 2.42727623 |
| Lrrc6        | 2.4228077  |
| Bnip2        | 2.42197213 |
| NA           | 2.41629686 |
| NA           | 2.41437973 |
| Ccr9         | 2.41419157 |
| Phip         | 2.41261504 |
| Efna2        | 2.41222425 |
| Enpep        | 2.40536631 |
| Asb4         | 2.40358938 |
| Napb         | 2.40306857 |
| Gpr101       | 2.40188875 |
| AU015438     | 2.39986321 |
| 2610037D02R  | 2.39887477 |
| 6720489N17R  | 2.39881715 |
| NA           | 2.38562478 |
| B230117O15R  | 2.38444714 |
| Chmp4c       | 2.38318513 |
| Tcea3        | 2.38058563 |
| Stxbp6       | 2.38031531 |
| 4930442E04Ri | 2.37939513 |
| 4921517L17Ri | 2.37806572 |
| Clca2        | 2.36915235 |
| NA           | 2.36848573 |
| Armc3        | 2.36752746 |

|              |            |
|--------------|------------|
| Clint1       | 2.36614322 |
| 5730526G10R  | 2.36465572 |
| Hoxd4        | 2.36330666 |
| Mup3         | 2.35796604 |
| NA           | 2.35446697 |
| BC068281     | 2.35258732 |
| BC003883     | 2.34996138 |
| Kbtbd7       | 2.34747758 |
| Iyd          | 2.34552146 |
| 1110028C15R  | 2.34268581 |
| NA           | 2.33465379 |
| Sln          | 2.33314583 |
| BB144871     | 2.33277411 |
| Rab40b       | 2.33192572 |
| Syt6         | 2.33028549 |
| 4921507P07Ri | 2.32569298 |
| Hnf4g        | 2.3253743  |
| NA           | 2.32490558 |
| 4930404F17Ri | 2.32333217 |
| Olfr690      | 2.32110839 |
| Cd28         | 2.31818043 |
| Rabgap1      | 2.31795693 |
| D11Erttd326e | 2.317121   |
| Pabpc1l      | 2.31482281 |
| Klhl5        | 2.31460694 |
| 2610001J05Ri | 2.31439377 |
| D430047L21R  | 2.30801825 |
| Slc6a11      | 2.30766209 |
| Ints8        | 2.30239048 |
| Txlnb        | 2.30097297 |
| Ebf3         | 2.3007917  |
| NA           | 2.29863327 |
| BC031781     | 2.29660433 |
| NA           | 2.2965474  |

|           |            |
|-----------|------------|
| Trav12d-1 | 2.29650242 |
| Gpr26     | 2.29322035 |
| NA        | 2.29209189 |
| Lrrn1     | 2.29047203 |
| Ar        | 2.28832341 |
| NA        | 2.28825708 |
| Dsc2      | 2.28799494 |
| NA        | 2.28686749 |
| NA        | 2.28656706 |
| Kalrn     | 2.28486245 |
| Slc7a15   | 2.2833924  |
| NA        | 2.280566   |
| NA        | 2.27988244 |
| Gm2824    | 2.27617052 |
| Gcg       | 2.27612419 |
| NA        | 2.27549163 |
| NA        | 2.27194035 |
| NA        | 2.27028093 |
| NA        | 2.27026069 |
| Rae1      | 2.26978513 |
| Bdkrb2    | 2.26962401 |
| NA        | 2.26477258 |
| Pygm      | 2.2642001  |
| Stxbp4    | 2.26348779 |
| Xiap      | 2.26270215 |
| Zfp558    | 2.26266362 |
| Opcml     | 2.25989984 |
| NA        | 2.25985573 |
| NA        | 2.25670442 |
| NA        | 2.25514623 |
| NA        | 2.25464123 |
| Cd55      | 2.25406555 |
| Zcchc18   | 2.25010749 |
| Neur1a    | 2.24959763 |



|              |            |
|--------------|------------|
| Tmprss3      | 2.24716985 |
| Tc2n         | 2.24687513 |
| NA           | 2.2463573  |
| Slc6a15      | 2.24572833 |
| Prdm8        | 2.24498305 |
| Masp2        | 2.24276728 |
| BC016495     | 2.24161656 |
| Trdn         | 2.24040704 |
| 6530401N04R  | 2.23829648 |
| Cldn2        | 2.23230248 |
| Itgb2l       | 2.23225493 |
| NA           | 2.23158453 |
| Olf315       | 2.23002667 |
| Ear3         | 2.22848681 |
| Foxp2        | 2.22728372 |
| 4930444P10Ri | 2.22604139 |
| NA           | 2.22189475 |
| Krt19        | 2.22133327 |
| Lum          | 2.22065639 |
| Asphd1       | 2.217063   |
| AI987944     | 2.21639587 |
| 9230104K21R  | 2.21586844 |
| NA           | 2.21266998 |
| Gm5595       | 2.21180203 |
| 1700113O17R  | 2.20781331 |
| Pitx1        | 2.20638682 |
| Trip12       | 2.19973809 |
| Polh         | 2.19809694 |
| Pcdhb1       | 2.19607068 |
| Gira1        | 2.19595132 |
| Ptprz1       | 2.19502561 |
| NA           | 2.19409612 |
| Dbf4         | 2.19401431 |
| 6720420G18R  | 2.19233136 |

|              |            |
|--------------|------------|
| Nktr         | 2.18872398 |
| Ltb4r2       | 2.18815238 |
| NA           | 2.18766898 |
| V1rb2        | 2.18532781 |
| Zfp715       | 2.18523077 |
| Igfbp5       | 2.18520634 |
| Pftk1        | 2.18471749 |
| Tmem56       | 2.1824494  |
| NA           | 2.18032252 |
| NA           | 2.18022763 |
| C030007D22R  | 2.17830727 |
| Dkk2         | 2.1782543  |
| Spata17      | 2.17764143 |
| NA           | 2.17751109 |
| Meig1        | 2.17568084 |
| Clca1        | 2.17360416 |
| Ntn3         | 2.17257095 |
| 9330184L24Ri | 2.17102319 |
| A930041I02Ri | 2.16996068 |
| She          | 2.16962197 |
| Plagl1       | 2.1670916  |
| Edil3        | 2.16513327 |
| NA           | 2.16452473 |
| D8Ert56e     | 2.16310455 |
| Col11a1      | 2.1629944  |
| Coro2b       | 2.16290011 |
| NA           | 2.16274346 |
| Pgam2        | 2.16234429 |
| Sema6d       | 2.16116306 |
| NA           | 2.1603001  |
| Clmn         | 2.15989398 |
| Tmem132d     | 2.15975544 |
| Slc6a20b     | 2.15960959 |
| Nrxn3        | 2.15933098 |

|              |            |
|--------------|------------|
| NA           | 2.15915146 |
| Cntn2        | 2.15870188 |
| Igdcc4       | 2.15805881 |
| 9330118A15R  | 2.15490749 |
| Arhgap5      | 2.15363223 |
| Top2b        | 2.15186151 |
| Tbc1d30      | 2.15168615 |
| Hook1        | 2.15120958 |
| Tmem167      | 2.14897354 |
| Mmp8         | 2.14751802 |
| A730056A06R  | 2.14584529 |
| 4930518F22Ri | 2.14415661 |
| Nphs2        | 2.14251981 |
| Psmg4        | 2.1400761  |
| Slfn1        | 2.13837122 |
| D8Ertd575e   | 2.13614308 |
| NA           | 2.13053387 |
| Rptor        | 2.1272434  |
| Spaca4       | 2.12365267 |
| Dmrta1       | 2.12322647 |
| NA           | 2.12063307 |
| 2310001H17R  | 2.11842232 |
| Lyrn5        | 2.11805439 |
| Panx3        | 2.1174568  |
| Fgf14        | 2.11694693 |
| Cpn1         | 2.11116586 |
| Selp         | 2.09764409 |
| Ttc14        | 2.09650139 |
| Tbc1d14      | 2.09573804 |
| Zfp820       | 2.09421986 |
| Cab39l       | 2.09325433 |
| 4933432K03R  | 2.09264647 |
| Zfp800       | 2.09243459 |
| Kras         | 2.09092614 |

|              |            |
|--------------|------------|
| 1810010H24R  | 2.09086598 |
| NA           | 2.09042781 |
| Chrna7       | 2.08996646 |
| Rnf17        | 2.08868846 |
| AV099323     | 2.08824286 |
| Fcer2a       | 2.08581286 |
| NA           | 2.08468902 |
| Slc6a1       | 2.08416932 |
| Ckmt1        | 2.08323371 |
| C230085N15R  | 2.0826065  |
| A530047J11Ri | 2.08184977 |
| Zfp28        | 2.07875729 |
| Lrrc52       | 2.07694684 |
| Zfp28        | 2.07594698 |
| Man1a2       | 2.07452823 |
| 1700123L14Ri | 2.07426714 |
| Colq         | 2.07363164 |
| Cntn6        | 2.071773   |
| Baalc        | 2.07017104 |
| Tdrd9        | 2.0679048  |
| Kcnma1       | 2.0654497  |
| 1700003E24Ri | 2.06533829 |
| Parp6        | 2.06416846 |
| NA           | 2.06314523 |
| NA           | 2.06163363 |
| Oog3         | 2.06161287 |
| Serpina5     | 2.06051055 |
| A530058O07R  | 2.05987994 |
| NA           | 2.05983702 |
| NA           | 2.05707816 |
| 1700019P21Ri | 2.05664167 |
| Atxn10       | 2.05351647 |
| 0610033M10R  | 2.05320078 |
| Apbh         | 2.05289434 |

|              |            |
|--------------|------------|
| Pclo         | 2.05190563 |
| NA           | 2.05052262 |
| Mnt          | 2.05047697 |
| Tmsb15a      | 2.04918695 |
| NA           | 2.04530959 |
| 2610034M16R  | 2.04329343 |
| AA517858     | 2.04269441 |
| Trim44       | 2.04256723 |
| Sfrp4        | 2.03893949 |
| Adamts1      | 2.0379366  |
| NA           | 2.03719757 |
| A330106J01Ri | 2.0359175  |
| NA           | 2.03364009 |
| NA           | 2.03104073 |
| Rfx2         | 2.02991788 |
| D8Ertd620e   | 2.02929755 |
| Dlg1         | 2.02622388 |
| NA           | 2.02510594 |
| Myot         | 2.02376043 |
| Efhd1        | 2.02257335 |
| Hpgd         | 2.02177251 |
| Kcnc1        | 2.02059545 |
| 2900022B07R  | 2.01924812 |
| Slc13a5      | 2.01911147 |
| NA           | 2.01814315 |
| NA           | 2.0154862  |
| Ltf          | 2.0142564  |
| Rragd        | 2.01319871 |
| NA           | 2.01318079 |
| Armcx4       | 2.01312007 |
| Pip          | 2.01245886 |
| 6430500D05R  | 2.01244511 |
| Klra7        | 2.01141666 |
| Pnliprp2     | 2.01061629 |

|              |             |
|--------------|-------------|
| Pi15         | 2.01043316  |
| A630038E17R  | 2.01018991  |
| Pcdhb6       | 2.00930025  |
| Usp50        | 2.00910687  |
| NA           | 2.00882407  |
| NA           | 2.00842329  |
| NA           | 2.00803086  |
| 9130007G19R  | 2.00697899  |
| BC054059     | 2.00622081  |
| Slc5a9       | 2.0053714   |
| Gm10454      | 2.00478226  |
| Cct4         | 2.00257468  |
| 4933424H11R  | 2.0013033   |
| Nfxl1        | 2.00086776  |
| 2900052N01R  | 2.00055099  |
| NA           | 2.00041319  |
| 6330534C20R  | 2.0002712   |
| Aifm3        | -2.00000437 |
| NA           | -2.00331462 |
| NA           | -2.00399088 |
| Ighg         | -2.0040886  |
| F2rl2        | -2.00443173 |
| Fndc7        | -2.00444977 |
| Krt73        | -2.00448491 |
| Sim2         | -2.00497391 |
| 6430710M23R  | -2.00538518 |
| 4931402G19R  | -2.00617183 |
| NA           | -2.0062817  |
| Zfp804a      | -2.00647852 |
| 4930480K15R  | -2.00694188 |
| 4833408G04R  | -2.00774647 |
| Kcnq1ot1     | -2.00879284 |
| 2310038E17Ri | -2.00964594 |
| 4832406H04R  | -2.01038096 |

|              |             |
|--------------|-------------|
| Nrcam        | -2.01112061 |
| Olfml1       | -2.01212096 |
| Gm996        | -2.01462521 |
| Anks1b       | -2.01578653 |
| Kcnu1        | -2.01608649 |
| Map6d1       | -2.01651757 |
| Cobl         | -2.01692825 |
| NA           | -2.01715688 |
| Satb1        | -2.01869579 |
| Kcna1        | -2.01996725 |
| 4933409F18Ri | -2.0212369  |
| A830010M09R  | -2.02174254 |
| NA           | -2.02177974 |
| Zfp385b      | -2.0218483  |
| Setd4        | -2.02300697 |
| 4933431I19Ri | -2.02321974 |
| Klk1b3       | -2.02455235 |
| Pfn4         | -2.02490104 |
| 9330169B04R  | -2.02511691 |
| Sult6b1      | -2.02548392 |
| Dnahc6       | -2.02578823 |
| NA           | -2.02596417 |
| NA           | -2.02782644 |
| H2-Aa        | -2.02785485 |
| Trex1        | -2.02811042 |
| 4931409D07R  | -2.02813352 |
| Klk1b5       | -2.02836528 |
| Slc30a10     | -2.03070012 |
| Api5         | -2.03134807 |
| AA589418     | -2.03141899 |
| Krtap14      | -2.03147207 |
| Gpr158       | -2.03295832 |
| Bcas3        | -2.0332874  |
| 2810410P21Ri | -2.0337031  |

|              |             |
|--------------|-------------|
| NA           | -2.03467902 |
| 1700066B19R  | -2.03653611 |
| AU020745     | -2.03833995 |
| Prl          | -2.03963297 |
| 4933416I08Ri | -2.04024924 |
| Polr1a       | -2.04306129 |
| NA           | -2.04318946 |
| Aqp3         | -2.04329622 |
| NA           | -2.04457566 |
| 6330526H18R  | -2.04483989 |
| Nsun7        | -2.0459956  |
| Psg19        | -2.04615155 |
| Zp1          | -2.04647852 |
| 100042889    | -2.04681046 |
| NA           | -2.04761473 |
| 2310058F05Ri | -2.04866571 |
| Arhgef15     | -2.04876547 |
| Nkx2-3       | -2.05011672 |
| Nudt9        | -2.05015783 |
| 1810006J02Ri | -2.05110513 |
| NA           | -2.05114563 |
| C130090K23R  | -2.05178033 |
| C030007D22R  | -2.05262633 |
| Kcnj5        | -2.05397932 |
| NA           | -2.05646815 |
| NA           | -2.05660571 |
| 2310007L24Ri | -2.05691936 |
| Prex2        | -2.05751803 |
| Zeb1         | -2.05808424 |
| 9530003O04R  | -2.06115077 |
| AI194348     | -2.06195552 |
| Slco6c1      | -2.062589   |
| V1rd3        | -2.06415056 |
| Ganc         | -2.06445461 |



|              |             |
|--------------|-------------|
| 1110014L15Ri | -2.06647487 |
| Ccdc79       | -2.0667887  |
| Gdf3         | -2.0671206  |
| H2-Ab1       | -2.06754768 |
| NA           | -2.06756446 |
| NA           | -2.06777979 |
| Lin28b       | -2.06857836 |
| NA           | -2.06915508 |
| Prdx6-rs1    | -2.06985973 |
| NA           | -2.07131663 |
| Klkb1        | -2.07140702 |
| Igsf11       | -2.07224031 |
| 4930521A18R  | -2.07331874 |
| Cd226        | -2.07380355 |
| NA           | -2.07464474 |
| 4930405D01R  | -2.07531607 |
| NA           | -2.07565132 |
| Trhde        | -2.07598616 |
| Dnahc8       | -2.07688554 |
| Cpa2         | -2.07716296 |
| C77370       | -2.07778398 |
| NA           | -2.07847064 |
| Iffo1        | -2.08038727 |
| Myf5         | -2.08208128 |
| Kcnip1       | -2.08241409 |
| Ccdc7        | -2.08247374 |
| NA           | -2.08303484 |
| NA           | -2.08306416 |
| NA           | -2.08313803 |
| 1700054K19R  | -2.08342379 |
| NA           | -2.0835644  |
| Wnt2         | -2.08484891 |
| Zfhx2as      | -2.08581399 |
| NA           | -2.08676186 |

|              |             |
|--------------|-------------|
| Akr7a5       | -2.08828594 |
| Aldoc        | -2.08836623 |
| NA           | -2.08844828 |
| Abcd2        | -2.08874607 |
| 5730510P18Ri | -2.08902861 |
| Grip1        | -2.09005838 |
| Veph1        | -2.09071706 |
| B230325K18R  | -2.09072979 |
| NA           | -2.09132408 |
| Cacna2d2     | -2.09216987 |
| AI593442     | -2.09361405 |
| 9330109K16R  | -2.09546793 |
| NA           | -2.09624028 |
| 4930544N03R  | -2.09668306 |
| NA           | -2.09758221 |
| Zfp606       | -2.09785578 |
| BC053393     | -2.09805936 |
| Iqcf3        | -2.09806103 |
| Ttn          | -2.09902574 |
| NA           | -2.10053784 |
| NA           | -2.10122617 |
| 5033417F24Ri | -2.10156088 |
| 4930439G18R  | -2.10319773 |
| Krt17        | -2.10379996 |
| 2810408A11R  | -2.10386098 |
| Pdzk1        | -2.10464101 |
| Il1f8        | -2.10546481 |
| Lsamp        | -2.10555085 |
| Pglyrp2      | -2.10612289 |
| Cdh8         | -2.10652676 |
| Kcnj3        | -2.10665315 |
| Zfp248       | -2.10700202 |
| 9430014N10R  | -2.1070769  |
| NA           | -2.1074585  |

|              |             |
|--------------|-------------|
| Iqcf1        | -2.10761405 |
| Ambp         | -2.10841859 |
| Rit2         | -2.1095841  |
| Plekha6      | -2.11056991 |
| Gad1         | -2.11084855 |
| NA           | -2.11217862 |
| Gm10523      | -2.11244871 |
| C530028O21R  | -2.11285311 |
| Ryr3         | -2.1133972  |
| Igh-6        | -2.11354351 |
| 4933428L01Ri | -2.11395203 |
| Cpz          | -2.11451779 |
| Churc1       | -2.11662471 |
| Rassf4       | -2.11767821 |
| 1700016K19R  | -2.11816795 |
| Hdac10       | -2.11878958 |
| NA           | -2.12089405 |
| Angptl4      | -2.12093627 |
| Cabyr        | -2.12098024 |
| Gnal         | -2.1215137  |
| Tpbpb        | -2.12167418 |
| NA           | -2.12178086 |
| Cd164l2      | -2.12215613 |
| NA           | -2.12277664 |
| 1810021M19R  | -2.12287758 |
| NA           | -2.12293941 |
| 4933439N06R  | -2.12365559 |
| 4930484H19R  | -2.12377189 |
| Iqcf4        | -2.12412545 |
| Lysmd2       | -2.12509361 |
| NA           | -2.12525026 |
| Actl7a       | -2.12570411 |
| Hoxd10       | -2.12838605 |
| NA           | -2.12896118 |

|              |             |
|--------------|-------------|
| 4930471M23R  | -2.12913668 |
| 6330412A17R  | -2.13022335 |
| 7630403G23R  | -2.13124775 |
| Slc22a9      | -2.13193851 |
| NA           | -2.13260366 |
| 5033423K11R  | -2.13266751 |
| Spry3        | -2.13386045 |
| Drd3         | -2.13412746 |
| Rims2        | -2.13460884 |
| Laptm5       | -2.13572983 |
| NA           | -2.13634137 |
| Gm9475       | -2.13645591 |
| NA           | -2.1380241  |
| ENSMUSG0000  | -2.13815254 |
| Dtna         | -2.13866087 |
| Spag16       | -2.13974013 |
| Abcc10       | -2.13992075 |
| NA           | -2.14031755 |
| 4930448E06Ri | -2.14324522 |
| NA           | -2.14386947 |
| NA           | -2.14412908 |
| 4930573O21R  | -2.14415454 |
| NA           | -2.14445288 |
| Fn3k         | -2.14463262 |
| NA           | -2.1446771  |
| Ccr4         | -2.14533062 |
| 4933432K03R  | -2.14550782 |
| NA           | -2.14647992 |
| 2010012P19Ri | -2.14686324 |
| 4930523C07R  | -2.14688033 |
| Map2k6       | -2.14733628 |
| B930096F20Ri | -2.1495611  |
| Igfals       | -2.1511224  |
| Slc8a1       | -2.15184523 |

|              |             |
|--------------|-------------|
| 4932435O22R  | -2.1543339  |
| NA           | -2.15479888 |
| 1700015F17Ri | -2.15585347 |
| NA           | -2.15661435 |
| Otop1        | -2.15778711 |
| NA           | -2.15827456 |
| A930001A20R  | -2.15860173 |
| NA           | -2.15942744 |
| 9130401L11Ri | -2.16016391 |
| Wnt8b        | -2.16164708 |
| C86371       | -2.16365949 |
| Pik3ap1      | -2.1644371  |
| 2010003K11R  | -2.16576908 |
| AU022077     | -2.16601645 |
| Muc4         | -2.16663395 |
| 9230110F11Ri | -2.16671324 |
| Lipf         | -2.16738474 |
| NA           | -2.16799098 |
| Defb5        | -2.16887184 |
| NA           | -2.1692674  |
| 2610037D02R  | -2.17017002 |
| 4930473O22R  | -2.1708714  |
| Cadm2        | -2.17284257 |
| Pdc          | -2.17294046 |
| NA           | -2.1729631  |
| NA           | -2.17342732 |
| Gm10461      | -2.17817258 |
| 1700016A09R  | -2.17867757 |
| Pfpl         | -2.17955798 |
| Sox11        | -2.18020674 |
| NA           | -2.18077017 |
| 4933406C10R  | -2.18078061 |
| E230029C05R  | -2.18128619 |
| Pck1         | -2.18144017 |

|              |             |
|--------------|-------------|
| Slc39a5      | -2.18213308 |
| Drd2         | -2.18510397 |
| NA           | -2.18666263 |
| NA           | -2.18719015 |
| Tmem162      | -2.18754183 |
| Six6os1      | -2.18762435 |
| NA           | -2.1885942  |
| Krt71        | -2.18880254 |
| C86753       | -2.18928766 |
| NA           | -2.18943229 |
| NA           | -2.18980204 |
| Snap91       | -2.19224556 |
| Lhx1         | -2.19333452 |
| Smcp         | -2.19618426 |
| Slc27a5      | -2.1962672  |
| Gm10937      | -2.19646686 |
| Krtap16-8    | -2.19704139 |
| Sh3bp5       | -2.19714131 |
| Fam5b        | -2.19738402 |
| H2-Aa        | -2.19800692 |
| 4933413G19R  | -2.19885295 |
| 4930533L02Ri | -2.19889909 |
| Nrsn2        | -2.19930257 |
| NA           | -2.19978016 |
| NA           | -2.19988546 |
| Sds          | -2.19997139 |
| Stmn2        | -2.2005564  |
| D930001B02   | -2.20099384 |
| Cd163l1      | -2.20222136 |
| Pax6         | -2.20228333 |
| Usmg2        | -2.20334651 |
| NA           | -2.20405341 |
| Rnf186       | -2.20498911 |
| Icam5        | -2.20621309 |

|              |             |
|--------------|-------------|
| Ttr          | -2.20654782 |
| 4930466F19Ri | -2.20676597 |
| Abpa         | -2.20738727 |
| NA           | -2.20759521 |
| Fam83f       | -2.20823814 |
| Neurod6      | -2.20862558 |
| Slc4a4       | -2.20870719 |
| Slc5a3       | -2.2095793  |
| NA           | -2.21275174 |
| 6230426I18Ri | -2.21337655 |
| Tox3         | -2.21646479 |
| Lrrc18       | -2.22372338 |
| Tc2n         | -2.22401019 |
| 5430427N15R  | -2.22424268 |
| Vgll1        | -2.22605962 |
| NA           | -2.22664426 |
| NA           | -2.22677206 |
| NA           | -2.22754619 |
| NA           | -2.22820195 |
| Cndp1        | -2.2296974  |
| Hs3st3b1     | -2.22976278 |
| NA           | -2.23083032 |
| 2700012I20Ri | -2.2315833  |
| 5430435G22R  | -2.23167809 |
| 9430031J08Ri | -2.23229785 |
| 2210409O19R  | -2.2328414  |
| NA           | -2.23399672 |
| Lce1m        | -2.2346008  |
| Car8         | -2.23531744 |
| NA           | -2.23542128 |
| NA           | -2.23628567 |
| NA           | -2.23662236 |
| NA           | -2.23708831 |
| Ppt1         | -2.23757074 |

|              |             |
|--------------|-------------|
| NA           | -2.23827169 |
| Erbp4        | -2.23908239 |
| NA           | -2.24116079 |
| Gabra2       | -2.24262001 |
| NA           | -2.24295102 |
| Tjp3         | -2.24434677 |
| C130070B15R  | -2.24537515 |
| NA           | -2.24573187 |
| Cer1         | -2.24580434 |
| Dis3l2       | -2.24630638 |
| BC051628     | -2.24652482 |
| Speer4b      | -2.24768754 |
| NA           | -2.24888209 |
| Gira4        | -2.25001354 |
| 6720468P15Ri | -2.25028856 |
| Kctd8        | -2.2507171  |
| Tmem215      | -2.25164566 |
| NA           | -2.25294538 |
| Rasef        | -2.2535244  |
| Rffl         | -2.25417848 |
| NA           | -2.25794563 |
| NA           | -2.26158805 |
| NA           | -2.26327553 |
| NA           | -2.26502396 |
| Ucn          | -2.26529131 |
| NA           | -2.26836817 |
| Rit2         | -2.26916251 |
| NA           | -2.2711005  |
| Scamp5       | -2.27216635 |
| NA           | -2.27243777 |
| Susd2        | -2.2729972  |
| Lyrn7        | -2.27585745 |
| NA           | -2.27967682 |
| Epha3        | -2.28105397 |



|              |             |
|--------------|-------------|
| NA           | -2.28203784 |
| Gjb5         | -2.28228528 |
| Ugt2a3       | -2.28353604 |
| NA           | -2.28402733 |
| Sfxn5        | -2.28450608 |
| Zfp458       | -2.28561336 |
| NA           | -2.28704632 |
| NA           | -2.29258142 |
| NA           | -2.29274638 |
| NA           | -2.29295874 |
| Lrrc27       | -2.29302274 |
| Krtap5-5     | -2.29359246 |
| St8sia3      | -2.29485582 |
| Ptchd2       | -2.29739513 |
| Cnpy1        | -2.29813192 |
| NA           | -2.29864688 |
| 1700018P08Ri | -2.30134579 |
| Irs4         | -2.30177062 |
| Ankrd31      | -2.30328783 |
| Ikzf4        | -2.30355057 |
| Ddx47        | -2.30443896 |
| Stox1        | -2.30661321 |
| 2610011I18Ri | -2.30829567 |
| Shh          | -2.30934572 |
| 1700113H08R  | -2.3102253  |
| NA           | -2.3103209  |
| NA           | -2.31306012 |
| 4930412C18R  | -2.31395531 |
| NA           | -2.31483866 |
| 4933400F21Ri | -2.31514308 |
| C430049A07R  | -2.31540262 |
| NA           | -2.31606597 |
| Gm9918       | -2.31645809 |
| NA           | -2.31649042 |

|              |             |
|--------------|-------------|
| 6430571L13Ri | -2.31701505 |
| Sostdc1      | -2.31738853 |
| Fmo2         | -2.31782069 |
| NA           | -2.31884522 |
| E2f5         | -2.31909833 |
| AA408296     | -2.3193408  |
| NA           | -2.32014745 |
| Cd2          | -2.32034288 |
| Ndst4        | -2.32066013 |
| Wdr86        | -2.32161813 |
| NA           | -2.32385404 |
| 2310021H06R  | -2.32715896 |
| Jakmip3      | -2.32896083 |
| Pdzrn4       | -2.3300173  |
| NA           | -2.3301826  |
| 8030442B05R  | -2.33070191 |
| 6430711C07R  | -2.33208549 |
| D7Ert558e    | -2.33331374 |
| NA           | -2.33450912 |
| Tram2        | -2.3346634  |
| Itga4        | -2.33990196 |
| Grid1        | -2.34115553 |
| 4933433N18R  | -2.34303315 |
| Prlr         | -2.34329671 |
| Cml2         | -2.34344536 |
| NA           | -2.3434773  |
| NA           | -2.34447433 |
| NA           | -2.34464911 |
| NA           | -2.3449362  |
| Mycbpap      | -2.34621915 |
| Rph3a        | -2.34647107 |
| 3830403N18R  | -2.34660966 |
| Eya3         | -2.34695444 |
| Zhx1         | -2.34701361 |

|             |             |
|-------------|-------------|
| Slc6a14     | -2.35105974 |
| NA          | -2.35136517 |
| NA          | -2.35199852 |
| NA          | -2.35229502 |
| Nanog       | -2.35421527 |
| Fgf2        | -2.35633022 |
| Morc2b      | -2.35727367 |
| NA          | -2.35863432 |
| NA          | -2.36098638 |
| Dact3       | -2.36129012 |
| NA          | -2.36707388 |
| 5830426K05R | -2.36773456 |
| NA          | -2.36819419 |
| Scn10a      | -2.3696748  |
| Krtap3-2    | -2.36983485 |
| Pou4f3      | -2.37022049 |
| NA          | -2.37316106 |
| Cphx        | -2.3736718  |
| NA          | -2.37422424 |
| Olfm3       | -2.37676941 |
| 4930519H02R | -2.37733317 |
| Ccdc146     | -2.3777612  |
| Cylc2       | -2.37779971 |
| 5730408A14R | -2.37899089 |
| Prox1       | -2.37992758 |
| Rtp3        | -2.38013327 |
| Eda         | -2.38054513 |
| Nrk         | -2.38110894 |
| Ceacam1     | -2.38218478 |
| 6330415G19R | -2.38278929 |
| NA          | -2.38279728 |
| Zfp353      | -2.38337217 |
| Trpm3       | -2.38459452 |
| Igf2bp3     | -2.38573798 |

|              |             |
|--------------|-------------|
| NA           | -2.38636748 |
| Pde4b        | -2.38662378 |
| D10Erttd755e | -2.38710907 |
| Gpr177       | -2.38737813 |
| Sycn         | -2.38869621 |
| NA           | -2.38920325 |
| Gpr161       | -2.39063179 |
| Hesx1        | -2.39219451 |
| Gje1         | -2.39326533 |
| NA           | -2.39642294 |
| NA           | -2.39797907 |
| NA           | -2.39936625 |
| NA           | -2.40023531 |
| Tdtd5        | -2.40098002 |
| NA           | -2.4015136  |
| Oaz3         | -2.40157992 |
| Tomm20l      | -2.40285617 |
| 5730470L24Ri | -2.40521108 |
| Otc          | -2.40522877 |
| Chia         | -2.40824622 |
| Adam10       | -2.40847103 |
| Ddrgk1       | -2.40939746 |
| NA           | -2.40960623 |
| Pisd-ps3     | -2.41434818 |
| Allc         | -2.41677867 |
| NA           | -2.41830625 |
| Gm8154       | -2.41846933 |
| Vmn2r84      | -2.41970867 |
| Rsph4a       | -2.42010027 |
| C230021G24R  | -2.42153584 |
| NA           | -2.42278809 |
| 4930555B11R  | -2.42540291 |
| Gria1        | -2.42640167 |
| NA           | -2.42675844 |

|             |             |
|-------------|-------------|
| NA          | -2.42751795 |
| NA          | -2.42832201 |
| C87114      | -2.43285476 |
| NA          | -2.43437702 |
| Trpv4       | -2.44150417 |
| Sucnr1      | -2.4436598  |
| 5830435N06R | -2.44753932 |
| 1110019B22R | -2.44923323 |
| Krtap5-1    | -2.45082945 |
| NA          | -2.45196697 |
| Dmrt3       | -2.45264109 |
| Btn1a1      | -2.45356556 |
| Klk1b4      | -2.45502311 |
| Zfp612      | -2.45535601 |
| Ptpr        | -2.45575333 |
| Gm6484      | -2.45621256 |
| Htr3b       | -2.45708436 |
| Plac8l1     | -2.45932168 |
| Cabyr       | -2.45982321 |
| NA          | -2.46326541 |
| A930011E06R | -2.46464196 |
| BC026585    | -2.4657339  |
| Tnks        | -2.46766266 |
| NA          | -2.46907437 |
| 1700085C21R | -2.47122356 |
| AY512915    | -2.47217176 |
| C78142      | -2.47232139 |
| Pctk1       | -2.47445741 |
| NA          | -2.4751387  |
| Rnf122      | -2.47565681 |
| NA          | -2.47594841 |
| Boll        | -2.48065403 |
| Cux2        | -2.48111276 |
| NA          | -2.48228763 |

|              |             |
|--------------|-------------|
| Nell2        | -2.48377779 |
| NA           | -2.48948819 |
| NA           | -2.4916223  |
| NA           | -2.4925217  |
| Tgm2         | -2.49613228 |
| Krtap4-6     | -2.49945967 |
| 4833417J16Ri | -2.5009378  |
| Lalba        | -2.50150031 |
| NA           | -2.50379973 |
| 3110049I03Ri | -2.50445151 |
| Dock3        | -2.50530883 |
| NA           | -2.50594124 |
| Rnf17        | -2.50692864 |
| Abl2         | -2.50727463 |
| Hpca         | -2.50774168 |
| Cnnm1        | -2.50846761 |
| NA           | -2.50848877 |
| Klk1         | -2.5089085  |
| Foxl2        | -2.50894804 |
| 4930519N06R  | -2.5124646  |
| 5830461L22Ri | -2.51494279 |
| NA           | -2.51505172 |
| C80993       | -2.52089453 |
| Psd3         | -2.52124391 |
| NA           | -2.5215495  |
| Chrna5       | -2.5218172  |
| D730050C22R  | -2.52242199 |
| Ubttd1       | -2.52362067 |
| NA           | -2.52453161 |
| NA           | -2.52614648 |
| 4833424O15R  | -2.52665129 |
| Lgals7       | -2.52912179 |
| NA           | -2.53417327 |
| Cts3         | -2.53971824 |

|              |             |
|--------------|-------------|
| NA           | -2.5401695  |
| Slc4a3       | -2.54259305 |
| Sox7         | -2.54420032 |
| Ribc2        | -2.54621148 |
| 4933414I15Ri | -2.54634271 |
| Prol1        | -2.54779488 |
| Fgf12        | -2.54943701 |
| 1700016D06R  | -2.54966229 |
| Ptk6         | -2.55125325 |
| NA           | -2.55177594 |
| Rnf160       | -2.5541951  |
| Rab8a        | -2.55645585 |
| Dnttip1      | -2.55707509 |
| 5031415H12R  | -2.55852547 |
| NA           | -2.56007338 |
| Pdcl2        | -2.56099819 |
| Alg5         | -2.56153418 |
| Ntng1        | -2.56296525 |
| NA           | -2.56518725 |
| 4933436I20Ri | -2.56673057 |
| Gm941        | -2.56682952 |
| Rinl         | -2.56727217 |
| Coq10a       | -2.56818404 |
| Acsbg2       | -2.57143119 |
| V1ra5        | -2.57224718 |
| NA           | -2.57288717 |
| NA           | -2.57297805 |
| Nsf          | -2.5737359  |
| Fpr-rs3      | -2.57673585 |
| NA           | -2.57738914 |
| NA           | -2.5786476  |
| NA           | -2.57898615 |
| D12Erttd208e | -2.58157167 |
| Cyp7b1       | -2.58339502 |

|              |             |
|--------------|-------------|
| NA           | -2.58470979 |
| Ankrd10      | -2.58659698 |
| 6430710C18R  | -2.58798208 |
| NA           | -2.58865027 |
| NA           | -2.59090136 |
| A330050F15Ri | -2.59248093 |
| NA           | -2.59376889 |
| Trhr         | -2.59393329 |
| Dvwa         | -2.59453544 |
| NA           | -2.59559107 |
| Lmtk3        | -2.59677897 |
| NA           | -2.59759296 |
| Nedd4l       | -2.59857876 |
| Plcb4        | -2.59868416 |
| 5330430B06R  | -2.60137334 |
| Kcnmb1       | -2.60279097 |
| Zap70        | -2.60502192 |
| NA           | -2.60889623 |
| Cyp4x1       | -2.6106205  |
| Lhx2         | -2.61092192 |
| Bpil2        | -2.6142407  |
| Lefty2       | -2.61494999 |
| Rxra         | -2.61744978 |
| Foxp2        | -2.62289611 |
| 1700001C19R  | -2.62331391 |
| Dnajc17      | -2.62449136 |
| Myh11        | -2.6248114  |
| Syt1         | -2.62573297 |
| 1500004A13R  | -2.62677721 |
| NA           | -2.62702773 |
| Syce1        | -2.62838976 |
| LOC10004707  | -2.62949326 |
| Runx3        | -2.63261214 |
| Nrg3         | -2.6340473  |



|              |             |
|--------------|-------------|
| A430108G06R  | -2.63406091 |
| A930038C07R  | -2.63498857 |
| NA           | -2.6358806  |
| Mak          | -2.63965677 |
| Odz2         | -2.64825492 |
| Gm4988       | -2.65269022 |
| Hsf4         | -2.65583707 |
| Clmn         | -2.65913873 |
| Sult1a1      | -2.66485653 |
| C4bp         | -2.67039093 |
| 9330159N22R  | -2.67046223 |
| 1700026J04Ri | -2.67466432 |
| Gm7844       | -2.67602664 |
| C77545       | -2.67672655 |
| NA           | -2.6783486  |
| Acsm2        | -2.67973829 |
| Calb1        | -2.68007681 |
| NA           | -2.68374272 |
| NA           | -2.68475946 |
| D4Erttd571e  | -2.68822267 |
| NA           | -2.68911753 |
| 4930524O07R  | -2.69274404 |
| Gprin3       | -2.69676203 |
| Cd200r3      | -2.70140633 |
| 4933415J04Ri | -2.70764345 |
| Gm11563      | -2.70883855 |
| Krtap6-1     | -2.70940933 |
| 1810028F09Ri | -2.71142388 |
| Six6         | -2.71175465 |
| NA           | -2.71750185 |
| Erp27        | -2.72207863 |
| Etl4         | -2.72282948 |
| Krtap5-1     | -2.72301057 |
| F11          | -2.72684705 |

|              |             |
|--------------|-------------|
| Ccdc34       | -2.72763815 |
| NA           | -2.73167679 |
| Grid1        | -2.73832421 |
| NA           | -2.73922172 |
| Farp1        | -2.73936928 |
| Gk2          | -2.73946379 |
| Lman1        | -2.75270288 |
| 4932430A15R  | -2.75274509 |
| NA           | -2.75341095 |
| Krt25        | -2.75777842 |
| NA           | -2.75872968 |
| Krt86        | -2.76029854 |
| 4933436H12R  | -2.76031731 |
| Pcdhb18      | -2.76401133 |
| 5031426D15R  | -2.76860281 |
| Ccdc105      | -2.77092486 |
| Kif24        | -2.77237036 |
| Cml3         | -2.77253742 |
| Fam84a       | -2.7755407  |
| NA           | -2.77578204 |
| Ebf1         | -2.78242215 |
| 3110080E11Ri | -2.79493259 |
| NA           | -2.79554879 |
| Fry          | -2.79566539 |
| NA           | -2.8000843  |
| A330102K18R  | -2.80032146 |
| Dmc1         | -2.80071566 |
| Adamts19     | -2.80470347 |
| Dnase2b      | -2.8065486  |
| Trim71       | -2.80813565 |
| NA           | -2.81138922 |
| Dntt         | -2.81368898 |
| NA           | -2.81567915 |
| NA           | -2.81739357 |

|             |             |
|-------------|-------------|
| Dpys        | -2.81919955 |
| NA          | -2.82521081 |
| Slco1b2     | -2.83104908 |
| Polr3k      | -2.83201783 |
| NA          | -2.83903744 |
| NA          | -2.84065816 |
| Ccl27a      | -2.84107474 |
| NA          | -2.84266929 |
| Cyp2b10     | -2.84398868 |
| 2810403D21R | -2.8471814  |
| Slc6a14     | -2.84797246 |
| Serpinb7    | -2.85997117 |
| 9530006O14R | -2.86279887 |
| NA          | -2.86925688 |
| NA          | -2.87168063 |
| Tmem143     | -2.88101199 |
| NA          | -2.88318624 |
| NA          | -2.88712301 |
| NA          | -2.89056215 |
| Siglece     | -2.89189615 |
| C1qtnf4     | -2.89313488 |
| NA          | -2.89755083 |
| NA          | -2.89911278 |
| Epha5       | -2.8991577  |
| BC006965    | -2.89936645 |
| Sstr4       | -2.9087996  |
| D530049N12R | -2.90960918 |
| Tal2        | -2.91188817 |
| Atp1a2      | -2.92000685 |
| 4833419A21R | -2.92146626 |
| NA          | -2.9215054  |
| Sult3a1     | -2.92251797 |
| NA          | -2.92417968 |
| BC037703    | -2.92685236 |

|             |             |
|-------------|-------------|
| P2rx4       | -2.93063243 |
| NA          | -2.93148338 |
| 4933431M02R | -2.94920202 |
| Tatdn3      | -2.95301865 |
| NA          | -2.95358988 |
| Tmprss11d   | -2.95463679 |
| NA          | -2.95871558 |
| Ahrr        | -2.96124218 |
| NA          | -2.96359213 |
| Krtap15     | -2.96848621 |
| Prkce       | -2.97147168 |
| NA          | -2.97361045 |
| Wdr20b      | -2.97644308 |
| AU022054    | -2.98793479 |
| Klra15      | -2.99456873 |
| 4930444M15R | -2.99494576 |
| Rragd       | -2.99649558 |
| NA          | -2.99852957 |
| NA          | -2.99995111 |
| Cyp3a16     | -3.00204493 |
| NA          | -3.00440133 |
| Impg1       | -3.00608342 |
| Dgkg        | -3.01288337 |
| Stmn3       | -3.01413454 |
| B230334C09R | -3.02618038 |
| Six6os1     | -3.02866065 |
| NA          | -3.03798082 |
| Ubn2        | -3.04734342 |
| NA          | -3.05797564 |
| NA          | -3.06335996 |
| Ndn         | -3.0656792  |
| Gm941       | -3.07427425 |
| Orly        | -3.07721124 |
| NA          | -3.09610357 |

|              |             |
|--------------|-------------|
| Rp1          | -3.09885377 |
| Opr1         | -3.10114834 |
| C80171       | -3.10263913 |
| Heatr7a      | -3.11017565 |
| E330009P21Ri | -3.11831686 |
| Brwd3        | -3.13587395 |
| A230048O21R  | -3.1525744  |
| NA           | -3.17480913 |
| Grpr         | -3.17553477 |
| Hsd17b13     | -3.17665799 |
| Tbx5         | -3.17777067 |
| Osbpl7       | -3.17887537 |
| NA           | -3.18871636 |
| Pde1c        | -3.18966048 |
| NA           | -3.20170622 |
| Tcrb-J       | -3.2125569  |
| Fbxw14       | -3.2231137  |
| Eya4         | -3.22374623 |
| NA           | -3.22976119 |
| NA           | -3.2347947  |
| Krtap8-1     | -3.24490202 |
| 1110059G02R  | -3.24945376 |
| 4933413C19R  | -3.25451426 |
| 1700065D16R  | -3.27650003 |
| Catsper3     | -3.28311255 |
| NA           | -3.29508504 |
| 4930518J20Ri | -3.29794273 |
| Igf2bp3      | -3.30226746 |
| C80918       | -3.30509213 |
| Peli2        | -3.30515282 |
| Tnfaip2      | -3.30771745 |
| Txn1         | -3.31040575 |
| NA           | -3.34085502 |
| NA           | -3.34544354 |

|              |             |
|--------------|-------------|
| Dsc3         | -3.34682989 |
| 1700086L19Ri | -3.3742987  |
| NA           | -3.38392987 |
| Gpr12        | -3.38516831 |
| 4930432K09R  | -3.38989504 |
| NA           | -3.39612218 |
| NA           | -3.39809779 |
| Ablim3       | -3.40307517 |
| NA           | -3.43098301 |
| NA           | -3.45683016 |
| Tmco5        | -3.46230609 |
| NA           | -3.46430201 |
| 1700095A21R  | -3.47989096 |
| NA           | -3.49534761 |
| NA           | -3.50651812 |
| Dll3         | -3.53874224 |
| NA           | -3.59036119 |
| Maf          | -3.60090317 |
| NA           | -3.60898999 |
| Rshl1        | -3.63004202 |
| NA           | -3.63881871 |
| NA           | -3.64340975 |
| V1ra2        | -3.65209882 |
| Camta1       | -3.74405911 |
| D1Pas1       | -3.79006088 |
| C78878       | -3.79278611 |
| NA           | -3.8002317  |
| Gm12330      | -3.80381309 |
| Krtap16-1    | -3.82369985 |
| NA           | -3.91100511 |
| NA           | -3.93496855 |
| Adora3       | -3.96514501 |
| NA           | -3.98255782 |
| NA           | -4.04218105 |

|       |             |
|-------|-------------|
| Cnpy1 | -4.07143971 |
| NA    | -4.07507105 |

**RankProd algorithm - Genes identified by RankProd to be down regulated  
in TA-area compared to TB-interface with  $p < 0.05$**

| gene.index | RP/Rsum  | FC:(class1/c pfp | P.value |          |
|------------|----------|------------------|---------|----------|
| 16948      | 193.7133 | 16.8122          | 0.97    | 0        |
| 17120      | 212.4308 | 13.9657          | 0.655   | 1.00E-04 |
| 13575      | 225.1103 | 15.6181          | 0.4967  | 1.00E-04 |
| 10275      | 245.3593 | 13.8593          | 0.475   | 1.00E-04 |
| 15798      | 323.709  | 13.3991          | 0.796   | 2.00E-04 |
| 7402       | 337.4321 | 14.1595          | 0.7617  | 2.00E-04 |
| 8652       | 347.4457 | 12.5716          | 0.7057  | 2.00E-04 |
| 5497       | 360.665  | 13.8332          | 0.69    | 3.00E-04 |
| 10330      | 377.9168 | 12.1333          | 0.7033  | 3.00E-04 |
| 3450       | 381.6138 | 11.0219          | 0.653   | 3.00E-04 |
| 8636       | 405.0839 | 10.1741          | 0.7091  | 4.00E-04 |
| 3050       | 423.1008 | 7.8271           | 0.74    | 4.00E-04 |
| 15815      | 429.0964 | 10.5786          | 0.7     | 4.00E-04 |
| 5741       | 441.5175 | 9.9205           | 0.7029  | 5.00E-04 |
| 10918      | 445.6528 | 11.6216          | 0.6727  | 5.00E-04 |
| 13997      | 447.7275 | 9.8351           | 0.64    | 5.00E-04 |
| 14530      | 462.7845 | 10.4824          | 0.6582  | 5.00E-04 |
| 11054      | 472.5443 | 10.4481          | 0.6656  | 6.00E-04 |
| 11329      | 476.4601 | 12.3809          | 0.6447  | 6.00E-04 |
| 18718      | 484.3879 | 9.884            | 0.6485  | 6.00E-04 |
| 8355       | 489.501  | 9.4801           | 0.6419  | 7.00E-04 |
| 13162      | 492.964  | 7.7437           | 0.6241  | 7.00E-04 |
| 5236       | 504.6673 | 9.8646           | 0.6383  | 7.00E-04 |
| 14758      | 520.0669 | 9.5435           | 0.6583  | 8.00E-04 |
| 15586      | 525.628  | 11.1571          | 0.6504  | 8.00E-04 |
| 11222      | 531.0311 | 7.8434           | 0.6419  | 8.00E-04 |
| 472        | 544.9844 | 9.902            | 0.6659  | 9.00E-04 |
| 6973       | 551.4139 | 8.5674           | 0.6596  | 9.00E-04 |
| 3827       | 559.0866 | 7.7879           | 0.6628  | 9.00E-04 |
| 15408      | 561.1012 | 8.4398           | 0.6467  | 9.00E-04 |



|       |          |         |        |        |
|-------|----------|---------|--------|--------|
| 7365  | 565.5999 | 9.0421  | 0.6432 | 0.001  |
| 19568 | 579.098  | 10.3697 | 0.6644 | 0.001  |
| 1985  | 582.6036 | 6.7635  | 0.6558 | 0.0011 |
| 14920 | 592.9941 | 9.7345  | 0.6679 | 0.0011 |
| 19196 | 596.0217 | 9.69    | 0.658  | 0.0011 |
| 17759 | 603.0443 | 8.8924  | 0.6597 | 0.0012 |
| 4318  | 623.2881 | 9.0351  | 0.7116 | 0.0013 |
| 17109 | 639.5901 | 5.2311  | 0.7416 | 0.0014 |
| 7606  | 640.3447 | 9.124   | 0.7254 | 0.0014 |
| 13215 | 649.8466 | 9.056   | 0.7368 | 0.0014 |
| 17392 | 661.1858 | 8.1465  | 0.7539 | 0.0015 |
| 2660  | 668.1926 | 9.8844  | 0.7595 | 0.0016 |
| 10261 | 669.4596 | 8.7901  | 0.7465 | 0.0016 |
| 8650  | 670.1427 | 9.2699  | 0.7316 | 0.0016 |
| 3254  | 678.7379 | 8.0718  | 0.7371 | 0.0016 |
| 19602 | 684.598  | 7.6045  | 0.7376 | 0.0017 |
| 16546 | 689.8323 | 8.4227  | 0.7396 | 0.0017 |
| 8597  | 693.6453 | 9.338   | 0.7363 | 0.0017 |
| 1682  | 697.8392 | 2.2586  | 0.7322 | 0.0018 |
| 14857 | 712.4135 | 6.7755  | 0.7612 | 0.0019 |
| 4971  | 723.4511 | 7.5099  | 0.7769 | 0.0019 |
| 14831 | 726.838  | 7.972   | 0.7715 | 0.002  |
| 14282 | 727.6033 | 7.7232  | 0.7587 | 0.002  |
| 17761 | 730.8685 | 8.6837  | 0.7539 | 0.002  |
| 5045  | 732.5229 | 5.9474  | 0.7447 | 0.002  |
| 4499  | 733.0792 | 7.5817  | 0.7334 | 0.002  |
| 12069 | 739.3798 | 6.5405  | 0.7391 | 0.0021 |
| 14266 | 740.6985 | 6.4835  | 0.7307 | 0.0021 |
| 13822 | 742.906  | 8.2669  | 0.7258 | 0.0021 |
| 3358  | 743.3732 | 8.5899  | 0.7153 | 0.0021 |
| 7422  | 743.535  | 9.0491  | 0.7038 | 0.0021 |
| 15298 | 745.5435 | 7.5762  | 0.6956 | 0.0021 |
| 1449  | 751.8186 | 6.4089  | 0.7033 | 0.0022 |
| 17208 | 758.9477 | 3.7213  | 0.7108 | 0.0022 |

|       |          |        |        |        |
|-------|----------|--------|--------|--------|
| 8467  | 760.4332 | 6.7754 | 0.7037 | 0.0022 |
| 4814  | 762.6046 | 8.581  | 0.6976 | 0.0023 |
| 9566  | 762.8559 | 8.6349 | 0.6878 | 0.0023 |
| 11979 | 771.2564 | 7.7524 | 0.6966 | 0.0023 |
| 7331  | 775.8405 | 7.6244 | 0.6968 | 0.0023 |
| 15211 | 783.0393 | 7.1959 | 0.7069 | 0.0024 |
| 7462  | 798.3704 | 8.0338 | 0.7359 | 0.0026 |
| 18377 | 799.4436 | 7.9334 | 0.7278 | 0.0026 |
| 14510 | 803.3384 | 8.1605 | 0.7263 | 0.0026 |
| 4311  | 804.1347 | 7.4225 | 0.7185 | 0.0026 |
| 4563  | 806.1501 | 8.0113 | 0.7136 | 0.0026 |
| 496   | 821.4414 | 6.8801 | 0.7438 | 0.0028 |
| 8453  | 824.3105 | 6.3416 | 0.7414 | 0.0028 |
| 213   | 830.1315 | 8.3726 | 0.7426 | 0.0028 |
| 20133 | 839.2988 | 6.3909 | 0.7556 | 0.0029 |
| 1478  | 840.3666 | 5.4321 | 0.7489 | 0.0029 |
| 17959 | 846.1811 | 6.9871 | 0.7521 | 0.003  |
| 9807  | 848.7338 | 8.0788 | 0.7485 | 0.003  |
| 8709  | 848.8609 | 7.1159 | 0.7396 | 0.003  |
| 7420  | 861.4775 | 7.0577 | 0.761  | 0.0031 |
| 7543  | 864.4633 | 5.1937 | 0.76   | 0.0032 |
| 7300  | 866.8025 | 6.8473 | 0.7565 | 0.0032 |
| 15510 | 892.1501 | 7.2743 | 0.8036 | 0.0034 |
| 14234 | 896.4601 | 6.94   | 0.8036 | 0.0035 |
| 14456 | 904.7962 | 6.8145 | 0.8137 | 0.0035 |
| 15545 | 907.4892 | 6.966  | 0.8102 | 0.0036 |
| 3622  | 911.4208 | 7.4599 | 0.8091 | 0.0036 |
| 2800  | 928.1276 | 7.1655 | 0.8383 | 0.0038 |
| 13792 | 935.0557 | 7.8704 | 0.8482 | 0.0039 |
| 3327  | 938.0644 | 6.7398 | 0.8467 | 0.0039 |
| 10973 | 939.8418 | 6.6237 | 0.8412 | 0.0039 |
| 7478  | 942.0314 | 4.6719 | 0.8364 | 0.0039 |
| 18549 | 942.5543 | 7.0038 | 0.829  | 0.0039 |
| 4270  | 943.1975 | 4.13   | 0.8221 | 0.0039 |

|       |           |        |        |        |
|-------|-----------|--------|--------|--------|
| 19806 | 947.7548  | 6.9435 | 0.8237 | 0.004  |
| 14496 | 948.0016  | 6.0126 | 0.8161 | 0.004  |
| 11481 | 950.7527  | 7.9699 | 0.8136 | 0.004  |
| 2238  | 952.5798  | 1.8776 | 0.8091 | 0.004  |
| 3409  | 954.0189  | 7.0308 | 0.8036 | 0.004  |
| 7085  | 968.9806  | 7.461  | 0.8268 | 0.0042 |
| 4995  | 972.4054  | 5.7722 | 0.8259 | 0.0042 |
| 2975  | 973.5752  | 6.5512 | 0.8202 | 0.0042 |
| 18567 | 975.0206  | 4.8757 | 0.8157 | 0.0043 |
| 4949  | 976.7831  | 7.18   | 0.8131 | 0.0043 |
| 4197  | 978.2579  | 5.2051 | 0.8082 | 0.0043 |
| 511   | 982.5718  | 2.4103 | 0.8088 | 0.0043 |
| 19435 | 985.1269  | 7.5141 | 0.8064 | 0.0044 |
| 11073 | 990.6872  | 7.26   | 0.8093 | 0.0044 |
| 1573  | 995.1837  | 5.8851 | 0.8111 | 0.0045 |
| 5342  | 1000.1706 | 7.1207 | 0.8143 | 0.0045 |
| 9524  | 1002.2519 | 5.9306 | 0.811  | 0.0046 |
| 4255  | 1004.5629 | 6.0746 | 0.8092 | 0.0046 |
| 19020 | 1009.203  | 6.2117 | 0.8138 | 0.0047 |
| 11302 | 1015.1549 | 5.5833 | 0.8185 | 0.0047 |
| 19458 | 1016.0979 | 6.5325 | 0.8138 | 0.0047 |
| 8595  | 1018.1608 | 4.9566 | 0.8108 | 0.0048 |
| 3445  | 1020.0574 | 6.9679 | 0.8082 | 0.0048 |
| 4022  | 1020.5665 | 5.0751 | 0.803  | 0.0048 |
| 11332 | 1030.3032 | 6.9961 | 0.8167 | 0.0049 |
| 3436  | 1032.9179 | 3.6718 | 0.8153 | 0.0049 |
| 11555 | 1036.5376 | 4.0787 | 0.816  | 0.005  |
| 17872 | 1037.9558 | 6.538  | 0.8129 | 0.005  |
| 11150 | 1039.2515 | 5.1207 | 0.8083 | 0.005  |
| 14807 | 1045.8559 | 6.8323 | 0.8166 | 0.0051 |
| 15192 | 1048.7637 | 6.74   | 0.8162 | 0.0051 |
| 1445  | 1052.1035 | 5.6417 | 0.8166 | 0.0052 |
| 11832 | 1053.1761 | 7.3667 | 0.8118 | 0.0052 |
| 15407 | 1058.2841 | 3.8215 | 0.8174 | 0.0053 |

|       |           |        |        |        |
|-------|-----------|--------|--------|--------|
| 6140  | 1062.6321 | 5.2321 | 0.8183 | 0.0053 |
| 801   | 1062.9479 | 4.5702 | 0.8129 | 0.0053 |
| 6730  | 1067.2238 | 4.4871 | 0.8152 | 0.0054 |
| 11351 | 1068.9763 | 5.8614 | 0.8121 | 0.0054 |
| 9400  | 1070.4883 | 5.841  | 0.8094 | 0.0054 |
| 16969 | 1070.7503 | 4.3889 | 0.8043 | 0.0054 |
| 806   | 1072.7332 | 6.6782 | 0.8033 | 0.0055 |
| 14162 | 1073.8042 | 6.5044 | 0.8    | 0.0055 |
| 19212 | 1075.7003 | 6.8255 | 0.7988 | 0.0055 |
| 18270 | 1079.0171 | 5.3521 | 0.7999 | 0.0056 |
| 4547  | 1080.368  | 6.7928 | 0.7969 | 0.0056 |
| 15566 | 1080.5367 | 5.7157 | 0.7913 | 0.0056 |
| 4409  | 1084.2719 | 6.6729 | 0.7926 | 0.0056 |
| 315   | 1088.0087 | 6.0068 | 0.7947 | 0.0057 |
| 12220 | 1091.6912 | 6.6778 | 0.7968 | 0.0057 |
| 7783  | 1093.7095 | 3.4448 | 0.7955 | 0.0058 |
| 15044 | 1107.6622 | 6.4654 | 0.8183 | 0.006  |
| 15581 | 1109.493  | 5.7059 | 0.8159 | 0.006  |
| 2789  | 1110.733  | 5.4777 | 0.8128 | 0.006  |
| 18639 | 1111.502  | 6.2884 | 0.8088 | 0.006  |
| 7222  | 1111.7514 | 6.3166 | 0.804  | 0.006  |
| 18328 | 1113.3493 | 6.0493 | 0.8021 | 0.006  |
| 3305  | 1116.6836 | 6.394  | 0.8014 | 0.0061 |
| 6084  | 1119.2188 | 4.9398 | 0.8015 | 0.0061 |
| 4730  | 1119.8573 | 6.172  | 0.7971 | 0.0061 |
| 16765 | 1123.1622 | 6.123  | 0.7982 | 0.0062 |
| 8364  | 1126.8616 | 6.4074 | 0.7994 | 0.0062 |
| 13496 | 1128.5482 | 6.3849 | 0.7981 | 0.0062 |
| 5320  | 1130.3195 | 6.2318 | 0.7968 | 0.0063 |
| 2097  | 1131.5847 | 6.1089 | 0.7944 | 0.0063 |
| 13803 | 1133.1659 | 6.5497 | 0.7926 | 0.0063 |
| 17777 | 1134.1778 | 6.1077 | 0.7898 | 0.0063 |
| 2443  | 1134.181  | 5.7408 | 0.785  | 0.0063 |
| 20186 | 1144.3521 | 4.7685 | 0.7986 | 0.0065 |

|       |           |        |        |        |
|-------|-----------|--------|--------|--------|
| 12351 | 1144.3654 | 6.1616 | 0.7938 | 0.0065 |
| 7465  | 1146.1469 | 6.1366 | 0.7933 | 0.0065 |
| 16489 | 1146.8905 | 6.126  | 0.7901 | 0.0065 |
| 20435 | 1153.7259 | 5.0305 | 0.7977 | 0.0066 |
| 4748  | 1154.0233 | 6.1599 | 0.7932 | 0.0066 |
| 2493  | 1159.7059 | 5.4402 | 0.7976 | 0.0067 |
| 18797 | 1160.1806 | 5.5622 | 0.7936 | 0.0067 |
| 2333  | 1164.5254 | 4.3723 | 0.7977 | 0.0068 |
| 17460 | 1172.2155 | 3.3711 | 0.8067 | 0.0069 |
| 19274 | 1174.2822 | 5.1973 | 0.8055 | 0.0069 |
| 12041 | 1174.8594 | 6.6201 | 0.8018 | 0.0069 |
| 13391 | 1175.072  | 5.7623 | 0.7978 | 0.0069 |
| 3904  | 1183.5121 | 5.0875 | 0.807  | 0.0071 |
| 2362  | 1185.6767 | 2.4583 | 0.8055 | 0.0071 |
| 4315  | 1186.1432 | 6.2015 | 0.8019 | 0.0071 |
| 4000  | 1187.2889 | 5.9935 | 0.7997 | 0.0071 |
| 13607 | 1188.1127 | 4.9596 | 0.7972 | 0.0071 |
| 14674 | 1189.69   | 5.6547 | 0.795  | 0.0071 |
| 1871  | 1192.3355 | 6.366  | 0.7952 | 0.0072 |
| 12915 | 1195.5502 | 5.4742 | 0.7963 | 0.0072 |
| 13123 | 1200.226  | 6.1834 | 0.8002 | 0.0073 |
| 9451  | 1201.1691 | 5.9012 | 0.7978 | 0.0073 |
| 12678 | 1201.2969 | 5.7394 | 0.7938 | 0.0073 |
| 1943  | 1201.3426 | 6.168  | 0.7897 | 0.0073 |
| 4228  | 1202.2561 | 5.4832 | 0.7873 | 0.0073 |
| 17666 | 1202.6429 | 6.0313 | 0.784  | 0.0074 |
| 6217  | 1204.4949 | 2.8607 | 0.7833 | 0.0074 |
| 17921 | 1205.436  | 5.3506 | 0.7805 | 0.0074 |
| 11118 | 1206.8739 | 5.8474 | 0.7785 | 0.0074 |
| 18222 | 1207.1659 | 5.2154 | 0.775  | 0.0074 |
| 6385  | 1210.2963 | 5.9034 | 0.7756 | 0.0075 |
| 19997 | 1214.1185 | 6.1881 | 0.7774 | 0.0075 |
| 15318 | 1214.5023 | 5.7455 | 0.7743 | 0.0075 |
| 3957  | 1216.3513 | 6.2077 | 0.7737 | 0.0076 |

|       |           |        |        |        |
|-------|-----------|--------|--------|--------|
| 5032  | 1217.3442 | 5.1702 | 0.7718 | 0.0076 |
| 4159  | 1217.6047 | 4.4829 | 0.7683 | 0.0076 |
| 18756 | 1218.3544 | 6.4452 | 0.7657 | 0.0076 |
| 5113  | 1219.4485 | 5.9535 | 0.7639 | 0.0076 |
| 15573 | 1220.0028 | 6.3663 | 0.7612 | 0.0076 |
| 9935  | 1224.0272 | 6.1764 | 0.7646 | 0.0077 |
| 8497  | 1228.8092 | 5.7431 | 0.7672 | 0.0078 |
| 18240 | 1229.439  | 6.2077 | 0.7649 | 0.0078 |
| 9823  | 1230.9486 | 5.3755 | 0.7634 | 0.0078 |
| 3408  | 1233.6929 | 6.1667 | 0.7646 | 0.0078 |
| 12018 | 1233.9521 | 5.8541 | 0.7613 | 0.0079 |
| 8508  | 1236.9513 | 5.4877 | 0.7619 | 0.0079 |
| 14392 | 1238.6848 | 5.9269 | 0.7611 | 0.0079 |
| 18977 | 1241.169  | 2.7196 | 0.7614 | 0.008  |
| 13304 | 1242.2771 | 6.0399 | 0.7593 | 0.008  |
| 4771  | 1246.4024 | 5.2535 | 0.7614 | 0.008  |
| 15426 | 1247.2163 | 6.0686 | 0.759  | 0.0081 |
| 8612  | 1249.6297 | 5.5815 | 0.7592 | 0.0081 |
| 7579  | 1250.5929 | 5.2175 | 0.7569 | 0.0081 |
| 13785 | 1253.0701 | 4.7492 | 0.7571 | 0.0081 |
| 14547 | 1253.6064 | 5.8415 | 0.7545 | 0.0081 |
| 12482 | 1256.0369 | 5.8148 | 0.755  | 0.0082 |
| 8768  | 1258.325  | 5.8734 | 0.7546 | 0.0082 |
| 7291  | 1259.2882 | 2.9019 | 0.7527 | 0.0082 |
| 19874 | 1259.7183 | 3.2391 | 0.7498 | 0.0082 |
| 3462  | 1260.7652 | 5.6902 | 0.748  | 0.0083 |
| 15481 | 1261.6782 | 5.8911 | 0.746  | 0.0083 |
| 7481  | 1261.9667 | 6.3021 | 0.7433 | 0.0083 |
| 15107 | 1262.2568 | 4.2546 | 0.7404 | 0.0083 |
| 11124 | 1263.3886 | 5.5494 | 0.7389 | 0.0083 |
| 8396  | 1263.9294 | 3.6084 | 0.7366 | 0.0083 |
| 2923  | 1266.7504 | 5.0443 | 0.737  | 0.0084 |
| 20224 | 1267.42   | 5.9859 | 0.7349 | 0.0084 |
| 14779 | 1271.3404 | 5.4613 | 0.7372 | 0.0084 |

|       |           |        |        |        |
|-------|-----------|--------|--------|--------|
| 6588  | 1273.9587 | 5.7502 | 0.7377 | 0.0085 |
| 17129 | 1277.3527 | 5.944  | 0.7401 | 0.0085 |
| 6947  | 1279.3472 | 4.6211 | 0.7396 | 0.0086 |
| 13198 | 1281.2418 | 5.6777 | 0.7397 | 0.0086 |
| 11110 | 1281.3996 | 6.0374 | 0.7368 | 0.0086 |
| 11226 | 1282.0622 | 5.0858 | 0.7349 | 0.0086 |
| 9736  | 1282.4558 | 5.3125 | 0.7323 | 0.0086 |
| 617   | 1286.0104 | 5.3083 | 0.7351 | 0.0087 |
| 702   | 1286.1959 | 5.8328 | 0.7323 | 0.0087 |
| 15559 | 1286.9557 | 5.6605 | 0.7308 | 0.0087 |
| 2345  | 1289.1255 | 4.6146 | 0.7311 | 0.0088 |
| 5304  | 1292.0849 | 6.084  | 0.7329 | 0.0088 |
| 13945 | 1293.9373 | 4.534  | 0.7326 | 0.0088 |
| 4089  | 1294.5285 | 5.0627 | 0.7306 | 0.0089 |
| 3594  | 1295.3802 | 5.2972 | 0.7292 | 0.0089 |
| 12873 | 1297.2483 | 5.5241 | 0.7292 | 0.0089 |
| 14255 | 1300.7776 | 4.1947 | 0.7317 | 0.009  |
| 18644 | 1306.0097 | 5.3574 | 0.7366 | 0.0091 |
| 2398  | 1308.4269 | 5.8826 | 0.737  | 0.0091 |
| 7404  | 1308.5658 | 5.855  | 0.7346 | 0.0091 |
| 3020  | 1310.7393 | 2.8114 | 0.7349 | 0.0092 |
| 10726 | 1312.3523 | 5.0877 | 0.7342 | 0.0092 |
| 5029  | 1312.4129 | 5.9659 | 0.7314 | 0.0092 |
| 7509  | 1314.3799 | 5.6873 | 0.7314 | 0.0092 |
| 2137  | 1314.5323 | 5.6627 | 0.7288 | 0.0092 |
| 12149 | 1315.6778 | 4.991  | 0.7277 | 0.0092 |
| 18713 | 1320.981  | 5.346  | 0.7325 | 0.0093 |
| 3248  | 1325.3031 | 4.2538 | 0.736  | 0.0094 |
| 15185 | 1326.2264 | 4.4203 | 0.7346 | 0.0094 |
| 15366 | 1327.2549 | 5.2017 | 0.7333 | 0.0095 |
| 19791 | 1328.213  | 5.2816 | 0.732  | 0.0095 |
| 5938  | 1329.3128 | 5.5936 | 0.7305 | 0.0095 |
| 13727 | 1334.488  | 5.4996 | 0.7351 | 0.0096 |
| 7313  | 1335.2571 | 4.1917 | 0.7335 | 0.0096 |

|       |           |        |        |        |
|-------|-----------|--------|--------|--------|
| 16612 | 1335.7711 | 4.6475 | 0.7314 | 0.0096 |
| 14207 | 1336.203  | 4.9028 | 0.729  | 0.0096 |
| 17941 | 1338.9528 | 5.1958 | 0.7294 | 0.0097 |
| 6798  | 1343.5811 | 4.2527 | 0.7337 | 0.0098 |
| 8314  | 1344.3889 | 4.3186 | 0.7318 | 0.0098 |
| 11476 | 1344.4135 | 5.4673 | 0.7292 | 0.0098 |
| 19730 | 1347.8406 | 2.002  | 0.7312 | 0.0098 |
| 14033 | 1350.2667 | 4.2085 | 0.7326 | 0.0099 |
| 7612  | 1352.7677 | 5.486  | 0.7338 | 0.0099 |
| 15444 | 1356.2696 | 5.4548 | 0.7365 | 0.01   |
| 148   | 1356.5096 | 5.6919 | 0.7344 | 0.01   |
| 4442  | 1356.742  | 4.6785 | 0.7321 | 0.01   |
| 17378 | 1357.4126 | 4.9811 | 0.7304 | 0.01   |
| 15023 | 1357.5255 | 5.5451 | 0.728  | 0.01   |
| 8344  | 1367.0513 | 3.7845 | 0.7396 | 0.0102 |
| 11003 | 1367.9967 | 3.8746 | 0.7381 | 0.0102 |
| 1654  | 1368.3752 | 4.5301 | 0.7361 | 0.0103 |
| 12910 | 1369.5259 | 4.5356 | 0.7351 | 0.0103 |
| 18822 | 1377.5328 | 5.2439 | 0.743  | 0.0104 |
| 15544 | 1378.0068 | 5.5199 | 0.741  | 0.0104 |
| 4986  | 1381.1471 | 5.2971 | 0.7434 | 0.0105 |
| 18522 | 1381.6001 | 5.5488 | 0.7417 | 0.0105 |
| 10520 | 1384.0474 | 4.5593 | 0.7427 | 0.0106 |
| 7356  | 1384.4973 | 4.8603 | 0.7408 | 0.0106 |
| 15429 | 1386.0953 | 4.953  | 0.7399 | 0.0106 |
| 18786 | 1389.2993 | 5.3996 | 0.7421 | 0.0107 |
| 6681  | 1390.1909 | 5.5015 | 0.7406 | 0.0107 |
| 11347 | 1390.6283 | 5.1682 | 0.7386 | 0.0107 |
| 18212 | 1391.5061 | 5.692  | 0.737  | 0.0107 |
| 11101 | 1391.8941 | 3.7229 | 0.7349 | 0.0107 |
| 17187 | 1392.8644 | 5.124  | 0.7337 | 0.0107 |
| 13900 | 1397.1601 | 4.2986 | 0.7364 | 0.0108 |
| 15206 | 1397.4342 | 4.6164 | 0.7343 | 0.0108 |
| 14148 | 1398.6622 | 5.1688 | 0.7333 | 0.0108 |



|       |           |        |        |        |
|-------|-----------|--------|--------|--------|
| 7925  | 1400.7561 | 1.7581 | 0.734  | 0.0109 |
| 18514 | 1403.6539 | 5.6855 | 0.7351 | 0.0109 |
| 15293 | 1403.7788 | 5.1613 | 0.7327 | 0.0109 |
| 19331 | 1404.1257 | 4.9724 | 0.7308 | 0.0109 |
| 17442 | 1404.8307 | 4.9157 | 0.7293 | 0.0109 |
| 15422 | 1405.9309 | 5.3718 | 0.7283 | 0.011  |
| 8280  | 1406.3911 | 5.4845 | 0.7265 | 0.011  |
| 7338  | 1414.0332 | 5.2133 | 0.7345 | 0.0111 |
| 9406  | 1414.2118 | 5.3398 | 0.7324 | 0.0111 |
| 14544 | 1414.4693 | 5.2885 | 0.7304 | 0.0111 |
| 15602 | 1418.5336 | 4.9774 | 0.7335 | 0.0112 |
| 4483  | 1425.4427 | 5.4911 | 0.7392 | 0.0113 |
| 4350  | 1429.0875 | 2.3453 | 0.7411 | 0.0114 |
| 4622  | 1429.1851 | 4.4967 | 0.7389 | 0.0114 |
| 11339 | 1430.6097 | 4.8305 | 0.7384 | 0.0114 |
| 20353 | 1431.4253 | 4.4805 | 0.7372 | 0.0115 |
| 15200 | 1432.9811 | 5.5315 | 0.7378 | 0.0115 |
| 3577  | 1434.4429 | 5.102  | 0.7375 | 0.0115 |
| 235   | 1436.3443 | 5.5576 | 0.7374 | 0.0116 |
| 13439 | 1437.1476 | 5.0182 | 0.7361 | 0.0116 |
| 17738 | 1438.8172 | 4.7416 | 0.7361 | 0.0116 |
| 8881  | 1442.0002 | 5.3091 | 0.7373 | 0.0117 |
| 14290 | 1442.5508 | 4.381  | 0.7358 | 0.0117 |
| 16619 | 1443.6697 | 4.872  | 0.7348 | 0.0117 |
| 297   | 1446.3401 | 4.4921 | 0.7359 | 0.0118 |
| 15328 | 1448.2448 | 4.2772 | 0.7359 | 0.0118 |
| 18771 | 1450.0574 | 4.4878 | 0.7359 | 0.0118 |
| 16609 | 1451.1972 | 4.3414 | 0.735  | 0.0119 |
| 3667  | 1452.707  | 5.2496 | 0.7344 | 0.0119 |
| 4113  | 1454.7544 | 4.6226 | 0.7343 | 0.0119 |
| 1284  | 1454.9917 | 4.2524 | 0.7322 | 0.0119 |
| 15695 | 1455.833  | 3.7312 | 0.731  | 0.0119 |
| 7157  | 1455.9649 | 4.5854 | 0.7291 | 0.0119 |
| 19955 | 1457.4951 | 4.2163 | 0.729  | 0.012  |

|       |           |        |        |        |
|-------|-----------|--------|--------|--------|
| 7694  | 1459.6039 | 4.3275 | 0.7293 | 0.012  |
| 20216 | 1463.6625 | 5.0396 | 0.7321 | 0.0121 |
| 2132  | 1465.6679 | 4.5827 | 0.7321 | 0.0121 |
| 15525 | 1469.839  | 4.6988 | 0.7351 | 0.0122 |
| 9749  | 1472.363  | 5.2368 | 0.7365 | 0.0123 |
| 11363 | 1477.5105 | 3.9247 | 0.7406 | 0.0124 |
| 5841  | 1481.2713 | 4.5361 | 0.7428 | 0.0125 |
| 15060 | 1482.7058 | 5.0863 | 0.7423 | 0.0125 |
| 1404  | 1483.1087 | 4.9902 | 0.7405 | 0.0125 |
| 3421  | 1483.3503 | 4.444  | 0.7387 | 0.0125 |
| 12668 | 1487.3165 | 3.2884 | 0.7408 | 0.0126 |
| 9157  | 1489.8925 | 5.1132 | 0.7422 | 0.0126 |
| 9781  | 1494.538  | 5.3308 | 0.7471 | 0.0127 |
| 3791  | 1498.9683 | 4.2342 | 0.7507 | 0.0128 |
| 17601 | 1502.794  | 4.5836 | 0.7533 | 0.0129 |
| 2462  | 1506.7567 | 4.9945 | 0.7564 | 0.013  |
| 15507 | 1509.2384 | 5.0737 | 0.7578 | 0.0131 |
| 17814 | 1509.6366 | 4.3433 | 0.7561 | 0.0131 |
| 14445 | 1512.0989 | 4.9008 | 0.757  | 0.0131 |
| 12278 | 1516.1447 | 3.204  | 0.7597 | 0.0132 |
| 11310 | 1516.2681 | 4.9956 | 0.7578 | 0.0132 |
| 3021  | 1519.566  | 4.9989 | 0.7595 | 0.0133 |
| 19879 | 1520.8757 | 4.9472 | 0.759  | 0.0133 |
| 5447  | 1528.5779 | 3.8416 | 0.7664 | 0.0135 |
| 10145 | 1529.6857 | 4.9367 | 0.7653 | 0.0135 |
| 19813 | 1533.3698 | 5.0281 | 0.7673 | 0.0136 |
| 14316 | 1536.5744 | 4.4697 | 0.7693 | 0.0136 |
| 11283 | 1539.5003 | 4.8687 | 0.7709 | 0.0137 |
| 18458 | 1542.4573 | 4.6965 | 0.7722 | 0.0138 |
| 18556 | 1547.2846 | 4.9358 | 0.776  | 0.0139 |
| 15785 | 1547.6575 | 3.351  | 0.7743 | 0.0139 |
| 15034 | 1547.9147 | 5.1974 | 0.7725 | 0.0139 |
| 16814 | 1548.349  | 4.1985 | 0.7709 | 0.0139 |
| 16393 | 1549.0904 | 3.091  | 0.7696 | 0.0139 |

|       |           |        |        |        |
|-------|-----------|--------|--------|--------|
| 15933 | 1554.1601 | 5.1383 | 0.7741 | 0.014  |
| 17229 | 1555.4325 | 2.6182 | 0.7737 | 0.0141 |
| 18361 | 1556.4582 | 3.2953 | 0.7729 | 0.0141 |
| 4208  | 1557.8818 | 4.2577 | 0.7731 | 0.0141 |
| 12504 | 1560.6862 | 4.2198 | 0.775  | 0.0142 |
| 17743 | 1561.4066 | 4.7592 | 0.7738 | 0.0142 |
| 10900 | 1563.559  | 4.8645 | 0.774  | 0.0143 |
| 12990 | 1564.4741 | 3.3977 | 0.7732 | 0.0143 |
| 1965  | 1565.1739 | 3.2059 | 0.772  | 0.0143 |
| 15864 | 1565.2145 | 3.9866 | 0.77   | 0.0143 |
| 15066 | 1565.7768 | 4.9765 | 0.7686 | 0.0143 |
| 6270  | 1570.2321 | 2.9521 | 0.772  | 0.0144 |
| 12304 | 1570.9258 | 5.2058 | 0.7709 | 0.0144 |
| 13640 | 1572.5584 | 4.7578 | 0.7708 | 0.0145 |
| 8479  | 1572.7884 | 4.0687 | 0.7691 | 0.0145 |
| 14082 | 1572.9167 | 4.1026 | 0.7673 | 0.0145 |
| 1264  | 1573.042  | 3.4204 | 0.7655 | 0.0145 |
| 15542 | 1574.8614 | 4.3853 | 0.7662 | 0.0145 |
| 6537  | 1576.078  | 5.0849 | 0.7657 | 0.0146 |
| 12101 | 1577.695  | 4.7569 | 0.7657 | 0.0146 |
| 15205 | 1579.6945 | 5.0353 | 0.7656 | 0.0146 |
| 14970 | 1581.8596 | 4.5913 | 0.7662 | 0.0147 |
| 5349  | 1582.3503 | 1.0402 | 0.765  | 0.0147 |
| 13775 | 1582.676  | 3.1797 | 0.7634 | 0.0147 |
| 15313 | 1587.2811 | 4.9292 | 0.7669 | 0.0148 |
| 16369 | 1588.2925 | 5.0244 | 0.7662 | 0.0148 |
| 14876 | 1588.4545 | 4.503  | 0.7645 | 0.0148 |
| 11184 | 1588.9866 | 4.671  | 0.7631 | 0.0148 |
| 8107  | 1593.0606 | 4.4301 | 0.7663 | 0.0149 |
| 18235 | 1593.413  | 4.3242 | 0.7647 | 0.0149 |
| 14371 | 1593.6901 | 4.3399 | 0.763  | 0.015  |
| 10848 | 1593.8258 | 4.5829 | 0.7612 | 0.015  |
| 9361  | 1599.4193 | 4.7706 | 0.766  | 0.0151 |
| 19098 | 1602.9699 | 3.9439 | 0.7677 | 0.0152 |

|       |           |        |        |        |
|-------|-----------|--------|--------|--------|
| 15260 | 1603.9175 | 4.7006 | 0.7668 | 0.0152 |
| 4941  | 1610.001  | 4.9306 | 0.7725 | 0.0153 |
| 18642 | 1610.3516 | 4.2451 | 0.771  | 0.0153 |
| 18705 | 1611.2346 | 3.8809 | 0.7703 | 0.0154 |
| 8696  | 1615.4939 | 4.6055 | 0.7734 | 0.0155 |
| 10327 | 1616.8444 | 4.2813 | 0.773  | 0.0155 |
| 15431 | 1618.0405 | 3.6513 | 0.7726 | 0.0155 |
| 20387 | 1618.056  | 3.2418 | 0.7708 | 0.0155 |
| 8697  | 1619.5213 | 4.721  | 0.7702 | 0.0155 |
| 3586  | 1620.2071 | 4.3053 | 0.7691 | 0.0156 |
| 18789 | 1620.8386 | 4.5258 | 0.7679 | 0.0156 |
| 1762  | 1621.8811 | 4.7382 | 0.7673 | 0.0156 |
| 20059 | 1623.2778 | 4.2736 | 0.7669 | 0.0156 |
| 7885  | 1624.1809 | 4.8333 | 0.7664 | 0.0157 |
| 10971 | 1626.1533 | 4.9843 | 0.767  | 0.0157 |
| 15841 | 1627.1699 | 4.7447 | 0.7664 | 0.0157 |
| 11702 | 1629.1013 | 4.907  | 0.7668 | 0.0158 |
| 18278 | 1629.4949 | 3.9292 | 0.7656 | 0.0158 |
| 3414  | 1630.7351 | 4.0881 | 0.7652 | 0.0158 |
| 2084  | 1635.9178 | 2.7259 | 0.7691 | 0.0159 |
| 12826 | 1636.3141 | 3.5752 | 0.7677 | 0.0159 |
| 15988 | 1639.8394 | 4.5926 | 0.7699 | 0.016  |
| 14260 | 1639.9426 | 4.8429 | 0.7682 | 0.016  |
| 16570 | 1640.5328 | 4.308  | 0.7671 | 0.016  |
| 4683  | 1647.3126 | 4.5857 | 0.7727 | 0.0162 |
| 14890 | 1651.5912 | 4.2596 | 0.7756 | 0.0163 |
| 9241  | 1658.3293 | 3.5061 | 0.7815 | 0.0165 |
| 17259 | 1660.389  | 2.951  | 0.7821 | 0.0165 |
| 20168 | 1665.6881 | 4.49   | 0.7861 | 0.0166 |
| 16746 | 1666.4663 | 3.9355 | 0.7853 | 0.0167 |
| 16648 | 1666.8895 | 4.061  | 0.784  | 0.0167 |
| 18969 | 1671.116  | 4.5553 | 0.7871 | 0.0168 |
| 17949 | 1673.3068 | 4.4369 | 0.7878 | 0.0168 |
| 6990  | 1677.5597 | 4.6968 | 0.7911 | 0.0169 |

|       |           |        |        |        |
|-------|-----------|--------|--------|--------|
| 13620 | 1681.076  | 3.8613 | 0.793  | 0.017  |
| 17752 | 1684.0006 | 4.5608 | 0.795  | 0.0171 |
| 1879  | 1684.0203 | 4.6223 | 0.7932 | 0.0171 |
| 4876  | 1684.7644 | 4.6254 | 0.7922 | 0.0171 |
| 3320  | 1685.9266 | 1.8342 | 0.7918 | 0.0171 |
| 5122  | 1686.7949 | 4.716  | 0.7911 | 0.0172 |
| 9060  | 1687.1982 | 3.3202 | 0.7897 | 0.0172 |
| 770   | 1694.1004 | 4.3122 | 0.7958 | 0.0173 |
| 18059 | 1696.3868 | 4.018  | 0.7965 | 0.0174 |
| 17556 | 1698.3432 | 4.2381 | 0.7972 | 0.0175 |
| 3644  | 1698.7579 | 2.8178 | 0.7959 | 0.0175 |
| 16795 | 1699.9393 | 3.5196 | 0.7958 | 0.0175 |
| 6313  | 1703.2923 | 4.6184 | 0.7979 | 0.0176 |
| 17091 | 1704.4484 | 4.5865 | 0.7974 | 0.0176 |
| 13533 | 1705.1722 | 4.5382 | 0.7963 | 0.0176 |
| 9830  | 1706.7737 | 2.9913 | 0.7966 | 0.0177 |
| 10043 | 1706.7915 | 3.9142 | 0.7949 | 0.0177 |
| 11526 | 1707.6504 | 4.8075 | 0.794  | 0.0177 |
| 6633  | 1708.7257 | 1.0742 | 0.7936 | 0.0177 |
| 15342 | 1709.3887 | 4.0215 | 0.7926 | 0.0177 |
| 1664  | 1710.4746 | 4.1212 | 0.7919 | 0.0178 |
| 2292  | 1710.5513 | 3.5845 | 0.7903 | 0.0178 |
| 9494  | 1711.6724 | 3.8659 | 0.7899 | 0.0178 |
| 19660 | 1713.6996 | 4.6904 | 0.7906 | 0.0179 |
| 3618  | 1714.3414 | 0.8337 | 0.7897 | 0.0179 |
| 11371 | 1715.2975 | 4.131  | 0.789  | 0.0179 |
| 15437 | 1720.4264 | 3.288  | 0.7938 | 0.018  |
| 13973 | 1720.6322 | 3.7493 | 0.7924 | 0.018  |
| 7029  | 1723.2309 | 4.3831 | 0.7937 | 0.0181 |
| 18273 | 1725.8241 | 4.7623 | 0.7947 | 0.0182 |
| 15614 | 1731.1465 | 4.6727 | 0.7997 | 0.0183 |
| 10028 | 1732.6868 | 3.7978 | 0.7992 | 0.0184 |
| 14409 | 1733.4322 | 2.9074 | 0.7983 | 0.0184 |
| 17885 | 1736.3741 | 4.4286 | 0.8001 | 0.0185 |

|       |           |        |        |        |
|-------|-----------|--------|--------|--------|
| 2859  | 1737.5598 | 4.6021 | 0.7998 | 0.0185 |
| 700   | 1740.8445 | 4.3195 | 0.8012 | 0.0186 |
| 17042 | 1741.1026 | 4.4623 | 0.7997 | 0.0186 |
| 15826 | 1741.335  | 4.2682 | 0.7984 | 0.0186 |
| 10734 | 1742.4347 | 3.4195 | 0.798  | 0.0186 |
| 8523  | 1743.0685 | 4.2842 | 0.7969 | 0.0186 |
| 9593  | 1743.7895 | 3.9254 | 0.7961 | 0.0186 |
| 18363 | 1745.7536 | 3.6946 | 0.7965 | 0.0187 |
| 19789 | 1746.3458 | 4.4563 | 0.7956 | 0.0187 |
| 7707  | 1746.7381 | 4.3746 | 0.7943 | 0.0187 |
| 17024 | 1748.8388 | 3.7957 | 0.7949 | 0.0188 |
| 14225 | 1749.8669 | 4.4287 | 0.7943 | 0.0188 |
| 11344 | 1750.2718 | 4.743  | 0.7931 | 0.0188 |
| 18794 | 1750.8757 | 4.3968 | 0.7921 | 0.0188 |
| 14804 | 1754.4903 | 4.2917 | 0.7943 | 0.0189 |
| 7383  | 1757.1056 | 3.949  | 0.7957 | 0.019  |
| 1488  | 1758.0756 | 3.5852 | 0.7956 | 0.019  |
| 14801 | 1758.168  | 4      | 0.794  | 0.019  |
| 4558  | 1759.7763 | 4.1819 | 0.794  | 0.0191 |
| 18092 | 1760.7232 | 4.4516 | 0.7935 | 0.0191 |
| 18507 | 1761.7714 | 3.7671 | 0.793  | 0.0191 |
| 4289  | 1763.3749 | 4.4743 | 0.7927 | 0.0191 |
| 13667 | 1764.6821 | 4.2807 | 0.7926 | 0.0192 |
| 1065  | 1764.943  | 3.71   | 0.7913 | 0.0192 |
| 15433 | 1765.2041 | 4.6376 | 0.7899 | 0.0192 |
| 8638  | 1765.5292 | 3.3647 | 0.7888 | 0.0192 |
| 15346 | 1766.2467 | 3.5618 | 0.788  | 0.0192 |
| 17379 | 1767.0028 | 2.9511 | 0.7872 | 0.0192 |
| 2664  | 1767.0315 | 4.0794 | 0.7856 | 0.0192 |
| 2093  | 1768.1673 | 4.4218 | 0.7853 | 0.0193 |
| 10946 | 1769.5488 | 4.1905 | 0.7852 | 0.0193 |
| 15532 | 1771.8609 | 4.4175 | 0.7861 | 0.0194 |
| 825   | 1774.7532 | 3.2032 | 0.7879 | 0.0194 |
| 17933 | 1775.2532 | 4.2596 | 0.7868 | 0.0195 |

|       |           |        |        |        |
|-------|-----------|--------|--------|--------|
| 4485  | 1776.1611 | 4.4239 | 0.786  | 0.0195 |
| 10889 | 1776.6923 | 4.5094 | 0.7851 | 0.0195 |
| 17867 | 1777.3471 | 4.3255 | 0.7843 | 0.0195 |
| 14332 | 1777.5307 | 4.5911 | 0.7829 | 0.0195 |
| 14592 | 1777.6266 | 4.4648 | 0.7815 | 0.0195 |
| 18153 | 1779.6775 | 4.1732 | 0.7823 | 0.0196 |
| 20405 | 1779.9173 | 4.1755 | 0.7811 | 0.0196 |
| 10882 | 1779.9831 | 3.7521 | 0.7797 | 0.0196 |
| 6851  | 1781.9157 | 4.6107 | 0.7805 | 0.0196 |
| 7729  | 1782.2511 | 4.3305 | 0.7794 | 0.0197 |
| 3821  | 1782.3696 | 3.0101 | 0.778  | 0.0197 |
| 17948 | 1782.6612 | 4.598  | 0.7768 | 0.0197 |
| 3797  | 1783.0689 | 3.8994 | 0.7759 | 0.0197 |
| 3390  | 1783.4818 | 3.7199 | 0.7749 | 0.0197 |
| 19472 | 1784.3717 | 4.358  | 0.7744 | 0.0197 |
| 13551 | 1785.3979 | 4.7063 | 0.774  | 0.0197 |
| 1446  | 1787.8714 | 3.9212 | 0.775  | 0.0198 |
| 1619  | 1788.2086 | 4.3946 | 0.7739 | 0.0198 |
| 15238 | 1788.4428 | 3.369  | 0.7726 | 0.0198 |
| 6924  | 1790.2788 | 2.4175 | 0.7726 | 0.0199 |
| 4583  | 1790.3787 | 4.1525 | 0.7712 | 0.0199 |
| 6816  | 1790.7987 | 4.5947 | 0.7705 | 0.0199 |
| 10179 | 1795.742  | 3.5926 | 0.7747 | 0.02   |
| 8495  | 1795.9118 | 4.4897 | 0.7734 | 0.02   |
| 2615  | 1797.2645 | 4.5476 | 0.7735 | 0.0201 |
| 4968  | 1797.3641 | 4.3897 | 0.7721 | 0.0201 |
| 19137 | 1798.3959 | 4.5008 | 0.772  | 0.0201 |
| 7302  | 1799.5352 | 4.3368 | 0.7718 | 0.0201 |
| 4599  | 1802.7784 | 4.3157 | 0.7739 | 0.0202 |
| 13790 | 1803.7685 | 4.3098 | 0.7735 | 0.0203 |
| 5402  | 1805.9582 | 4.4417 | 0.7742 | 0.0203 |
| 15032 | 1807.805  | 3.226  | 0.7749 | 0.0204 |
| 18146 | 1810.0286 | 4.1077 | 0.7759 | 0.0204 |
| 8763  | 1810.1295 | 3.8805 | 0.7746 | 0.0204 |

|       |           |        |        |        |
|-------|-----------|--------|--------|--------|
| 7685  | 1812.6632 | 4.2639 | 0.7756 | 0.0205 |
| 9288  | 1813.1259 | 3.8959 | 0.7746 | 0.0205 |
| 17355 | 1813.4901 | 4.3515 | 0.7735 | 0.0205 |
| 17563 | 1815.1115 | 4.6019 | 0.7738 | 0.0206 |
| 14984 | 1815.2401 | 4.3082 | 0.7726 | 0.0206 |
| 9347  | 1815.5882 | 4.3009 | 0.7715 | 0.0206 |
| 19323 | 1816.4005 | 4.402  | 0.7709 | 0.0206 |
| 7435  | 1817.3701 | 4.3034 | 0.7705 | 0.0206 |
| 11989 | 1822.6813 | 3.9049 | 0.7743 | 0.0208 |
| 13430 | 1823.566  | 3.5197 | 0.7738 | 0.0208 |
| 7706  | 1825.9642 | 3.9956 | 0.7748 | 0.0209 |
| 15113 | 1826.5304 | 4.5274 | 0.774  | 0.0209 |
| 7386  | 1826.9571 | 3.9569 | 0.7732 | 0.0209 |
| 15527 | 1827.2588 | 2.9763 | 0.7722 | 0.0209 |
| 17302 | 1827.632  | 4.0713 | 0.7712 | 0.0209 |
| 11296 | 1830.8642 | 3.9512 | 0.7727 | 0.021  |
| 17154 | 1832.8357 | 2.908  | 0.7734 | 0.0211 |
| 12367 | 1833.2583 | 2.73   | 0.7725 | 0.0211 |
| 5421  | 1834.602  | 3.7051 | 0.7725 | 0.0211 |
| 19423 | 1840.3338 | 4.2144 | 0.7775 | 0.0213 |
| 18840 | 1841.0856 | 3.1794 | 0.7768 | 0.0213 |
| 14864 | 1844.3079 | 4.1627 | 0.7789 | 0.0214 |
| 6074  | 1845.5596 | 3.8852 | 0.779  | 0.0214 |
| 14534 | 1845.6797 | 3.7617 | 0.7777 | 0.0214 |
| 12524 | 1848.6621 | 3.6174 | 0.7793 | 0.0215 |
| 14559 | 1849.3509 | 1.9978 | 0.7786 | 0.0215 |
| 124   | 1849.9317 | 3.9098 | 0.7778 | 0.0216 |
| 14520 | 1854.4529 | 3.6539 | 0.781  | 0.0217 |
| 18499 | 1855.0689 | 4.21   | 0.7805 | 0.0217 |
| 14810 | 1857.3192 | 4.3583 | 0.7814 | 0.0218 |
| 8907  | 1857.6739 | 4.1415 | 0.7804 | 0.0218 |
| 1380  | 1857.803  | 4.0557 | 0.7791 | 0.0218 |
| 15403 | 1859.6272 | 4.1263 | 0.7798 | 0.0218 |
| 8810  | 1860.5922 | 4.4074 | 0.7793 | 0.0219 |



|       |           |        |        |        |
|-------|-----------|--------|--------|--------|
| 14321 | 1862.2513 | 3.3847 | 0.7796 | 0.0219 |
| 7269  | 1863.9257 | 3.924  | 0.7801 | 0.022  |
| 7239  | 1864.0814 | 3.2808 | 0.7789 | 0.022  |
| 14614 | 1865.2332 | 4.0593 | 0.7786 | 0.022  |
| 385   | 1865.3665 | 4.352  | 0.7773 | 0.022  |
| 8830  | 1866.2829 | 3.3953 | 0.7769 | 0.022  |
| 14994 | 1866.7165 | 4.161  | 0.7759 | 0.022  |
| 12242 | 1867.4652 | 3.7732 | 0.7755 | 0.0221 |
| 14073 | 1867.6802 | 3.0638 | 0.7743 | 0.0221 |
| 13688 | 1868.1597 | 4.4068 | 0.7734 | 0.0221 |
| 7742  | 1870.3112 | 4.1462 | 0.774  | 0.0221 |
| 18081 | 1872.853  | 4.0607 | 0.7753 | 0.0222 |
| 4892  | 1873.4386 | 3.913  | 0.7747 | 0.0222 |
| 15432 | 1873.9618 | 4.2966 | 0.7739 | 0.0222 |
| 11337 | 1875.7156 | 3.9392 | 0.7745 | 0.0223 |
| 6734  | 1876.0832 | 4.0114 | 0.7735 | 0.0223 |
| 13791 | 1876.6918 | 4.3779 | 0.7728 | 0.0223 |
| 11202 | 1877.1237 | 3.8843 | 0.7717 | 0.0223 |
| 2663  | 1877.8436 | 4.3642 | 0.7712 | 0.0224 |
| 17059 | 1878.5264 | 4.0924 | 0.7704 | 0.0224 |
| 7470  | 1880.312  | 3.8402 | 0.7712 | 0.0224 |
| 14899 | 1880.9212 | 2.8495 | 0.7708 | 0.0225 |
| 13623 | 1881.613  | 3.4435 | 0.7704 | 0.0225 |
| 11201 | 1883.7858 | 3.7442 | 0.7712 | 0.0225 |
| 15512 | 1883.9236 | 3.9166 | 0.77   | 0.0225 |
| 15427 | 1884.3628 | 4.3288 | 0.7691 | 0.0226 |
| 16672 | 1886.9848 | 3.4597 | 0.7703 | 0.0226 |
| 9021  | 1891.5075 | 4.3623 | 0.7732 | 0.0227 |
| 19792 | 1892.8859 | 2.4245 | 0.7732 | 0.0228 |
| 6921  | 1895.4224 | 2.613  | 0.7744 | 0.0229 |
| 13555 | 1896.3284 | 4.1296 | 0.7741 | 0.0229 |
| 13558 | 1897.6159 | 4.3594 | 0.7741 | 0.0229 |
| 14760 | 1898.4377 | 4.0193 | 0.7737 | 0.023  |
| 6983  | 1899.2625 | 2.8563 | 0.7732 | 0.023  |

|       |           |        |        |        |
|-------|-----------|--------|--------|--------|
| 19369 | 1903.0891 | 3.91   | 0.7759 | 0.0231 |
| 12694 | 1905.1915 | 4.1774 | 0.777  | 0.0232 |
| 19150 | 1905.5094 | 3.5605 | 0.776  | 0.0232 |
| 10811 | 1907.1655 | 4.203  | 0.7764 | 0.0232 |
| 4505  | 1909.1902 | 3.2486 | 0.7769 | 0.0233 |
| 19396 | 1909.5625 | 3.5329 | 0.776  | 0.0233 |
| 11522 | 1910.376  | 3.5587 | 0.7755 | 0.0233 |
| 10879 | 1911.3201 | 3.0943 | 0.7752 | 0.0233 |
| 17822 | 1912.3687 | 4.1895 | 0.7749 | 0.0234 |
| 1610  | 1913.9514 | 3.8287 | 0.775  | 0.0234 |
| 19677 | 1914.123  | 4.0337 | 0.774  | 0.0234 |
| 11440 | 1915.0457 | 3.5716 | 0.7737 | 0.0234 |
| 20343 | 1916.7067 | 3.6976 | 0.7742 | 0.0235 |
| 9968  | 1916.7703 | 4.1828 | 0.773  | 0.0235 |
| 14631 | 1921.0331 | 3.3065 | 0.7759 | 0.0236 |
| 1459  | 1922.6724 | 3.6343 | 0.7765 | 0.0237 |
| 4520  | 1926.2636 | 3.6541 | 0.7787 | 0.0238 |
| 5910  | 1928.6859 | 4.0934 | 0.7803 | 0.0239 |
| 13939 | 1930.7915 | 3.0559 | 0.7812 | 0.0239 |
| 12780 | 1935.8811 | 3.3563 | 0.7846 | 0.0241 |
| 7970  | 1935.932  | 3.8521 | 0.7835 | 0.0241 |
| 3210  | 1936.2947 | 4.0882 | 0.7826 | 0.0241 |
| 5368  | 1936.4367 | 3.7776 | 0.7814 | 0.0241 |
| 4780  | 1939.0782 | 4.3065 | 0.7828 | 0.0242 |
| 20108 | 1939.1916 | 3.666  | 0.7817 | 0.0242 |
| 9598  | 1939.2507 | 3.6174 | 0.7805 | 0.0242 |
| 8512  | 1941.3526 | 4.3271 | 0.7814 | 0.0243 |
| 16616 | 1942.1671 | 3.7944 | 0.7809 | 0.0243 |
| 1151  | 1943.258  | 4.3498 | 0.7807 | 0.0243 |
| 19462 | 1945.7387 | 4.3556 | 0.7822 | 0.0244 |
| 7736  | 1945.9844 | 3.8348 | 0.7813 | 0.0244 |
| 3688  | 1949.3282 | 3.6753 | 0.7834 | 0.0245 |
| 19387 | 1949.8011 | 4.1132 | 0.7826 | 0.0245 |
| 17888 | 1951.6116 | 3.4175 | 0.7832 | 0.0246 |

|       |           |        |        |        |
|-------|-----------|--------|--------|--------|
| 15965 | 1953.2083 | 3.574  | 0.7834 | 0.0246 |
| 20455 | 1955.3386 | 4.2054 | 0.7841 | 0.0247 |
| 12634 | 1955.5767 | 3.9051 | 0.7832 | 0.0247 |
| 4114  | 1955.677  | 3.5473 | 0.7821 | 0.0247 |
| 12444 | 1956.091  | 3.8664 | 0.7814 | 0.0247 |
| 12180 | 1956.6996 | 3.6422 | 0.7807 | 0.0247 |
| 17802 | 1956.8235 | 2.2443 | 0.7797 | 0.0247 |
| 13258 | 1957.4877 | 3.68   | 0.7792 | 0.0248 |
| 1887  | 1960.3916 | 4.2813 | 0.7802 | 0.0248 |
| 18168 | 1962.911  | 2.2826 | 0.7813 | 0.0249 |
| 13820 | 1963.0596 | 3.5101 | 0.7803 | 0.0249 |
| 17825 | 1964.4729 | 3.6734 | 0.7806 | 0.025  |
| 15692 | 1964.554  | 4.0461 | 0.7794 | 0.025  |
| 16600 | 1965.8458 | 2.3964 | 0.7793 | 0.025  |
| 19904 | 1968.485  | 3.7014 | 0.7806 | 0.0251 |
| 2204  | 1969.481  | 1.5087 | 0.7803 | 0.0251 |
| 14963 | 1970.3918 | 3.5267 | 0.78   | 0.0251 |
| 20428 | 1971.4955 | 4.1886 | 0.78   | 0.0252 |
| 16596 | 1973.0209 | 4.0125 | 0.7801 | 0.0252 |
| 7328  | 1973.0851 | 3.4822 | 0.779  | 0.0252 |
| 8487  | 1973.5418 | 3.8002 | 0.7785 | 0.0252 |
| 18314 | 1974.002  | 3.9911 | 0.7777 | 0.0252 |
| 17332 | 1974.2473 | 3.587  | 0.7767 | 0.0252 |
| 2424  | 1974.6613 | 2.7223 | 0.776  | 0.0253 |
| 14977 | 1976.3318 | 3.0169 | 0.7765 | 0.0253 |
| 19201 | 1977.0941 | 2.9605 | 0.776  | 0.0253 |
| 7159  | 1981.6599 | 4.0643 | 0.7791 | 0.0255 |
| 3206  | 1982.6767 | 3.7078 | 0.7788 | 0.0255 |
| 1827  | 1984.9052 | 3.9863 | 0.78   | 0.0256 |
| 6234  | 1990.4474 | 3.5428 | 0.7844 | 0.0258 |
| 14934 | 1991.7534 | 4.0649 | 0.7842 | 0.0258 |
| 7163  | 1992.5539 | 3.6395 | 0.7839 | 0.0258 |
| 15561 | 1993.7792 | 3.554  | 0.7841 | 0.0259 |
| 15161 | 1994.2892 | 3.6608 | 0.7834 | 0.0259 |

|       |           |        |        |        |
|-------|-----------|--------|--------|--------|
| 1675  | 1994.6816 | 2.6365 | 0.7826 | 0.0259 |
| 7044  | 1998.1974 | 3.4715 | 0.7846 | 0.026  |
| 15496 | 1999.1375 | 3.7937 | 0.7843 | 0.026  |
| 11463 | 2001.0083 | 3.5394 | 0.7849 | 0.0261 |
| 19962 | 2003.0357 | 4.1375 | 0.7856 | 0.0261 |
| 11026 | 2003.4198 | 4.2423 | 0.7849 | 0.0262 |
| 2331  | 2003.9693 | 3.3623 | 0.7843 | 0.0262 |
| 17858 | 2005.4489 | 4.0245 | 0.7843 | 0.0262 |
| 9122  | 2005.6518 | 3.4243 | 0.7833 | 0.0262 |
| 15322 | 2008.6525 | 3.4348 | 0.7852 | 0.0263 |
| 13489 | 2009.2724 | 2.887  | 0.7845 | 0.0263 |
| 8172  | 2010.3201 | 3.4194 | 0.7843 | 0.0264 |
| 19895 | 2010.9765 | 4.1319 | 0.7839 | 0.0264 |
| 13113 | 2011.6199 | 4.0696 | 0.7832 | 0.0264 |
| 699   | 2013.4072 | 3.9482 | 0.7839 | 0.0265 |
| 16907 | 2013.8067 | 3.8975 | 0.7832 | 0.0265 |
| 16174 | 2014.3897 | 3.6636 | 0.7826 | 0.0265 |
| 20179 | 2015.9739 | 4.0702 | 0.7831 | 0.0266 |
| 7439  | 2016.2658 | 3.1304 | 0.7822 | 0.0266 |
| 20274 | 2017.0171 | 3.5633 | 0.7817 | 0.0266 |
| 14545 | 2017.2085 | 4.0171 | 0.7808 | 0.0266 |
| 3503  | 2019.0397 | 2.0115 | 0.7814 | 0.0267 |
| 19183 | 2020.0541 | 3.816  | 0.7812 | 0.0267 |
| 15373 | 2020.2365 | 3.5165 | 0.7802 | 0.0267 |
| 3002  | 2021.0438 | 4.0138 | 0.7798 | 0.0267 |
| 4907  | 2021.151  | 1.5871 | 0.7788 | 0.0267 |
| 19457 | 2022.2457 | 3.603  | 0.7787 | 0.0268 |
| 14613 | 2024.0096 | 4.1442 | 0.7792 | 0.0268 |
| 5412  | 2024.8634 | 4.0449 | 0.7788 | 0.0268 |
| 4092  | 2026.7407 | 3.9157 | 0.7794 | 0.0269 |
| 15368 | 2030.729  | 3.6891 | 0.7817 | 0.027  |
| 346   | 2031.2903 | 3.6453 | 0.7812 | 0.027  |
| 15347 | 2031.4257 | 4.0945 | 0.7802 | 0.027  |
| 5434  | 2031.8831 | 2.3816 | 0.7796 | 0.0271 |

|       |           |        |        |        |
|-------|-----------|--------|--------|--------|
| 4911  | 2032.258  | 2.585  | 0.7788 | 0.0271 |
| 5062  | 2033.0795 | 2.7278 | 0.7784 | 0.0271 |
| 4609  | 2035.0858 | 3.898  | 0.779  | 0.0271 |
| 15383 | 2037.2141 | 4.0268 | 0.7797 | 0.0272 |
| 14376 | 2037.2515 | 3.5835 | 0.7787 | 0.0272 |
| 16841 | 2037.3543 | 3.4853 | 0.7777 | 0.0272 |
| 11928 | 2037.956  | 3.6935 | 0.7773 | 0.0272 |
| 19803 | 2039.2362 | 3.9978 | 0.7775 | 0.0273 |
| 18843 | 2039.6703 | 3.6218 | 0.7767 | 0.0273 |
| 7673  | 2039.8465 | 3.6519 | 0.7757 | 0.0273 |
| 19345 | 2040.3048 | 3.6684 | 0.7752 | 0.0273 |
| 18861 | 2042.6756 | 3.3483 | 0.7764 | 0.0274 |
| 8802  | 2043.0436 | 3.5468 | 0.7758 | 0.0274 |
| 20165 | 2045.0502 | 2.9432 | 0.7766 | 0.0275 |
| 3027  | 2045.2874 | 3.2931 | 0.7757 | 0.0275 |
| 17159 | 2045.7476 | 2.4769 | 0.7751 | 0.0275 |
| 15288 | 2051.7791 | 3.5259 | 0.7797 | 0.0277 |
| 3330  | 2052.0219 | 3.8904 | 0.7788 | 0.0277 |
| 14557 | 2052.69   | 3.9059 | 0.7783 | 0.0277 |
| 1917  | 2053.524  | 2.315  | 0.778  | 0.0278 |
| 19215 | 2056.9881 | 2.4808 | 0.7802 | 0.0279 |
| 12754 | 2056.9985 | 2.86   | 0.7792 | 0.0279 |
| 8533  | 2058.2532 | 2.8118 | 0.7793 | 0.0279 |
| 16085 | 2058.5601 | 4.0472 | 0.7784 | 0.0279 |
| 9012  | 2058.7413 | 2.4076 | 0.7776 | 0.0279 |
| 12706 | 2058.7553 | 3.456  | 0.7766 | 0.0279 |
| 4980  | 2059.2389 | 3.495  | 0.7759 | 0.0279 |
| 13513 | 2061.405  | 2.4755 | 0.7767 | 0.028  |
| 20305 | 2061.6654 | 3.891  | 0.7758 | 0.028  |
| 14690 | 2065.1519 | 3.1208 | 0.7778 | 0.0281 |
| 18447 | 2065.4754 | 3.0883 | 0.777  | 0.0281 |
| 14318 | 2066.0826 | 3.5537 | 0.7765 | 0.0282 |
| 16103 | 2066.3302 | 1.8689 | 0.7757 | 0.0282 |
| 17382 | 2067.0849 | 3.7778 | 0.7754 | 0.0282 |

|       |           |        |        |        |
|-------|-----------|--------|--------|--------|
| 15227 | 2068.0286 | 3.2615 | 0.7753 | 0.0282 |
| 7679  | 2069.3239 | 3.6567 | 0.7755 | 0.0283 |
| 15268 | 2069.8774 | 4.015  | 0.7749 | 0.0283 |
| 14470 | 2069.8884 | 3.8443 | 0.7739 | 0.0283 |
| 18677 | 2074.1217 | 3.8236 | 0.7763 | 0.0284 |
| 8164  | 2076.4758 | 3.9522 | 0.7775 | 0.0285 |
| 17597 | 2076.6157 | 3.5163 | 0.7766 | 0.0285 |
| 9145  | 2077.3748 | 3.6819 | 0.7763 | 0.0285 |
| 15589 | 2083.7803 | 2.8506 | 0.7809 | 0.0287 |
| 4841  | 2084.0063 | 2.6809 | 0.7801 | 0.0287 |
| 19809 | 2085.9512 | 3.6925 | 0.7808 | 0.0288 |
| 10853 | 2088.8136 | 3.5461 | 0.7824 | 0.0289 |
| 15772 | 2088.8533 | 3.9928 | 0.7814 | 0.0289 |
| 19356 | 2090.7829 | 3.8886 | 0.7823 | 0.029  |
| 13442 | 2092.9547 | 3.8317 | 0.7833 | 0.0291 |
| 16827 | 2094.912  | 3.4771 | 0.7841 | 0.0291 |
| 18634 | 2095.8231 | 3.9736 | 0.7838 | 0.0292 |
| 4662  | 2096.3108 | 1.7948 | 0.7834 | 0.0292 |
| 5622  | 2096.3195 | 3.2684 | 0.7824 | 0.0292 |
| 15468 | 2098.2167 | 3.9804 | 0.783  | 0.0292 |
| 313   | 2098.806  | 1.9077 | 0.7824 | 0.0293 |
| 18600 | 2098.9101 | 3.4462 | 0.7815 | 0.0293 |
| 15055 | 2099.2044 | 3.8643 | 0.7808 | 0.0293 |
| 13917 | 2100.294  | 3.7133 | 0.7807 | 0.0293 |
| 14506 | 2100.8838 | 3.8069 | 0.7801 | 0.0293 |
| 18187 | 2101.1611 | 3.821  | 0.7793 | 0.0293 |
| 18692 | 2105.0555 | 3.3109 | 0.7819 | 0.0295 |
| 6567  | 2106.604  | 3.3061 | 0.7823 | 0.0295 |
| 18491 | 2110.9646 | 2.1922 | 0.7853 | 0.0297 |
| 18040 | 2112.1745 | 3.8584 | 0.7856 | 0.0297 |
| 9210  | 2113.138  | 3.9284 | 0.7854 | 0.0297 |
| 14605 | 2115.3267 | 3.4113 | 0.7862 | 0.0298 |
| 19281 | 2117.6015 | 3.7752 | 0.7872 | 0.0299 |
| 18130 | 2117.9167 | 2.478  | 0.7866 | 0.0299 |

|       |           |        |        |        |
|-------|-----------|--------|--------|--------|
| 5786  | 2118.5093 | 3.5943 | 0.7861 | 0.0299 |
| 9681  | 2118.8851 | 1.428  | 0.7855 | 0.0299 |
| 15962 | 2119.1029 | 3.6098 | 0.7847 | 0.03   |
| 14319 | 2119.3258 | 3.9154 | 0.7839 | 0.03   |
| 18814 | 2120.7326 | 3.817  | 0.7842 | 0.03   |
| 10104 | 2123.58   | 2.5259 | 0.7855 | 0.0301 |
| 11133 | 2124.4287 | 3.901  | 0.7853 | 0.0301 |
| 18033 | 2124.6178 | 4.0721 | 0.7846 | 0.0301 |
| 12105 | 2125.1931 | 3.7261 | 0.784  | 0.0302 |
| 9842  | 2125.9861 | 3.7974 | 0.7839 | 0.0302 |
| 4842  | 2126.1704 | 0.934  | 0.783  | 0.0302 |
| 15934 | 2129.1869 | 3.0524 | 0.7847 | 0.0303 |
| 15599 | 2129.7833 | 2.9903 | 0.7843 | 0.0303 |
| 16653 | 2132.0632 | 1.9384 | 0.7855 | 0.0304 |
| 14244 | 2132.2983 | 1.7991 | 0.7847 | 0.0304 |
| 7688  | 2133.6961 | 2.3582 | 0.7849 | 0.0305 |
| 8332  | 2134.1348 | 1.5893 | 0.7844 | 0.0305 |
| 18501 | 2135.138  | 3.194  | 0.7841 | 0.0305 |
| 4924  | 2135.5957 | 3.9584 | 0.7836 | 0.0305 |
| 9140  | 2136.4253 | 4.1114 | 0.7835 | 0.0306 |
| 20004 | 2136.9969 | 3.5312 | 0.783  | 0.0306 |
| 16268 | 2138.6267 | 3.4925 | 0.7835 | 0.0306 |
| 15300 | 2138.977  | 3.6059 | 0.7829 | 0.0306 |
| 19461 | 2140.0291 | 3.9078 | 0.783  | 0.0307 |
| 2438  | 2142.7311 | 2.6907 | 0.7842 | 0.0308 |
| 11970 | 2144.5092 | 2.7535 | 0.7849 | 0.0308 |
| 5414  | 2144.5417 | 3.9598 | 0.7839 | 0.0308 |
| 14440 | 2151.9653 | 2.6331 | 0.7892 | 0.0311 |
| 9758  | 2152.3358 | 3.0948 | 0.7886 | 0.0311 |
| 8146  | 2153.6351 | 3.8842 | 0.7887 | 0.0311 |
| 20425 | 2153.689  | 3.369  | 0.7877 | 0.0311 |
| 18224 | 2154.6574 | 3.5426 | 0.788  | 0.0312 |
| 11634 | 2154.7116 | 3.8562 | 0.787  | 0.0312 |
| 17778 | 2155.1895 | 3.5467 | 0.7864 | 0.0312 |

|       |           |        |        |        |
|-------|-----------|--------|--------|--------|
| 10968 | 2156.7097 | 3.8927 | 0.7869 | 0.0313 |
| 8478  | 2158.7485 | 3.5528 | 0.7877 | 0.0313 |
| 14626 | 2164.7619 | 3.7218 | 0.7921 | 0.0316 |
| 3389  | 2166.0628 | 3.5839 | 0.7923 | 0.0316 |
| 5543  | 2167.6587 | 3.6423 | 0.7927 | 0.0317 |
| 4242  | 2167.9652 | 3.2234 | 0.7919 | 0.0317 |
| 2408  | 2168.7373 | 2.4638 | 0.7916 | 0.0317 |
| 19260 | 2168.9349 | 3.4921 | 0.7909 | 0.0317 |
| 9971  | 2169.9902 | 3.7586 | 0.791  | 0.0317 |
| 16853 | 2171.6037 | 3.8402 | 0.7914 | 0.0318 |
| 10010 | 2172.0857 | 3.9041 | 0.7909 | 0.0318 |
| 4261  | 2175.5826 | 4.0123 | 0.7931 | 0.0319 |
| 7341  | 2176.3043 | 3.5324 | 0.7927 | 0.032  |
| 4339  | 2179.1787 | 3.7976 | 0.7943 | 0.0321 |
| 14535 | 2179.7928 | 2.3555 | 0.794  | 0.0321 |
| 5888  | 2181.2838 | 3.3143 | 0.7941 | 0.0321 |
| 19299 | 2185.0747 | 3.767  | 0.7963 | 0.0323 |
| 886   | 2185.3616 | 3.9537 | 0.7956 | 0.0323 |
| 17291 | 2185.9999 | 2.4666 | 0.7952 | 0.0323 |
| 5640  | 2187.6501 | 3.8285 | 0.7956 | 0.0324 |
| 19845 | 2190.9956 | 3.7273 | 0.7975 | 0.0325 |
| 2714  | 2193.1338 | 3.6869 | 0.7985 | 0.0325 |
| 9538  | 2193.655  | 3.017  | 0.7979 | 0.0326 |
| 15813 | 2195.3605 | 1.9366 | 0.7984 | 0.0326 |
| 8774  | 2198.1062 | 3.4021 | 0.7998 | 0.0327 |
| 7436  | 2199.2745 | 2.3549 | 0.7998 | 0.0328 |
| 343   | 2200.3011 | 3.1105 | 0.7998 | 0.0328 |
| 2499  | 2200.3022 | 2.5607 | 0.7988 | 0.0328 |
| 6146  | 2200.5542 | 3.6585 | 0.798  | 0.0328 |
| 4167  | 2201.2888 | 3.399  | 0.7979 | 0.0328 |
| 13639 | 2202.0966 | 3.1774 | 0.7976 | 0.0329 |
| 15320 | 2203.3995 | 3.7875 | 0.7979 | 0.0329 |
| 15590 | 2204.5106 | 3.7545 | 0.798  | 0.033  |
| 14058 | 2205.366  | 2.4322 | 0.7979 | 0.033  |



|       |           |        |        |        |
|-------|-----------|--------|--------|--------|
| 6104  | 2205.8284 | 3.7936 | 0.7973 | 0.033  |
| 8889  | 2206.4061 | 2.3302 | 0.7969 | 0.033  |
| 1314  | 2211.3004 | 3.7848 | 0.8004 | 0.0332 |
| 11805 | 2211.3395 | 2.556  | 0.7995 | 0.0332 |
| 19394 | 2211.5692 | 3.2289 | 0.7988 | 0.0332 |
| 14684 | 2213.3631 | 2.6197 | 0.7993 | 0.0333 |
| 2249  | 2216.3716 | 3.112  | 0.8009 | 0.0334 |
| 15037 | 2216.445  | 2.9528 | 0.8    | 0.0334 |
| 3812  | 2218.1485 | 3.7697 | 0.8005 | 0.0335 |
| 10852 | 2218.7254 | 3.6903 | 0.8002 | 0.0335 |
| 8548  | 2220.0837 | 2.0642 | 0.8004 | 0.0335 |
| 5657  | 2223.4623 | 3.1781 | 0.802  | 0.0336 |
| 19019 | 2223.8091 | 3.7163 | 0.8013 | 0.0336 |
| 3552  | 2224.6487 | 3.4833 | 0.801  | 0.0337 |
| 7844  | 2226.1986 | 2.8261 | 0.8014 | 0.0337 |
| 1745  | 2228.9343 | 3.7153 | 0.8027 | 0.0338 |
| 5146  | 2229.1508 | 2.6939 | 0.8019 | 0.0338 |
| 17213 | 2230.3865 | 3.0859 | 0.8022 | 0.0339 |
| 18239 | 2232.4285 | 3.8394 | 0.8031 | 0.034  |
| 15485 | 2232.7365 | 3.6084 | 0.8024 | 0.034  |
| 19406 | 2233.0478 | 3.6775 | 0.8018 | 0.034  |
| 11456 | 2234.2491 | 3.5609 | 0.8021 | 0.034  |
| 15814 | 2234.7862 | 2.9502 | 0.8016 | 0.034  |
| 13232 | 2235.7248 | 3.6926 | 0.8015 | 0.0341 |
| 4363  | 2237.865  | 3.5122 | 0.8024 | 0.0342 |
| 14386 | 2239.1387 | 2.6347 | 0.8027 | 0.0342 |
| 20336 | 2239.6315 | 3.4552 | 0.8021 | 0.0342 |
| 7670  | 2239.8044 | 3.607  | 0.8014 | 0.0342 |
| 11484 | 2240.8672 | 3.7589 | 0.8013 | 0.0343 |
| 4765  | 2242.9298 | 2.3819 | 0.802  | 0.0343 |
| 9504  | 2243.4493 | 3.6946 | 0.8015 | 0.0344 |
| 16856 | 2243.896  | 2.6308 | 0.8009 | 0.0344 |
| 16243 | 2244.5144 | 3.0292 | 0.8005 | 0.0344 |
| 13819 | 2247.8758 | 3.346  | 0.8024 | 0.0345 |

|       |           |        |        |        |
|-------|-----------|--------|--------|--------|
| 17595 | 2248.5413 | 2.7918 | 0.8022 | 0.0345 |
| 5091  | 2248.8579 | 3.1157 | 0.8015 | 0.0346 |
| 4183  | 2249.8839 | 3.9344 | 0.8014 | 0.0346 |
| 4107  | 2252.5122 | 3.5823 | 0.8027 | 0.0347 |
| 15457 | 2252.7498 | 3.7463 | 0.8019 | 0.0347 |
| 14949 | 2255.7156 | 2.9026 | 0.8034 | 0.0348 |
| 347   | 2261.1015 | 3.127  | 0.8067 | 0.035  |
| 10607 | 2261.7382 | 3.7198 | 0.8064 | 0.035  |
| 5166  | 2261.7409 | 3.3142 | 0.8055 | 0.035  |
| 1692  | 2263.6835 | 2.6451 | 0.806  | 0.0351 |
| 2744  | 2264.4031 | 3.225  | 0.8057 | 0.0351 |
| 6719  | 2265.2491 | 3.2878 | 0.8056 | 0.0351 |
| 2798  | 2269.2137 | 2.0343 | 0.808  | 0.0353 |
| 16119 | 2269.514  | 3.7535 | 0.8074 | 0.0353 |
| 14246 | 2273.0465 | 3.7265 | 0.8091 | 0.0354 |
| 4382  | 2273.1527 | 3.5003 | 0.8083 | 0.0354 |
| 13438 | 2276.0855 | 3.1438 | 0.8098 | 0.0355 |
| 18268 | 2276.256  | 3.5959 | 0.8091 | 0.0355 |
| 4254  | 2276.6952 | 2.8522 | 0.8086 | 0.0355 |
| 12157 | 2277.0178 | 3.7271 | 0.8078 | 0.0355 |
| 465   | 2277.9187 | 3.6639 | 0.8077 | 0.0356 |
| 10017 | 2278.6096 | 1.9414 | 0.8073 | 0.0356 |
| 14472 | 2282.5052 | 2.9806 | 0.8096 | 0.0357 |
| 14572 | 2282.9609 | 3.6738 | 0.809  | 0.0357 |
| 15603 | 2285.1299 | 3.6719 | 0.8099 | 0.0358 |
| 10863 | 2285.2327 | 2.9318 | 0.8091 | 0.0358 |
| 7870  | 2289.684  | 3.5897 | 0.8121 | 0.036  |
| 11398 | 2290.0286 | 3.487  | 0.8115 | 0.036  |
| 14062 | 2295.5278 | 2.7758 | 0.815  | 0.0362 |
| 18441 | 2296.7703 | 3.4555 | 0.8151 | 0.0363 |
| 17808 | 2297.3628 | 3.3843 | 0.8147 | 0.0363 |
| 18415 | 2304.3055 | 3.5312 | 0.8198 | 0.0365 |
| 4458  | 2305.0456 | 3.2853 | 0.8196 | 0.0366 |
| 18170 | 2305.2868 | 2.9809 | 0.8189 | 0.0366 |

|       |           |        |        |        |
|-------|-----------|--------|--------|--------|
| 19714 | 2308.2138 | 0.4724 | 0.8206 | 0.0367 |
| 5040  | 2309.7853 | 3.205  | 0.821  | 0.0368 |
| 3308  | 2310.8879 | 2.9806 | 0.821  | 0.0368 |
| 16904 | 2311.0849 | 3.509  | 0.8202 | 0.0368 |
| 4596  | 2311.9969 | 2.674  | 0.82   | 0.0368 |
| 5346  | 2312.3572 | 3.5999 | 0.8193 | 0.0368 |
| 14196 | 2312.643  | 3.6795 | 0.8186 | 0.0368 |
| 15633 | 2313.1895 | 2.8589 | 0.818  | 0.0369 |
| 20309 | 2315.2427 | 3.275  | 0.8189 | 0.0369 |
| 4851  | 2315.4046 | 3.7676 | 0.8181 | 0.0369 |
| 15839 | 2315.8778 | 3.4017 | 0.8176 | 0.037  |
| 12396 | 2316.6029 | 2.5464 | 0.8173 | 0.037  |
| 8785  | 2316.9411 | 2.4908 | 0.8167 | 0.037  |
| 11731 | 2318.7917 | 3.4187 | 0.8176 | 0.0371 |
| 17692 | 2320.4646 | 3.5648 | 0.8181 | 0.0371 |
| 8490  | 2321.5001 | 3.4572 | 0.8178 | 0.0372 |
| 17253 | 2322.661  | 2.9946 | 0.818  | 0.0372 |
| 15230 | 2323.3198 | 3.6992 | 0.8177 | 0.0372 |
| 8157  | 2324.4583 | 1.0685 | 0.8178 | 0.0373 |
| 15436 | 2324.6383 | 2.2877 | 0.8171 | 0.0373 |
| 2337  | 2326.3757 | 3.4978 | 0.8177 | 0.0374 |
| 12916 | 2326.3855 | 2.827  | 0.8168 | 0.0374 |
| 17399 | 2327.468  | 2.7568 | 0.8168 | 0.0374 |
| 6012  | 2334.3734 | 3.5775 | 0.8215 | 0.0377 |
| 3734  | 2337.7655 | 3.2066 | 0.8232 | 0.0378 |
| 16667 | 2339.2648 | 3.4616 | 0.8237 | 0.0378 |
| 6123  | 2339.3138 | 3.7063 | 0.8229 | 0.0378 |
| 7008  | 2340.1898 | 3.7013 | 0.8227 | 0.0379 |
| 18123 | 2340.3397 | 3.3495 | 0.822  | 0.0379 |
| 1447  | 2341.1932 | 3.2017 | 0.8218 | 0.0379 |
| 15099 | 2341.6123 | 3.4197 | 0.8213 | 0.0379 |
| 3795  | 2342.1127 | 3.6033 | 0.8209 | 0.038  |
| 7505  | 2342.6272 | 3.4152 | 0.8203 | 0.038  |
| 8833  | 2344.1382 | 3.0733 | 0.8205 | 0.038  |

|       |           |        |        |        |
|-------|-----------|--------|--------|--------|
| 17901 | 2344.3493 | 2.9106 | 0.8199 | 0.038  |
| 12974 | 2346.076  | 3.0847 | 0.8204 | 0.0381 |
| 357   | 2348.0205 | 3.5303 | 0.8212 | 0.0382 |
| 9656  | 2350.7654 | 3.5518 | 0.8225 | 0.0383 |
| 17529 | 2351.7889 | 3.3708 | 0.8224 | 0.0383 |
| 17193 | 2353.7788 | 3.6478 | 0.8234 | 0.0384 |
| 16003 | 2354.2862 | 3.3371 | 0.823  | 0.0384 |
| 7258  | 2356.8295 | 3.5306 | 0.8245 | 0.0385 |
| 11264 | 2356.9045 | 3.633  | 0.8237 | 0.0385 |
| 18095 | 2358.7775 | 3.3545 | 0.8244 | 0.0386 |
| 4706  | 2360.8103 | 3.1644 | 0.8253 | 0.0387 |
| 7266  | 2361.0123 | 3.3502 | 0.8246 | 0.0387 |
| 13030 | 2362.9957 | 3.5788 | 0.8254 | 0.0388 |
| 9970  | 2363.5364 | 3.3932 | 0.825  | 0.0388 |
| 18021 | 2363.9081 | 3.448  | 0.8244 | 0.0388 |
| 8362  | 2367.7132 | 3.5318 | 0.8267 | 0.039  |
| 1914  | 2368.4696 | 3.4487 | 0.8267 | 0.039  |
| 16943 | 2369.0091 | 3.2467 | 0.8262 | 0.039  |
| 9468  | 2369.1432 | 0.4237 | 0.8255 | 0.039  |
| 11381 | 2369.6692 | 3.3274 | 0.8252 | 0.039  |
| 19890 | 2375.2426 | 3.4439 | 0.8289 | 0.0393 |
| 3298  | 2379.1522 | 3.066  | 0.8311 | 0.0394 |
| 19988 | 2380.2887 | 3.3026 | 0.8312 | 0.0394 |
| 1721  | 2380.5272 | 1.9201 | 0.8305 | 0.0395 |
| 14259 | 2380.6463 | 1.9817 | 0.8298 | 0.0395 |
| 9910  | 2380.9001 | 3.4775 | 0.8292 | 0.0395 |
| 3780  | 2381.6894 | 3.1946 | 0.829  | 0.0395 |
| 7874  | 2382.0616 | 3.4644 | 0.8285 | 0.0395 |
| 11474 | 2383.2808 | 3.3121 | 0.8287 | 0.0396 |
| 7468  | 2385.0165 | 2.5106 | 0.8294 | 0.0396 |
| 4411  | 2388.4883 | 3.5961 | 0.8313 | 0.0398 |
| 2818  | 2390.4266 | 3.4326 | 0.8321 | 0.0399 |
| 3731  | 2390.4897 | 3.617  | 0.8313 | 0.0399 |
| 11397 | 2390.7212 | 3.6373 | 0.8306 | 0.0399 |

|       |           |        |        |        |
|-------|-----------|--------|--------|--------|
| 18012 | 2391.1397 | 3.4207 | 0.8302 | 0.0399 |
| 18553 | 2391.4167 | 3.5838 | 0.8296 | 0.0399 |
| 11220 | 2393.3401 | 3.4202 | 0.8304 | 0.04   |
| 10383 | 2393.8348 | 3.4786 | 0.83   | 0.04   |
| 11641 | 2394.0274 | 1.4923 | 0.8294 | 0.04   |
| 18211 | 2395.2349 | 3.1622 | 0.8294 | 0.0401 |
| 8488  | 2395.3159 | 2.9099 | 0.8287 | 0.0401 |
| 10965 | 2397.1937 | 3.1395 | 0.8292 | 0.0401 |
| 16047 | 2399.9881 | 2.5302 | 0.8304 | 0.0402 |
| 10421 | 2400.8744 | 1.8312 | 0.8303 | 0.0403 |
| 18047 | 2400.9193 | 1.4088 | 0.8295 | 0.0403 |
| 18276 | 2401.5784 | 3.6413 | 0.8291 | 0.0403 |
| 14853 | 2402.3    | 3.0188 | 0.8289 | 0.0403 |
| 18661 | 2408.5808 | 3.3863 | 0.833  | 0.0406 |
| 18265 | 2409.2115 | 2.1933 | 0.8327 | 0.0406 |
| 10245 | 2409.5726 | 3.3975 | 0.8321 | 0.0406 |
| 14248 | 2413.7954 | 3.1489 | 0.8345 | 0.0407 |
| 4345  | 2417.1941 | 3.0638 | 0.8367 | 0.0409 |
| 16677 | 2417.7866 | 2.7286 | 0.8365 | 0.0409 |
| 12095 | 2418.5096 | 3.2866 | 0.8362 | 0.041  |
| 14079 | 2420.1142 | 3.0387 | 0.8367 | 0.041  |
| 7124  | 2420.9852 | 3.3586 | 0.8365 | 0.0411 |
| 15563 | 2421.2848 | 2.7572 | 0.8359 | 0.0411 |
| 16573 | 2421.4838 | 3.3741 | 0.8352 | 0.0411 |
| 19476 | 2421.586  | 2.4378 | 0.8345 | 0.0411 |
| 3035  | 2423.4962 | 3.2292 | 0.8352 | 0.0411 |
| 11100 | 2424.7457 | 2.8979 | 0.8354 | 0.0412 |
| 18056 | 2426.6987 | 3.5763 | 0.8363 | 0.0413 |
| 9792  | 2428.6996 | 2.8169 | 0.8373 | 0.0414 |
| 16514 | 2429.3855 | 3.3658 | 0.837  | 0.0414 |
| 16934 | 2430.3206 | 3.3187 | 0.837  | 0.0414 |
| 9165  | 2431.0024 | 2.6804 | 0.8368 | 0.0415 |
| 13865 | 2432.0048 | 3.363  | 0.8369 | 0.0415 |
| 14274 | 2432.5589 | 3.3885 | 0.8365 | 0.0415 |

|       |           |        |        |        |
|-------|-----------|--------|--------|--------|
| 10395 | 2435.146  | 3.2659 | 0.838  | 0.0417 |
| 16481 | 2435.1543 | 3.2311 | 0.8372 | 0.0417 |
| 1319  | 2438.1409 | 3.5234 | 0.8388 | 0.0418 |
| 1216  | 2441.6575 | 3.2537 | 0.8407 | 0.0419 |
| 18766 | 2442.2107 | 2.7375 | 0.8403 | 0.0419 |
| 17026 | 2442.8353 | 3.684  | 0.84   | 0.042  |
| 4361  | 2443.1702 | 3.2007 | 0.8395 | 0.042  |
| 8289  | 2443.2421 | 2.7681 | 0.8387 | 0.042  |
| 17558 | 2444.0749 | 3.1097 | 0.8384 | 0.042  |
| 18806 | 2444.2915 | 3.5914 | 0.8378 | 0.042  |
| 15188 | 2445.2073 | 3.4402 | 0.8377 | 0.042  |
| 5114  | 2445.2195 | 3.3156 | 0.8369 | 0.042  |
| 19075 | 2446.1687 | 3.5613 | 0.8369 | 0.0421 |
| 3060  | 2446.7247 | 2.7798 | 0.8366 | 0.0421 |
| 10989 | 2446.7679 | 3.4815 | 0.8358 | 0.0421 |
| 5071  | 2447.4237 | 2.852  | 0.8356 | 0.0421 |
| 18366 | 2450.0177 | 2.9219 | 0.837  | 0.0423 |
| 15562 | 2452.3589 | 3.551  | 0.838  | 0.0424 |
| 20254 | 2452.7315 | 3.2309 | 0.8375 | 0.0424 |
| 10361 | 2453.8741 | 2.4976 | 0.8378 | 0.0424 |
| 11401 | 2456.8013 | 3.3173 | 0.8393 | 0.0425 |
| 5760  | 2457.2105 | 2.8599 | 0.8387 | 0.0426 |
| 18813 | 2462.5288 | 2.4534 | 0.8422 | 0.0428 |
| 18601 | 2463.4609 | 3.3476 | 0.8421 | 0.0428 |
| 9184  | 2465.2414 | 2.603  | 0.8429 | 0.0429 |
| 1843  | 2465.4248 | 3.3985 | 0.8422 | 0.0429 |
| 15888 | 2467.099  | 3.3523 | 0.843  | 0.043  |
| 20372 | 2468.4328 | 2.2302 | 0.8431 | 0.043  |
| 2750  | 2469.9868 | 3.4072 | 0.8435 | 0.0431 |
| 10712 | 2470.5064 | 3.4092 | 0.843  | 0.0431 |
| 10836 | 2473.0526 | 3.2062 | 0.8441 | 0.0432 |
| 19081 | 2473.4604 | 2.8428 | 0.8436 | 0.0432 |
| 19444 | 2473.6544 | 2.333  | 0.843  | 0.0432 |
| 15181 | 2479.981  | 3.2857 | 0.8473 | 0.0435 |

|       |           |        |        |        |
|-------|-----------|--------|--------|--------|
| 1655  | 2481.9794 | 2.5406 | 0.8481 | 0.0436 |
| 17633 | 2483.4584 | 3.3885 | 0.8485 | 0.0436 |
| 18506 | 2483.6443 | 1.3541 | 0.8478 | 0.0436 |
| 2703  | 2483.9415 | 2.7827 | 0.8473 | 0.0437 |
| 4154  | 2488.8862 | 3.427  | 0.8502 | 0.0438 |
| 4959  | 2489.1591 | 3.2517 | 0.8496 | 0.0438 |
| 8656  | 2490.1822 | 3.3842 | 0.8497 | 0.0439 |
| 16445 | 2491.8493 | 3.2498 | 0.8502 | 0.044  |
| 15332 | 2491.8885 | 3.3126 | 0.8494 | 0.044  |
| 17215 | 2492.0863 | 2.8805 | 0.8487 | 0.044  |
| 11143 | 2495.2078 | 3.1085 | 0.8502 | 0.0441 |
| 1336  | 2496.6573 | 2.7112 | 0.8507 | 0.0442 |
| 4150  | 2497.3106 | 3.0184 | 0.8504 | 0.0442 |
| 18039 | 2497.3303 | 3.0309 | 0.8497 | 0.0442 |
| 17431 | 2499.3619 | 3.3041 | 0.8505 | 0.0443 |
| 14645 | 2499.6965 | 3.1549 | 0.85   | 0.0443 |
| 18493 | 2500.4268 | 3.4542 | 0.8497 | 0.0443 |
| 17732 | 2501.3764 | 3.1533 | 0.8497 | 0.0444 |
| 14093 | 2504.3006 | 3.2032 | 0.8512 | 0.0445 |
| 19438 | 2506.0167 | 2.6361 | 0.8518 | 0.0445 |
| 2650  | 2506.3939 | 2.3239 | 0.8513 | 0.0446 |
| 13719 | 2507.3163 | 3.098  | 0.8512 | 0.0446 |
| 15583 | 2510.3126 | 3.4183 | 0.8528 | 0.0447 |
| 11924 | 2511.3035 | 3.2942 | 0.8528 | 0.0448 |
| 15198 | 2511.5527 | 3.263  | 0.8522 | 0.0448 |
| 12086 | 2512.1252 | 3.1311 | 0.8519 | 0.0448 |
| 11618 | 2513.3367 | 1.952  | 0.8519 | 0.0448 |
| 3768  | 2513.9202 | 2.5227 | 0.8515 | 0.0449 |
| 2533  | 2513.9801 | 1.9917 | 0.8508 | 0.0449 |
| 20150 | 2514.7361 | 3.3295 | 0.8507 | 0.0449 |
| 14562 | 2516.1341 | 2.9322 | 0.851  | 0.045  |
| 5035  | 2516.7389 | 3.1546 | 0.8508 | 0.045  |
| 15247 | 2519.143  | 3.3556 | 0.8519 | 0.0451 |
| 11461 | 2520.5707 | 3.011  | 0.8524 | 0.0452 |

|       |           |        |        |        |
|-------|-----------|--------|--------|--------|
| 14084 | 2524.6703 | 3.4303 | 0.8549 | 0.0453 |
| 6890  | 2524.8967 | 1.9153 | 0.8543 | 0.0453 |
| 15278 | 2525.4588 | 2.6622 | 0.8538 | 0.0454 |
| 13506 | 2525.6957 | 2.7471 | 0.8532 | 0.0454 |
| 3639  | 2526.7674 | 3.3202 | 0.8533 | 0.0454 |
| 14598 | 2530.0455 | 3.3789 | 0.8549 | 0.0455 |
| 11722 | 2530.5296 | 2.4771 | 0.8544 | 0.0456 |
| 15615 | 2532.4085 | 3.1247 | 0.8552 | 0.0456 |
| 11126 | 2532.6307 | 2.6687 | 0.8546 | 0.0457 |
| 15319 | 2533.187  | 3.4487 | 0.8542 | 0.0457 |
| 12415 | 2533.3745 | 2.2095 | 0.8536 | 0.0457 |
| 9859  | 2534.2835 | 2.9029 | 0.8536 | 0.0457 |
| 17663 | 2537.0771 | 3.0757 | 0.8551 | 0.0458 |
| 8545  | 2537.9558 | 3.0242 | 0.8548 | 0.0459 |
| 14381 | 2539.0541 | 2.6257 | 0.855  | 0.0459 |
| 17793 | 2540.5099 | 2.7868 | 0.8553 | 0.046  |
| 15578 | 2541.2732 | 2.9939 | 0.8551 | 0.046  |
| 4432  | 2542.0213 | 2.9024 | 0.8549 | 0.046  |
| 20341 | 2542.7883 | 3.3433 | 0.8547 | 0.0461 |
| 15778 | 2545.3165 | 3.1642 | 0.8561 | 0.0462 |
| 7322  | 2545.6569 | 3.4829 | 0.8556 | 0.0462 |
| 214   | 2546.0617 | 3.1473 | 0.8551 | 0.0462 |
| 15163 | 2547.6122 | 3.246  | 0.8555 | 0.0463 |
| 2929  | 2549.4281 | 2.8942 | 0.8561 | 0.0464 |
| 4715  | 2553.0567 | 3.4342 | 0.8582 | 0.0465 |
| 5551  | 2553.4518 | 2.7522 | 0.8577 | 0.0465 |
| 18583 | 2556.662  | 2.9691 | 0.8593 | 0.0467 |
| 14288 | 2558.8422 | 3.0238 | 0.8602 | 0.0467 |
| 14411 | 2558.9954 | 3.3695 | 0.8595 | 0.0468 |
| 8351  | 2559.0276 | 1.9281 | 0.8588 | 0.0468 |
| 1976  | 2559.9905 | 2.1421 | 0.8588 | 0.0468 |
| 13141 | 2560.7276 | 2.3762 | 0.8586 | 0.0468 |
| 8707  | 2562.7061 | 3.2367 | 0.8593 | 0.0469 |
| 14845 | 2562.7431 | 3.1543 | 0.8585 | 0.0469 |



|       |           |        |        |        |
|-------|-----------|--------|--------|--------|
| 17873 | 2563.1447 | 3.1577 | 0.8581 | 0.0469 |
| 4048  | 2564.0428 | 2.8303 | 0.8581 | 0.047  |
| 18370 | 2564.4465 | 3.2667 | 0.8576 | 0.047  |
| 11062 | 2565.9099 | 2.8922 | 0.858  | 0.0471 |
| 15354 | 2566.4268 | 2.1387 | 0.8578 | 0.0471 |
| 6410  | 2566.5754 | 2.7359 | 0.8572 | 0.0471 |
| 10343 | 2567.8328 | 3.0444 | 0.8573 | 0.0471 |
| 17679 | 2568.9264 | 2.8992 | 0.8574 | 0.0472 |
| 1568  | 2568.9501 | 2.2874 | 0.8566 | 0.0472 |
| 11328 | 2569.3591 | 3.2257 | 0.8562 | 0.0472 |
| 5632  | 2571.4547 | 3.4015 | 0.8568 | 0.0473 |
| 14705 | 2571.5915 | 2.6883 | 0.8562 | 0.0473 |
| 4902  | 2571.6006 | 2.7921 | 0.8554 | 0.0473 |
| 3536  | 2573.8933 | 3.0581 | 0.8565 | 0.0474 |
| 4574  | 2574.253  | 2.4452 | 0.8561 | 0.0474 |
| 4076  | 2574.8554 | 3.2713 | 0.8556 | 0.0474 |
| 6883  | 2575.2225 | 0.9941 | 0.8551 | 0.0474 |
| 5454  | 2575.2894 | 3.0942 | 0.8544 | 0.0474 |
| 1492  | 2575.4372 | 3.233  | 0.8538 | 0.0474 |
| 11376 | 2575.7214 | 3.1658 | 0.8532 | 0.0475 |
| 16371 | 2576.7859 | 2.4194 | 0.8533 | 0.0475 |
| 17318 | 2578.7604 | 2.885  | 0.8541 | 0.0476 |
| 10544 | 2579.0433 | 3.1812 | 0.8536 | 0.0476 |
| 2543  | 2579.2103 | 2.5007 | 0.8529 | 0.0476 |
| 9640  | 2580.5329 | 2.1748 | 0.8531 | 0.0477 |
| 20132 | 2584.1448 | 3.1195 | 0.855  | 0.0478 |
| 4866  | 2584.2169 | 3.0949 | 0.8543 | 0.0478 |
| 3566  | 2585.5478 | 3.267  | 0.8545 | 0.0479 |
| 6535  | 2585.5722 | 3.1988 | 0.8538 | 0.0479 |
| 16153 | 2587.2982 | 2.6945 | 0.8545 | 0.0479 |
| 9429  | 2590.2444 | 1.135  | 0.8559 | 0.0481 |
| 8640  | 2594.1045 | 3.097  | 0.858  | 0.0482 |
| 8783  | 2594.8357 | 3.1378 | 0.8579 | 0.0483 |
| 20324 | 2596.3234 | 3.309  | 0.8583 | 0.0483 |

|       |           |        |        |        |
|-------|-----------|--------|--------|--------|
| 10947 | 2596.8698 | 2.6657 | 0.8579 | 0.0483 |
| 3480  | 2597.054  | 3.2038 | 0.8573 | 0.0484 |
| 6926  | 2600.8973 | 3.0531 | 0.8595 | 0.0485 |
| 8845  | 2600.9685 | 2.8253 | 0.8588 | 0.0485 |
| 2177  | 2601.0525 | 1.1674 | 0.8582 | 0.0485 |
| 4993  | 2604.3576 | 3.1586 | 0.8598 | 0.0487 |
| 18762 | 2607.5497 | 3.0392 | 0.8614 | 0.0488 |
| 10344 | 2610.6802 | 1.6808 | 0.8632 | 0.0489 |
| 2685  | 2613.7204 | 3.0926 | 0.8646 | 0.0491 |
| 7958  | 2613.7596 | 2.8069 | 0.8639 | 0.0491 |
| 14292 | 2614.503  | 3.1067 | 0.8637 | 0.0491 |
| 15478 | 2614.6943 | 3.1056 | 0.8632 | 0.0491 |
| 3900  | 2620.0359 | 3.0986 | 0.8663 | 0.0493 |
| 13713 | 2620.1563 | 3.0679 | 0.8657 | 0.0493 |
| 11396 | 2621.8432 | 2.9782 | 0.8663 | 0.0494 |
| 20423 | 2622.384  | 2.9145 | 0.8659 | 0.0494 |
| 4905  | 2622.4725 | 3.1869 | 0.8652 | 0.0494 |
| 19869 | 2622.9798 | 1.6596 | 0.8648 | 0.0495 |
| 11507 | 2624.2547 | 3.0852 | 0.865  | 0.0495 |
| 2006  | 2624.9061 | 3.161  | 0.8647 | 0.0495 |
| 13980 | 2627.7453 | 2.8416 | 0.8661 | 0.0497 |
| 19812 | 2629.3217 | 2.9372 | 0.8665 | 0.0497 |
| 20221 | 2629.3358 | 2.8201 | 0.8657 | 0.0497 |
| 2834  | 2631.1298 | 2.4672 | 0.8666 | 0.0498 |
| 10360 | 2631.6763 | 3.1306 | 0.8663 | 0.0498 |
| 5469  | 2631.9159 | 3.1145 | 0.8657 | 0.0498 |
| 13494 | 2632.6074 | 2.7314 | 0.8655 | 0.0499 |
| 5722  | 2634.6092 | 2.2392 | 0.8663 | 0.05   |

**RankProd algorithm - Genes identified by RankProd to be up regulated  
in TB-interface compared to TA-area with  $p < 0.05$**

| gene.index | RP/Rsum  | FC:(class1/class2) | pfp    | P.value  |  |
|------------|----------|--------------------|--------|----------|--|
| 1436       | 9.9309   | 0.0069             | 0      | 0        |  |
| 2718       | 40.82    | 0.0255             | 0.005  | 0        |  |
| 1252       | 177.7093 | 0.0609             | 0.2433 | 0        |  |
| 19793      | 193.9968 | 0.0724             | 0.2625 | 1.00E-04 |  |
| 8111       | 199.0572 | 0.0666             | 0.222  | 1.00E-04 |  |
| 18834      | 208.7201 | 0.0616             | 0.205  | 1.00E-04 |  |
| 234        | 212.0564 | 0.0597             | 0.1886 | 1.00E-04 |  |
| 5870       | 215.4076 | 0.0752             | 0.17   | 1.00E-04 |  |
| 15678      | 264.7594 | 0.0726             | 0.2611 | 1.00E-04 |  |
| 17560      | 279.0623 | 0.0719             | 0.263  | 1.00E-04 |  |
| 19672      | 336.7788 | 0.0787             | 0.4009 | 2.00E-04 |  |
| 7619       | 373.3491 | 0.1093             | 0.5025 | 3.00E-04 |  |
| 12307      | 376.7996 | 0.0802             | 0.4754 | 3.00E-04 |  |
| 11194      | 411.4934 | 0.106              | 0.58   | 4.00E-04 |  |
| 19090      | 416.6164 | 0.1127             | 0.5527 | 4.00E-04 |  |
| 13720      | 423.5865 | 0.1088             | 0.5475 | 4.00E-04 |  |
| 2423       | 429.583  | 0.1653             | 0.5394 | 4.00E-04 |  |
| 221        | 440.9742 | 0.0929             | 0.5456 | 5.00E-04 |  |
| 5278       | 468.4167 | 0.1163             | 0.6221 | 6.00E-04 |  |
| 5085       | 482.2749 | 0.148              | 0.638  | 6.00E-04 |  |
| 9510       | 484.5014 | 0.1083             | 0.6186 | 6.00E-04 |  |
| 7473       | 487.4145 | 0.1213             | 0.5964 | 6.00E-04 |  |
| 16014      | 488.4766 | 0.1053             | 0.5739 | 6.00E-04 |  |
| 327        | 491.0395 | 0.1362             | 0.5596 | 7.00E-04 |  |
| 8119       | 493.2269 | 0.0953             | 0.544  | 7.00E-04 |  |
| 19998      | 499.0775 | 0.0943             | 0.5404 | 7.00E-04 |  |
| 3600       | 499.1224 | 0.1053             | 0.5204 | 7.00E-04 |  |
| 793        | 503.4651 | 0.1006             | 0.5175 | 7.00E-04 |  |
| 19029      | 509.4955 | 0.1118             | 0.5169 | 7.00E-04 |  |
| 17183      | 513.3841 | 0.1156             | 0.5097 | 7.00E-04 |  |

|       |          |        |        |          |
|-------|----------|--------|--------|----------|
| 6659  | 521.0071 | 0.129  | 0.5113 | 8.00E-04 |
| 20126 | 538.3264 | 0.1396 | 0.5444 | 9.00E-04 |
| 12252 | 548.2772 | 0.1119 | 0.56   | 9.00E-04 |
| 16111 | 552.2419 | 0.1019 | 0.5532 | 9.00E-04 |
| 13476 | 557.482  | 0.1495 | 0.5494 | 9.00E-04 |
| 2198  | 565.8356 | 0.1771 | 0.5589 | 0.001    |
| 1661  | 573.7605 | 0.1395 | 0.567  | 0.001    |
| 16519 | 574.0215 | 0.1265 | 0.5534 | 0.001    |
| 8809  | 575.2043 | 0.1689 | 0.541  | 0.001    |
| 19724 | 577.2136 | 0.1612 | 0.5338 | 0.001    |
| 7905  | 589.2985 | 0.107  | 0.5524 | 0.0011   |
| 17464 | 591.069  | 0.1357 | 0.5429 | 0.0011   |
| 18790 | 593.0985 | 0.1065 | 0.5363 | 0.0011   |
| 13403 | 605.5373 | 0.1333 | 0.5541 | 0.0012   |
| 5487  | 609.4745 | 0.1124 | 0.55   | 0.0012   |
| 16709 | 612.6871 | 0.1339 | 0.5437 | 0.0012   |
| 4288  | 615.0407 | 0.1205 | 0.5357 | 0.0012   |
| 2991  | 615.8322 | 0.1354 | 0.5273 | 0.0012   |
| 13593 | 631.3134 | 0.115  | 0.5476 | 0.0013   |
| 7545  | 659.5269 | 0.1116 | 0.612  | 0.0015   |
| 17754 | 662.3246 | 0.2221 | 0.6075 | 0.0015   |
| 5031  | 668.4381 | 0.1499 | 0.6133 | 0.0016   |
| 15171 | 681.9588 | 0.2416 | 0.6362 | 0.0016   |
| 5960  | 682.4512 | 0.1174 | 0.6265 | 0.0017   |
| 13788 | 691.1518 | 0.1915 | 0.6364 | 0.0017   |
| 14786 | 703.1374 | 0.1494 | 0.6561 | 0.0018   |
| 1525  | 705.554  | 0.142  | 0.6532 | 0.0018   |
| 3808  | 706.2034 | 0.1293 | 0.6443 | 0.0018   |
| 14187 | 715.9979 | 0.1832 | 0.6624 | 0.0019   |
| 19956 | 717.4628 | 0.178  | 0.6548 | 0.0019   |
| 1918  | 720.0759 | 0.1437 | 0.6507 | 0.0019   |
| 2374  | 723.8188 | 0.1391 | 0.6503 | 0.002    |
| 17417 | 740.4525 | 0.1413 | 0.6789 | 0.0021   |
| 1531  | 749.1294 | 0.1663 | 0.6914 | 0.0022   |

|       |          |        |        |        |
|-------|----------|--------|--------|--------|
| 14671 | 752.2536 | 0.1349 | 0.6874 | 0.0022 |
| 14886 | 753.6908 | 0.1526 | 0.6803 | 0.0022 |
| 19714 | 765.2637 | 0.4724 | 0.6997 | 0.0023 |
| 1173  | 772.8856 | 0.2144 | 0.7054 | 0.0023 |
| 16782 | 780.8608 | 0.1467 | 0.712  | 0.0024 |
| 13560 | 784.7274 | 0.1303 | 0.7099 | 0.0024 |
| 17345 | 786.7553 | 0.201  | 0.7037 | 0.0024 |
| 16467 | 789.426  | 0.2035 | 0.6989 | 0.0025 |
| 11257 | 794.8061 | 0.2475 | 0.7014 | 0.0025 |
| 6661  | 795.2134 | 0.192  | 0.6928 | 0.0025 |
| 13815 | 798.294  | 0.1464 | 0.6904 | 0.0025 |
| 6872  | 801.2897 | 0.1591 | 0.6882 | 0.0026 |
| 10990 | 806.575  | 0.2257 | 0.6896 | 0.0026 |
| 238   | 808.3459 | 0.1646 | 0.6837 | 0.0026 |
| 4273  | 810.8953 | 0.1334 | 0.6806 | 0.0026 |
| 18900 | 819.8552 | 0.1527 | 0.693  | 0.0027 |
| 3533  | 827.7864 | 0.1332 | 0.7002 | 0.0028 |
| 14347 | 828.6903 | 0.1624 | 0.6934 | 0.0028 |
| 7659  | 829.0192 | 0.2116 | 0.6858 | 0.0028 |
| 9707  | 830.2292 | 0.2203 | 0.6802 | 0.0028 |
| 19703 | 832.661  | 0.1457 | 0.6772 | 0.0028 |
| 18636 | 846.0281 | 0.1564 | 0.7019 | 0.003  |
| 4464  | 851.706  | 0.1587 | 0.7061 | 0.003  |
| 308   | 852.805  | 0.2044 | 0.7008 | 0.003  |
| 4287  | 858.0567 | 0.1473 | 0.703  | 0.0031 |
| 18192 | 862.3128 | 0.1525 | 0.7033 | 0.0031 |
| 6627  | 864.4083 | 0.1859 | 0.6995 | 0.0031 |
| 2327  | 867.7302 | 0.1442 | 0.6995 | 0.0031 |
| 5710  | 872.8048 | 0.1561 | 0.7028 | 0.0032 |
| 7446  | 877.163  | 0.1609 | 0.7049 | 0.0032 |
| 18461 | 879.8523 | 0.1646 | 0.7029 | 0.0033 |
| 12895 | 881.4736 | 0.1705 | 0.7003 | 0.0033 |
| 6948  | 886.9294 | 0.1473 | 0.7046 | 0.0033 |
| 6895  | 887.2745 | 0.1377 | 0.698  | 0.0033 |

|       |           |        |        |        |
|-------|-----------|--------|--------|--------|
| 20369 | 887.8982  | 0.1802 | 0.6923 | 0.0033 |
| 5895  | 895.417   | 0.1611 | 0.7012 | 0.0034 |
| 7432  | 901.8948  | 0.2351 | 0.7063 | 0.0035 |
| 9826  | 903.0029  | 0.2027 | 0.7016 | 0.0035 |
| 17118 | 903.5934  | 0.166  | 0.696  | 0.0035 |
| 5835  | 910.0008  | 0.1878 | 0.7006 | 0.0036 |
| 10698 | 910.0588  | 0.1615 | 0.6939 | 0.0036 |
| 68    | 913.9264  | 0.1583 | 0.6937 | 0.0036 |
| 11230 | 915.3474  | 0.1439 | 0.6892 | 0.0036 |
| 16286 | 916.2191  | 0.1746 | 0.6847 | 0.0036 |
| 6405  | 918.6451  | 0.2006 | 0.6833 | 0.0036 |
| 11529 | 920.0457  | 0.1577 | 0.679  | 0.0037 |
| 8596  | 926.5587  | 0.1651 | 0.6849 | 0.0037 |
| 9468  | 929.8684  | 0.4237 | 0.6843 | 0.0037 |
| 12941 | 937.238   | 0.1965 | 0.6931 | 0.0038 |
| 16297 | 943.3158  | 0.2088 | 0.7001 | 0.0039 |
| 4186  | 943.3581  | 0.1715 | 0.6941 | 0.0039 |
| 15242 | 944.4624  | 0.1677 | 0.6899 | 0.0039 |
| 422   | 950.8095  | 0.1474 | 0.6952 | 0.004  |
| 15321 | 952.8823  | 0.1628 | 0.6936 | 0.004  |
| 9634  | 959.0831  | 0.1559 | 0.7015 | 0.0041 |
| 17996 | 960.469   | 0.1641 | 0.6981 | 0.0041 |
| 20452 | 968.9884  | 0.3545 | 0.7098 | 0.0042 |
| 18164 | 969.5008  | 0.1958 | 0.7045 | 0.0042 |
| 8798  | 971.9669  | 0.1551 | 0.7036 | 0.0042 |
| 7236  | 974.0696  | 0.154  | 0.7015 | 0.0043 |
| 17284 | 975.6675  | 0.1523 | 0.6994 | 0.0043 |
| 13080 | 984.7978  | 0.1664 | 0.7109 | 0.0044 |
| 3302  | 997.3885  | 0.1656 | 0.7284 | 0.0045 |
| 240   | 1002.6048 | 0.1769 | 0.7329 | 0.0046 |
| 4249  | 1008.9565 | 0.2084 | 0.7391 | 0.0047 |
| 17514 | 1010.7296 | 0.1636 | 0.7362 | 0.0047 |
| 1461  | 1011.119  | 0.1879 | 0.7315 | 0.0047 |
| 6192  | 1012.3864 | 0.2177 | 0.7283 | 0.0047 |

|       |           |        |        |        |
|-------|-----------|--------|--------|--------|
| 2456  | 1016.8991 | 0.2096 | 0.7301 | 0.0047 |
| 17076 | 1017.7469 | 0.172  | 0.7261 | 0.0048 |
| 18680 | 1019.3651 | 0.1625 | 0.7237 | 0.0048 |
| 4328  | 1023.277  | 0.173  | 0.7257 | 0.0048 |
| 7036  | 1024.812  | 0.1924 | 0.7228 | 0.0048 |
| 14749 | 1025.2761 | 0.175  | 0.7183 | 0.0048 |
| 1724  | 1027.5492 | 0.2217 | 0.7174 | 0.0049 |
| 4584  | 1027.6365 | 0.1585 | 0.7127 | 0.0049 |
| 17126 | 1035.5804 | 0.254  | 0.7223 | 0.005  |
| 9044  | 1040.3895 | 0.2682 | 0.7256 | 0.005  |
| 17562 | 1046.5088 | 0.1942 | 0.7308 | 0.0051 |
| 16453 | 1046.7918 | 0.1723 | 0.7262 | 0.0051 |
| 2158  | 1070.3287 | 0.1718 | 0.7643 | 0.0054 |
| 9987  | 1070.6116 | 0.1656 | 0.7597 | 0.0054 |
| 11131 | 1073.5525 | 0.2036 | 0.7606 | 0.0055 |
| 3593  | 1078.365  | 0.2113 | 0.7636 | 0.0055 |
| 1197  | 1080.0022 | 0.1735 | 0.7617 | 0.0055 |
| 13675 | 1081.7016 | 0.1938 | 0.7601 | 0.0056 |
| 5365  | 1085.0222 | 0.1624 | 0.7614 | 0.0056 |
| 11382 | 1097.617  | 0.1778 | 0.7779 | 0.0058 |
| 7199  | 1098.8555 | 0.2102 | 0.7752 | 0.0058 |
| 9942  | 1101.0074 | 0.1971 | 0.774  | 0.0058 |
| 805   | 1101.5879 | 0.3322 | 0.7698 | 0.0058 |
| 12031 | 1103.6975 | 0.1962 | 0.7687 | 0.0059 |
| 20401 | 1103.8061 | 0.1739 | 0.7641 | 0.0059 |
| 2488  | 1104.2377 | 0.1665 | 0.7601 | 0.0059 |
| 18633 | 1106.5223 | 0.1733 | 0.7593 | 0.0059 |
| 16955 | 1108.0197 | 0.2251 | 0.7566 | 0.0059 |
| 3709  | 1110.7849 | 0.1865 | 0.756  | 0.0059 |
| 19715 | 1112.6349 | 0.2152 | 0.7541 | 0.006  |
| 18994 | 1114.8573 | 0.1995 | 0.7534 | 0.006  |
| 11088 | 1118.0165 | 0.1858 | 0.754  | 0.006  |
| 11732 | 1118.0275 | 0.2083 | 0.7495 | 0.006  |
| 3928  | 1125.682  | 0.2374 | 0.7569 | 0.0061 |

|       |           |        |        |        |
|-------|-----------|--------|--------|--------|
| 5158  | 1134.0024 | 0.289  | 0.7681 | 0.0063 |
| 11600 | 1135.9803 | 0.1717 | 0.7667 | 0.0063 |
| 5827  | 1136.4033 | 0.189  | 0.7627 | 0.0063 |
| 5059  | 1145.7156 | 0.1812 | 0.7731 | 0.0064 |
| 14798 | 1145.7729 | 0.1922 | 0.7687 | 0.0064 |
| 10640 | 1146.4739 | 0.3013 | 0.7655 | 0.0064 |
| 5519  | 1148.7535 | 0.2047 | 0.7654 | 0.0065 |
| 18533 | 1154.5322 | 0.2742 | 0.7711 | 0.0066 |
| 17524 | 1154.9309 | 0.204  | 0.7677 | 0.0066 |
| 5653  | 1157.4271 | 0.1891 | 0.7676 | 0.0066 |
| 12171 | 1159.551  | 0.194  | 0.7671 | 0.0066 |
| 5137  | 1160.9417 | 0.1866 | 0.7657 | 0.0067 |
| 7456  | 1161.4482 | 0.1921 | 0.7627 | 0.0067 |
| 17764 | 1170.1409 | 0.2295 | 0.7737 | 0.0068 |
| 3588  | 1176.5336 | 0.1917 | 0.7807 | 0.0069 |
| 17944 | 1182.6282 | 0.2153 | 0.7864 | 0.007  |
| 7397  | 1183.2912 | 0.2114 | 0.7835 | 0.007  |
| 10587 | 1186.575  | 0.2082 | 0.7855 | 0.0071 |
| 18598 | 1189.9935 | 0.1852 | 0.7874 | 0.0071 |
| 2616  | 1190.0849 | 0.2029 | 0.7832 | 0.0071 |
| 4681  | 1192.4518 | 0.1876 | 0.7824 | 0.0072 |
| 17719 | 1199.7286 | 0.1892 | 0.7895 | 0.0073 |
| 7289  | 1199.929  | 0.1791 | 0.7857 | 0.0073 |
| 18706 | 1202.2653 | 0.2245 | 0.7863 | 0.0073 |
| 10223 | 1203.2215 | 0.2159 | 0.7837 | 0.0073 |
| 7713  | 1204.5032 | 0.2347 | 0.7814 | 0.0073 |
| 4061  | 1205.8289 | 0.2048 | 0.7794 | 0.0074 |
| 17500 | 1207.5486 | 0.2492 | 0.7784 | 0.0074 |
| 16750 | 1208.7558 | 0.2874 | 0.7765 | 0.0074 |
| 9299  | 1208.8959 | 0.2477 | 0.7728 | 0.0074 |
| 15451 | 1209.4242 | 0.1998 | 0.7694 | 0.0074 |
| 893   | 1211.4356 | 0.1759 | 0.7687 | 0.0074 |
| 6216  | 1211.844  | 0.3506 | 0.7655 | 0.0074 |
| 8433  | 1215.0544 | 0.2722 | 0.7669 | 0.0075 |



|       |           |        |        |        |
|-------|-----------|--------|--------|--------|
| 10615 | 1218.7159 | 0.1888 | 0.7681 | 0.0075 |
| 11316 | 1222.412  | 0.1943 | 0.7695 | 0.0076 |
| 3936  | 1226.0688 | 0.2179 | 0.7706 | 0.0076 |
| 20268 | 1232.025  | 0.2064 | 0.7758 | 0.0077 |
| 16189 | 1233.237  | 0.2222 | 0.7739 | 0.0078 |
| 16644 | 1238.3018 | 0.2395 | 0.7777 | 0.0078 |
| 11798 | 1252.9317 | 0.1805 | 0.7973 | 0.0081 |
| 19261 | 1257.0472 | 0.2054 | 0.8001 | 0.0081 |
| 19084 | 1257.8764 | 0.3078 | 0.7977 | 0.0081 |
| 3623  | 1258.2219 | 0.2336 | 0.7946 | 0.0082 |
| 3876  | 1263.2654 | 0.1985 | 0.7993 | 0.0082 |
| 2234  | 1263.4177 | 0.2764 | 0.7957 | 0.0082 |
| 18444 | 1268.1584 | 0.1804 | 0.7992 | 0.0083 |
| 7461  | 1270.2294 | 0.1986 | 0.7985 | 0.0084 |
| 4656  | 1275.1613 | 0.2427 | 0.8041 | 0.0084 |
| 4539  | 1281.1261 | 0.2106 | 0.8104 | 0.0086 |
| 15807 | 1282.9839 | 0.202  | 0.8097 | 0.0086 |
| 5708  | 1283.8955 | 0.2193 | 0.8073 | 0.0086 |
| 4953  | 1286.8693 | 0.2074 | 0.808  | 0.0086 |
| 12195 | 1290.0031 | 0.2811 | 0.8095 | 0.0087 |
| 16289 | 1291.7155 | 0.2019 | 0.809  | 0.0087 |
| 5207  | 1291.8612 | 0.2409 | 0.8055 | 0.0087 |
| 6645  | 1293.2192 | 0.3283 | 0.8041 | 0.0088 |
| 4784  | 1306.4653 | 0.2218 | 0.8221 | 0.009  |
| 9007  | 1308.2576 | 0.201  | 0.8213 | 0.009  |
| 3057  | 1319.3889 | 0.2167 | 0.8353 | 0.0092 |
| 4598  | 1322.0604 | 0.2199 | 0.8361 | 0.0093 |
| 16817 | 1325.9496 | 0.2649 | 0.838  | 0.0093 |
| 10365 | 1326.9092 | 0.2376 | 0.8357 | 0.0094 |
| 9239  | 1327.5461 | 0.2506 | 0.8327 | 0.0094 |
| 16565 | 1330.2022 | 0.1985 | 0.8334 | 0.0094 |
| 1642  | 1330.2421 | 0.2315 | 0.8299 | 0.0094 |
| 7569  | 1330.5131 | 0.2065 | 0.8267 | 0.0094 |
| 18394 | 1332.3147 | 0.1895 | 0.8256 | 0.0094 |

|       |           |        |        |        |
|-------|-----------|--------|--------|--------|
| 8682  | 1336.1135 | 0.5897 | 0.8277 | 0.0095 |
| 4013  | 1339.027  | 0.2721 | 0.8292 | 0.0096 |
| 8018  | 1339.7521 | 0.2108 | 0.8265 | 0.0096 |
| 15266 | 1340.2043 | 0.2209 | 0.8238 | 0.0096 |
| 3212  | 1342.3661 | 0.3904 | 0.8241 | 0.0096 |
| 19601 | 1343.1641 | 0.2936 | 0.8222 | 0.0096 |
| 2111  | 1344.5903 | 0.2185 | 0.8209 | 0.0097 |
| 3392  | 1346.0064 | 0.2639 | 0.8196 | 0.0097 |
| 11205 | 1347.5164 | 0.3276 | 0.8182 | 0.0097 |
| 3411  | 1348.5675 | 0.2007 | 0.8166 | 0.0097 |
| 11152 | 1355.4326 | 0.2128 | 0.8234 | 0.0099 |
| 11953 | 1363.9574 | 0.1968 | 0.8346 | 0.01   |
| 5390  | 1366.6316 | 0.3199 | 0.8355 | 0.0101 |
| 3188  | 1368.1365 | 0.2958 | 0.8344 | 0.0101 |
| 11241 | 1368.495  | 0.2731 | 0.8316 | 0.0101 |
| 5037  | 1370.1744 | 0.2001 | 0.8308 | 0.0102 |
| 14231 | 1371.8783 | 0.2524 | 0.8306 | 0.0102 |
| 2145  | 1378.0563 | 0.2234 | 0.8367 | 0.0103 |
| 2653  | 1379.4918 | 0.2304 | 0.8351 | 0.0103 |
| 8549  | 1381.6456 | 0.2595 | 0.835  | 0.0104 |
| 1972  | 1384.2573 | 0.2459 | 0.8354 | 0.0104 |
| 1853  | 1384.4393 | 0.3261 | 0.8326 | 0.0104 |
| 2846  | 1388.807  | 0.22   | 0.8365 | 0.0105 |
| 5081  | 1390.7766 | 0.2134 | 0.8363 | 0.0105 |
| 4943  | 1391.1439 | 0.2103 | 0.8337 | 0.0106 |
| 18620 | 1392.9523 | 0.267  | 0.8337 | 0.0106 |
| 5668  | 1394.347  | 0.2247 | 0.8326 | 0.0106 |
| 10715 | 1397.325  | 0.5402 | 0.834  | 0.0107 |
| 16947 | 1398.5906 | 0.2389 | 0.8328 | 0.0107 |
| 2380  | 1399.0112 | 0.4047 | 0.8302 | 0.0107 |
| 1053  | 1399.5941 | 0.2762 | 0.8282 | 0.0107 |
| 3769  | 1405.2073 | 0.2344 | 0.8341 | 0.0108 |
| 7900  | 1410.1215 | 0.201  | 0.8388 | 0.0109 |
| 12675 | 1411.3536 | 0.2223 | 0.8376 | 0.011  |

|       |           |        |        |        |
|-------|-----------|--------|--------|--------|
| 4084  | 1412.8851 | 0.6724 | 0.8371 | 0.011  |
| 15088 | 1413.0953 | 0.2199 | 0.8345 | 0.011  |
| 19717 | 1413.8671 | 0.211  | 0.8329 | 0.011  |
| 2086  | 1415.2581 | 0.2165 | 0.8314 | 0.0111 |
| 14533 | 1420.7669 | 0.2137 | 0.8353 | 0.0111 |
| 12001 | 1424.2253 | 0.2594 | 0.8372 | 0.0112 |
| 8325  | 1424.7943 | 0.2477 | 0.8351 | 0.0112 |
| 2961  | 1426.3627 | 0.2412 | 0.8342 | 0.0113 |
| 14563 | 1427.2809 | 0.2345 | 0.8326 | 0.0113 |
| 16764 | 1431.2314 | 0.3409 | 0.8352 | 0.0113 |
| 14226 | 1432.0958 | 0.2484 | 0.8334 | 0.0114 |
| 11625 | 1432.2575 | 0.2194 | 0.8306 | 0.0114 |
| 13717 | 1433.0279 | 0.221  | 0.8289 | 0.0114 |
| 9171  | 1435.8372 | 0.2074 | 0.8298 | 0.0114 |
| 14441 | 1437.8207 | 0.2673 | 0.8292 | 0.0115 |
| 19066 | 1438.0761 | 0.2385 | 0.8268 | 0.0115 |
| 18471 | 1438.1455 | 0.2132 | 0.824  | 0.0115 |
| 18561 | 1441.9522 | 0.2455 | 0.8263 | 0.0116 |
| 4462  | 1442.2537 | 0.2182 | 0.8239 | 0.0116 |
| 5677  | 1444.2532 | 0.2255 | 0.8236 | 0.0116 |
| 12823 | 1445.6618 | 0.2542 | 0.8228 | 0.0116 |
| 4787  | 1448.3092 | 0.2663 | 0.824  | 0.0117 |
| 10357 | 1452.0647 | 0.2236 | 0.8263 | 0.0118 |
| 13038 | 1454.2797 | 0.2375 | 0.8259 | 0.0118 |
| 7671  | 1457.0381 | 0.5132 | 0.8272 | 0.0118 |
| 5451  | 1457.6843 | 0.2238 | 0.8254 | 0.0119 |
| 17577 | 1459.3587 | 0.3081 | 0.825  | 0.0119 |
| 19871 | 1461.8732 | 0.2151 | 0.8264 | 0.012  |
| 20048 | 1465.2457 | 0.2529 | 0.8278 | 0.012  |
| 13064 | 1465.2628 | 0.2559 | 0.8251 | 0.012  |
| 5973  | 1469.1133 | 0.2145 | 0.8276 | 0.0121 |
| 6951  | 1469.2823 | 0.2519 | 0.8251 | 0.0121 |
| 12704 | 1471.2068 | 0.2594 | 0.8254 | 0.0121 |
| 9850  | 1471.274  | 0.2269 | 0.8227 | 0.0121 |

|       |           |        |        |        |
|-------|-----------|--------|--------|--------|
| 16643 | 1471.931  | 0.2854 | 0.8209 | 0.0122 |
| 2885  | 1476.8894 | 0.2575 | 0.8245 | 0.0123 |
| 7968  | 1478.7673 | 0.2491 | 0.8245 | 0.0123 |
| 836   | 1479.0961 | 0.225  | 0.8222 | 0.0123 |
| 13177 | 1481.2204 | 0.2347 | 0.8231 | 0.0124 |
| 3618  | 1489.5239 | 0.8337 | 0.8322 | 0.0125 |
| 7698  | 1490.2915 | 0.2227 | 0.8308 | 0.0125 |
| 20068 | 1491.3674 | 0.2398 | 0.8298 | 0.0126 |
| 9090  | 1491.581  | 0.2391 | 0.8274 | 0.0126 |
| 19469 | 1492.9165 | 0.2725 | 0.8263 | 0.0126 |
| 15348 | 1493.7972 | 0.2498 | 0.8246 | 0.0126 |
| 3583  | 1494.4146 | 0.2209 | 0.8227 | 0.0126 |
| 4437  | 1497.9495 | 0.2572 | 0.8252 | 0.0127 |
| 12771 | 1503.4265 | 0.2265 | 0.8307 | 0.0128 |
| 15316 | 1503.6563 | 0.2305 | 0.8286 | 0.0128 |
| 15488 | 1505.9173 | 0.2467 | 0.829  | 0.0129 |
| 2339  | 1506.3884 | 0.2271 | 0.8272 | 0.0129 |
| 4707  | 1506.7335 | 0.3311 | 0.825  | 0.0129 |
| 14922 | 1509.0348 | 0.2738 | 0.8257 | 0.013  |
| 15361 | 1515.832  | 0.2239 | 0.8318 | 0.0131 |
| 10326 | 1516.9155 | 0.2775 | 0.8308 | 0.0131 |
| 12287 | 1517.6553 | 0.2671 | 0.8293 | 0.0131 |
| 15947 | 1517.9834 | 0.3291 | 0.8271 | 0.0131 |
| 4257  | 1518.5932 | 0.2482 | 0.8255 | 0.0132 |
| 4967  | 1523.7348 | 0.2182 | 0.8308 | 0.0133 |
| 14257 | 1524.375  | 0.2697 | 0.8291 | 0.0133 |
| 18466 | 1524.591  | 0.2275 | 0.8269 | 0.0133 |
| 18859 | 1528.1682 | 0.2352 | 0.8291 | 0.0134 |
| 16491 | 1528.5394 | 0.2499 | 0.8272 | 0.0134 |
| 11963 | 1528.6373 | 0.4145 | 0.8249 | 0.0134 |
| 15280 | 1529.0639 | 0.2188 | 0.8231 | 0.0134 |
| 7789  | 1529.8218 | 0.4662 | 0.8217 | 0.0134 |
| 18693 | 1532.7422 | 0.2238 | 0.8236 | 0.0135 |
| 2396  | 1535.9533 | 0.2184 | 0.8258 | 0.0136 |

|       |           |        |        |        |
|-------|-----------|--------|--------|--------|
| 8059  | 1540.6596 | 0.2616 | 0.8291 | 0.0137 |
| 18738 | 1541.3829 | 0.2233 | 0.8275 | 0.0137 |
| 9106  | 1542.6788 | 0.2618 | 0.8268 | 0.0137 |
| 20220 | 1544.1431 | 0.245  | 0.8261 | 0.0137 |
| 11193 | 1544.3515 | 0.3215 | 0.8242 | 0.0137 |
| 12899 | 1545.6588 | 0.2708 | 0.8237 | 0.0138 |
| 17581 | 1546.2044 | 0.2362 | 0.8219 | 0.0138 |
| 14714 | 1552.7487 | 0.2634 | 0.8274 | 0.0139 |
| 1117  | 1556.9957 | 0.236  | 0.8312 | 0.014  |
| 18468 | 1558.9818 | 0.2773 | 0.8313 | 0.0141 |
| 16239 | 1562.9076 | 0.3204 | 0.8345 | 0.0142 |
| 630   | 1564.4262 | 0.2241 | 0.8342 | 0.0142 |
| 3419  | 1565.0519 | 0.2339 | 0.8326 | 0.0142 |
| 2527  | 1567.3974 | 0.2863 | 0.8336 | 0.0143 |
| 5818  | 1567.7156 | 0.2213 | 0.8316 | 0.0143 |
| 15314 | 1568.1446 | 0.2479 | 0.8298 | 0.0143 |
| 8359  | 1575.824  | 0.2716 | 0.8367 | 0.0144 |
| 1766  | 1575.8668 | 0.2558 | 0.8344 | 0.0144 |
| 2999  | 1576.6613 | 0.2603 | 0.8332 | 0.0145 |
| 4619  | 1578.5877 | 0.241  | 0.833  | 0.0145 |
| 12311 | 1579.3296 | 0.2697 | 0.8317 | 0.0145 |
| 17281 | 1583.6939 | 0.306  | 0.8358 | 0.0146 |
| 14680 | 1583.7342 | 0.4247 | 0.8335 | 0.0146 |
| 12166 | 1584.5233 | 0.2358 | 0.8322 | 0.0146 |
| 19630 | 1585.5613 | 0.226  | 0.8311 | 0.0147 |
| 5000  | 1591.2702 | 0.2199 | 0.836  | 0.0148 |
| 7497  | 1593.6371 | 0.2675 | 0.8369 | 0.0148 |
| 15376 | 1597.2732 | 0.2652 | 0.8396 | 0.0149 |
| 17496 | 1599.23   | 0.26   | 0.8399 | 0.015  |
| 13624 | 1601.6473 | 0.2295 | 0.8407 | 0.015  |
| 211   | 1613.8838 | 0.3399 | 0.8548 | 0.0153 |
| 13983 | 1615.1631 | 0.2435 | 0.8543 | 0.0154 |
| 15875 | 1615.3998 | 0.3208 | 0.8522 | 0.0154 |
| 9663  | 1616.5248 | 0.2233 | 0.8512 | 0.0154 |

|       |           |        |        |        |
|-------|-----------|--------|--------|--------|
| 3090  | 1616.737  | 0.2757 | 0.8492 | 0.0154 |
| 17381 | 1621.5745 | 0.4409 | 0.8528 | 0.0155 |
| 12202 | 1624.0455 | 0.3198 | 0.8535 | 0.0156 |
| 7277  | 1624.4274 | 0.2426 | 0.8518 | 0.0156 |
| 146   | 1625.6447 | 0.2912 | 0.8511 | 0.0156 |
| 17087 | 1626.9425 | 0.2677 | 0.8503 | 0.0156 |
| 12691 | 1627.2235 | 0.3266 | 0.8484 | 0.0156 |
| 5269  | 1631.0852 | 0.2379 | 0.8506 | 0.0157 |
| 14240 | 1631.8913 | 0.2289 | 0.8498 | 0.0157 |
| 13756 | 1632.8284 | 0.2672 | 0.8487 | 0.0158 |
| 11365 | 1633.1993 | 0.3413 | 0.8471 | 0.0158 |
| 15632 | 1635.3022 | 0.2663 | 0.8477 | 0.0158 |
| 169   | 1635.4669 | 0.2496 | 0.8459 | 0.0158 |
| 19303 | 1636.4454 | 0.3029 | 0.8453 | 0.0159 |
| 16154 | 1643.5129 | 0.3202 | 0.8525 | 0.016  |
| 1998  | 1644.3206 | 0.2414 | 0.8512 | 0.0161 |
| 2439  | 1644.5124 | 0.2817 | 0.8493 | 0.0161 |
| 2717  | 1646.2124 | 0.2657 | 0.8498 | 0.0161 |
| 17045 | 1647.0035 | 0.3154 | 0.8488 | 0.0161 |
| 14484 | 1647.0138 | 0.2826 | 0.8466 | 0.0161 |
| 4177  | 1647.9175 | 0.2717 | 0.8453 | 0.0162 |
| 441   | 1648.0268 | 0.3763 | 0.8434 | 0.0162 |
| 16932 | 1649.9845 | 0.25   | 0.8437 | 0.0162 |
| 9884  | 1655.3565 | 0.2305 | 0.8486 | 0.0163 |
| 8605  | 1655.9548 | 0.2372 | 0.8471 | 0.0164 |
| 1084  | 1656.8865 | 0.3137 | 0.8463 | 0.0164 |
| 17027 | 1657.8729 | 0.2628 | 0.8454 | 0.0164 |
| 13888 | 1659.2975 | 0.2905 | 0.8454 | 0.0164 |
| 10724 | 1659.4142 | 0.4383 | 0.8434 | 0.0164 |
| 1799  | 1661.8524 | 0.3059 | 0.844  | 0.0165 |
| 3986  | 1663.0615 | 0.2932 | 0.8431 | 0.0165 |
| 9819  | 1663.5467 | 0.3539 | 0.8415 | 0.0165 |
| 914   | 1663.7359 | 0.2633 | 0.8397 | 0.0165 |
| 4835  | 1664.7979 | 0.2356 | 0.839  | 0.0166 |

|       |           |        |        |        |
|-------|-----------|--------|--------|--------|
| 16401 | 1666.3724 | 0.2467 | 0.8392 | 0.0166 |
| 6808  | 1672.1816 | 0.2489 | 0.8449 | 0.0168 |
| 16858 | 1679.0215 | 0.2345 | 0.8508 | 0.0169 |
| 3072  | 1679.3278 | 0.376  | 0.8492 | 0.0169 |
| 18852 | 1682.3923 | 0.2404 | 0.8505 | 0.017  |
| 18487 | 1684.4271 | 0.3111 | 0.8511 | 0.0171 |
| 1372  | 1685.1944 | 0.2592 | 0.8497 | 0.0171 |
| 2500  | 1689.6075 | 0.2397 | 0.8535 | 0.0172 |
| 10578 | 1689.6887 | 0.3269 | 0.8516 | 0.0172 |
| 4241  | 1693.2989 | 0.303  | 0.8536 | 0.0173 |
| 7615  | 1694.7274 | 0.3196 | 0.8533 | 0.0173 |
| 16843 | 1695.8852 | 0.2784 | 0.8525 | 0.0173 |
| 20259 | 1697.192  | 0.3034 | 0.852  | 0.0174 |
| 1841  | 1697.7788 | 0.3188 | 0.8505 | 0.0174 |
| 10545 | 1698.1087 | 0.2461 | 0.8488 | 0.0174 |
| 20159 | 1699.622  | 0.3647 | 0.8487 | 0.0174 |
| 15351 | 1702.1172 | 0.237  | 0.8496 | 0.0175 |
| 15851 | 1705.0489 | 0.292  | 0.8516 | 0.0176 |
| 4638  | 1706.8787 | 0.2543 | 0.8516 | 0.0176 |
| 6341  | 1709.1466 | 0.376  | 0.8528 | 0.0177 |
| 3464  | 1715.0016 | 0.2569 | 0.8581 | 0.0178 |
| 3181  | 1715.0676 | 0.2811 | 0.8562 | 0.0178 |
| 12509 | 1715.2056 | 0.4533 | 0.8543 | 0.0178 |
| 18676 | 1717.5954 | 0.2521 | 0.8548 | 0.0179 |
| 19157 | 1717.9573 | 0.2745 | 0.8534 | 0.0179 |
| 2886  | 1718.9739 | 0.3267 | 0.8526 | 0.0179 |
| 4925  | 1720.9155 | 0.314  | 0.8527 | 0.018  |
| 10669 | 1721.4088 | 0.3819 | 0.8511 | 0.018  |
| 10293 | 1724.489  | 0.2511 | 0.8531 | 0.0181 |
| 7406  | 1725.533  | 0.274  | 0.8527 | 0.0181 |
| 1163  | 1726.6936 | 0.2498 | 0.8521 | 0.0181 |
| 868   | 1731.3908 | 0.2786 | 0.8563 | 0.0182 |
| 15183 | 1732.0093 | 0.266  | 0.8551 | 0.0183 |
| 5547  | 1733.8522 | 0.2484 | 0.8551 | 0.0183 |

|       |           |        |        |        |
|-------|-----------|--------|--------|--------|
| 3528  | 1734.3133 | 0.2707 | 0.8537 | 0.0183 |
| 11802 | 1736.1682 | 0.3016 | 0.8543 | 0.0184 |
| 7971  | 1736.3158 | 0.3767 | 0.8527 | 0.0184 |
| 7741  | 1736.7049 | 0.2786 | 0.8513 | 0.0184 |
| 12302 | 1739.416  | 0.2613 | 0.8525 | 0.0185 |
| 15001 | 1739.7665 | 0.2409 | 0.8511 | 0.0185 |
| 7627  | 1740.617  | 0.2556 | 0.8504 | 0.0185 |
| 19594 | 1742.5841 | 0.2583 | 0.8507 | 0.0185 |
| 16337 | 1745.4546 | 0.259  | 0.8525 | 0.0186 |
| 7680  | 1746.9263 | 0.248  | 0.8525 | 0.0187 |
| 10082 | 1755.1329 | 0.2482 | 0.86   | 0.0189 |
| 15593 | 1755.2411 | 0.259  | 0.8582 | 0.0189 |
| 3757  | 1756.6697 | 0.2751 | 0.8582 | 0.0189 |
| 8156  | 1756.8523 | 0.3511 | 0.8566 | 0.0189 |
| 4878  | 1764.0993 | 0.3122 | 0.8629 | 0.0191 |
| 19226 | 1765.4216 | 0.2439 | 0.8625 | 0.0191 |
| 4334  | 1766.903  | 0.4168 | 0.8624 | 0.0192 |
| 12453 | 1768.1134 | 0.2505 | 0.862  | 0.0192 |
| 20258 | 1769.6099 | 0.3218 | 0.8621 | 0.0193 |
| 5937  | 1770.9579 | 0.2465 | 0.8621 | 0.0193 |
| 5889  | 1770.9735 | 0.3161 | 0.8603 | 0.0193 |
| 2881  | 1772.0015 | 0.3346 | 0.8596 | 0.0193 |
| 15239 | 1773.4218 | 0.2542 | 0.8593 | 0.0194 |
| 15655 | 1773.6968 | 0.3169 | 0.8577 | 0.0194 |
| 16200 | 1780.3009 | 0.3279 | 0.8638 | 0.0195 |
| 3227  | 1786.3717 | 0.2685 | 0.8692 | 0.0197 |
| 16707 | 1787.3469 | 0.2996 | 0.8684 | 0.0197 |
| 15103 | 1788.587  | 0.356  | 0.8678 | 0.0198 |
| 3196  | 1788.9068 | 0.4773 | 0.8664 | 0.0198 |
| 13930 | 1791.0498 | 0.2488 | 0.8674 | 0.0198 |
| 1349  | 1792.5118 | 0.4918 | 0.8671 | 0.0199 |
| 16773 | 1794.1953 | 0.2605 | 0.867  | 0.0199 |
| 10481 | 1794.4489 | 0.7117 | 0.8655 | 0.0199 |
| 14881 | 1796.3643 | 0.2708 | 0.8658 | 0.02   |



|       |           |        |        |        |
|-------|-----------|--------|--------|--------|
| 8443  | 1796.9915 | 0.265  | 0.8648 | 0.02   |
| 11717 | 1797.8173 | 0.2433 | 0.8641 | 0.02   |
| 14256 | 1798.3999 | 0.4412 | 0.8629 | 0.02   |
| 18855 | 1799.6469 | 0.2556 | 0.8623 | 0.0201 |
| 16101 | 1800.3245 | 0.3628 | 0.8612 | 0.0201 |
| 13970 | 1805.3104 | 0.2544 | 0.8644 | 0.0202 |
| 17926 | 1806.6793 | 0.3993 | 0.8645 | 0.0202 |
| 14774 | 1807.5517 | 0.2513 | 0.8636 | 0.0203 |
| 5836  | 1808.3705 | 0.2529 | 0.8628 | 0.0203 |
| 2294  | 1812.1712 | 0.2573 | 0.8651 | 0.0204 |
| 7755  | 1814.7884 | 0.2987 | 0.866  | 0.0204 |
| 12501 | 1816.09   | 0.2977 | 0.8661 | 0.0205 |
| 3337  | 1821.9658 | 0.3422 | 0.8706 | 0.0206 |
| 19375 | 1822.4965 | 0.2648 | 0.8693 | 0.0206 |
| 20378 | 1823.1164 | 0.3642 | 0.868  | 0.0207 |
| 2820  | 1829.0749 | 0.3536 | 0.8741 | 0.0208 |
| 9139  | 1830.8524 | 0.2622 | 0.8748 | 0.0209 |
| 13473 | 1832.0449 | 0.3436 | 0.8746 | 0.0209 |
| 20340 | 1833.6064 | 0.3541 | 0.8745 | 0.021  |
| 9853  | 1836.1323 | 0.2764 | 0.8753 | 0.021  |
| 10666 | 1836.2268 | 0.2569 | 0.8736 | 0.0211 |
| 2229  | 1838.4783 | 0.3444 | 0.8744 | 0.0211 |
| 4085  | 1841.7205 | 0.4543 | 0.8764 | 0.0212 |
| 18854 | 1843.4757 | 0.2745 | 0.8768 | 0.0213 |
| 4182  | 1847.0729 | 0.6191 | 0.8798 | 0.0214 |
| 9674  | 1850.2635 | 0.4319 | 0.8816 | 0.0215 |
| 18571 | 1850.6955 | 0.2822 | 0.8802 | 0.0215 |
| 15439 | 1853.9958 | 0.3541 | 0.8822 | 0.0216 |
| 7396  | 1855.8512 | 0.2924 | 0.8824 | 0.0216 |
| 9005  | 1860.3033 | 0.2855 | 0.8855 | 0.0217 |
| 19068 | 1866.0602 | 0.2786 | 0.8904 | 0.0219 |
| 2191  | 1866.8544 | 0.2816 | 0.8895 | 0.0219 |
| 4195  | 1868.5069 | 0.3387 | 0.8895 | 0.022  |
| 1267  | 1868.6674 | 0.3046 | 0.888  | 0.022  |

|       |           |        |        |        |
|-------|-----------|--------|--------|--------|
| 19908 | 1869.6257 | 0.288  | 0.8874 | 0.022  |
| 13816 | 1870.6748 | 0.2747 | 0.8869 | 0.022  |
| 16940 | 1871.3193 | 0.3864 | 0.886  | 0.022  |
| 8812  | 1872.2379 | 0.455  | 0.8854 | 0.0221 |
| 12779 | 1872.613  | 0.2675 | 0.8842 | 0.0221 |
| 20315 | 1873.7903 | 0.3855 | 0.8837 | 0.0221 |
| 11364 | 1878.3063 | 0.306  | 0.8873 | 0.0222 |
| 18982 | 1883.0928 | 0.3582 | 0.8913 | 0.0224 |
| 6347  | 1883.2311 | 0.2838 | 0.8897 | 0.0224 |
| 5911  | 1883.296  | 0.4186 | 0.8881 | 0.0224 |
| 11444 | 1884.9244 | 0.3692 | 0.8882 | 0.0224 |
| 17272 | 1886.2401 | 0.291  | 0.8883 | 0.0225 |
| 11606 | 1888.1754 | 0.2597 | 0.8887 | 0.0225 |
| 2490  | 1888.5375 | 0.3001 | 0.8874 | 0.0226 |
| 5845  | 1893.9485 | 0.5927 | 0.892  | 0.0227 |
| 19484 | 1896.8567 | 0.2906 | 0.8936 | 0.0228 |
| 773   | 1897.5429 | 0.4069 | 0.8928 | 0.0228 |
| 13037 | 1897.9345 | 0.2788 | 0.8913 | 0.0228 |
| 5545  | 1900.9067 | 0.3281 | 0.8931 | 0.0229 |
| 16418 | 1901.656  | 0.2654 | 0.8925 | 0.0229 |
| 12600 | 1901.6698 | 0.255  | 0.8908 | 0.0229 |
| 14320 | 1903.5715 | 0.2634 | 0.8917 | 0.023  |
| 10332 | 1903.6196 | 0.2648 | 0.8901 | 0.023  |
| 7863  | 1907.513  | 0.3308 | 0.8929 | 0.0231 |
| 4158  | 1908.0243 | 0.2765 | 0.8919 | 0.0231 |
| 19329 | 1909.1521 | 0.2701 | 0.8913 | 0.0232 |
| 19408 | 1909.93   | 0.2786 | 0.8906 | 0.0232 |
| 4811  | 1911.2747 | 0.2879 | 0.8907 | 0.0232 |
| 18416 | 1911.4607 | 0.2865 | 0.8894 | 0.0233 |
| 18189 | 1915.0445 | 0.2838 | 0.8917 | 0.0234 |
| 11523 | 1917.0636 | 0.3046 | 0.892  | 0.0234 |
| 18178 | 1918.0044 | 0.3807 | 0.8911 | 0.0234 |
| 2574  | 1919.0721 | 0.2895 | 0.8907 | 0.0235 |
| 14083 | 1921.2884 | 0.3387 | 0.892  | 0.0235 |

|       |           |        |        |        |
|-------|-----------|--------|--------|--------|
| 13782 | 1921.8121 | 0.2726 | 0.8912 | 0.0236 |
| 5340  | 1923.9126 | 0.2852 | 0.8925 | 0.0236 |
| 5749  | 1926.5689 | 0.4996 | 0.8938 | 0.0237 |
| 6881  | 1928.6801 | 0.3076 | 0.8947 | 0.0238 |
| 3174  | 1929.3432 | 0.4748 | 0.8938 | 0.0238 |
| 13714 | 1930.2117 | 0.3592 | 0.8932 | 0.0238 |
| 4525  | 1930.9907 | 0.3016 | 0.8925 | 0.0239 |
| 9020  | 1931.8756 | 0.3185 | 0.8918 | 0.0239 |
| 13892 | 1932.0395 | 0.3864 | 0.8905 | 0.0239 |
| 2094  | 1937.3909 | 0.3036 | 0.8948 | 0.0241 |
| 691   | 1937.7397 | 0.3981 | 0.8936 | 0.0241 |
| 5349  | 1937.8629 | 1.0402 | 0.8921 | 0.0241 |
| 6500  | 1942.5048 | 0.4113 | 0.8959 | 0.0242 |
| 18623 | 1942.6902 | 0.4117 | 0.8945 | 0.0242 |
| 5824  | 1944.1021 | 0.2716 | 0.8946 | 0.0243 |
| 3342  | 1945.4182 | 0.2944 | 0.8944 | 0.0243 |
| 7273  | 1948.8196 | 0.268  | 0.8968 | 0.0244 |
| 8408  | 1949.2879 | 0.2808 | 0.8959 | 0.0244 |
| 7624  | 1949.9046 | 0.2751 | 0.8949 | 0.0244 |
| 4842  | 1951.7805 | 0.934  | 0.8954 | 0.0245 |
| 15005 | 1952.0445 | 0.2999 | 0.8941 | 0.0245 |
| 17696 | 1953.2461 | 0.2703 | 0.8938 | 0.0246 |
| 2369  | 1955.6367 | 0.3229 | 0.8947 | 0.0246 |
| 8401  | 1956.5718 | 0.3097 | 0.8941 | 0.0246 |
| 4205  | 1957.2441 | 0.2978 | 0.8934 | 0.0247 |
| 5956  | 1957.71   | 0.27   | 0.8923 | 0.0247 |
| 5918  | 1958.6737 | 0.3194 | 0.8917 | 0.0247 |
| 10634 | 1959.4203 | 0.421  | 0.891  | 0.0247 |
| 14438 | 1959.9138 | 0.396  | 0.8899 | 0.0247 |
| 1677  | 1960.1267 | 0.4326 | 0.8886 | 0.0248 |
| 3489  | 1960.3127 | 0.279  | 0.8874 | 0.0248 |
| 11304 | 1960.6683 | 0.2949 | 0.8861 | 0.0248 |
| 6161  | 1961.3305 | 0.4342 | 0.8853 | 0.0248 |
| 13787 | 1963.5897 | 0.2702 | 0.8863 | 0.0249 |

|       |           |        |        |        |
|-------|-----------|--------|--------|--------|
| 8632  | 1968.8743 | 0.2935 | 0.8905 | 0.025  |
| 19038 | 1971.6559 | 0.3193 | 0.8918 | 0.0251 |
| 16422 | 1973.5251 | 0.3028 | 0.8923 | 0.0252 |
| 4700  | 1976.0294 | 0.2755 | 0.893  | 0.0252 |
| 9225  | 1976.1195 | 0.7173 | 0.8916 | 0.0252 |
| 4335  | 1976.4984 | 0.2977 | 0.8905 | 0.0252 |
| 13380 | 1979.1083 | 0.2776 | 0.8915 | 0.0253 |
| 13265 | 1980.8183 | 0.2715 | 0.8922 | 0.0254 |
| 2516  | 1981.6887 | 0.2658 | 0.8916 | 0.0254 |
| 7264  | 1983.4068 | 0.3278 | 0.892  | 0.0255 |
| 7777  | 1983.5228 | 0.4681 | 0.8906 | 0.0255 |
| 11156 | 1984.6999 | 0.307  | 0.8901 | 0.0255 |
| 4156  | 1986.5177 | 0.3895 | 0.8904 | 0.0255 |
| 3485  | 1986.7469 | 0.3567 | 0.8891 | 0.0256 |
| 4005  | 1986.927  | 0.2868 | 0.8877 | 0.0256 |
| 6633  | 1987.3978 | 1.0742 | 0.8866 | 0.0256 |
| 17032 | 1987.75   | 0.2736 | 0.8856 | 0.0256 |
| 13662 | 1988.5699 | 0.2828 | 0.885  | 0.0256 |
| 19591 | 1989.1717 | 0.2982 | 0.8842 | 0.0256 |
| 3310  | 1991.2056 | 0.3026 | 0.8851 | 0.0257 |
| 13795 | 1993.3557 | 0.2809 | 0.8859 | 0.0258 |
| 5541  | 1993.364  | 0.4688 | 0.8845 | 0.0258 |
| 8673  | 1993.5576 | 0.3608 | 0.8832 | 0.0258 |
| 19600 | 1994.9928 | 0.4456 | 0.8834 | 0.0258 |
| 9167  | 1995.5798 | 0.2863 | 0.8825 | 0.0258 |
| 12950 | 1998.4224 | 0.2885 | 0.8839 | 0.0259 |
| 7664  | 1999.1682 | 0.4923 | 0.8832 | 0.0259 |
| 2502  | 2000.4555 | 0.5037 | 0.8838 | 0.026  |
| 15652 | 2000.6102 | 0.2681 | 0.8824 | 0.026  |
| 14036 | 2002.5863 | 0.3978 | 0.883  | 0.0261 |
| 19649 | 2003.088  | 0.3114 | 0.8819 | 0.0261 |
| 875   | 2004.0382 | 0.2798 | 0.8814 | 0.0261 |
| 16642 | 2006.5958 | 0.3737 | 0.8829 | 0.0262 |
| 14567 | 2007.7075 | 0.2837 | 0.8825 | 0.0262 |

|       |           |        |        |        |
|-------|-----------|--------|--------|--------|
| 14322 | 2008.0646 | 0.3549 | 0.8814 | 0.0262 |
| 4416  | 2009.2013 | 0.2915 | 0.8811 | 0.0263 |
| 8792  | 2009.3505 | 0.2795 | 0.8799 | 0.0263 |
| 2963  | 2011.0159 | 0.3555 | 0.88   | 0.0263 |
| 2020  | 2011.0884 | 0.3021 | 0.8787 | 0.0263 |
| 655   | 2012.3891 | 0.2969 | 0.8792 | 0.0264 |
| 8338  | 2012.4945 | 0.2811 | 0.8778 | 0.0264 |
| 8384  | 2015.5338 | 0.3514 | 0.8796 | 0.0265 |
| 229   | 2017.9664 | 0.2705 | 0.881  | 0.0266 |
| 1484  | 2018.2094 | 0.2749 | 0.8799 | 0.0266 |
| 9285  | 2018.2238 | 0.313  | 0.8785 | 0.0266 |
| 13651 | 2019.7501 | 0.3135 | 0.8789 | 0.0266 |
| 5474  | 2025.1128 | 0.2974 | 0.8828 | 0.0268 |
| 5247  | 2025.559  | 0.2883 | 0.8818 | 0.0268 |
| 6901  | 2026.8682 | 0.3069 | 0.8817 | 0.0268 |
| 8162  | 2030.5408 | 0.293  | 0.8844 | 0.027  |
| 6507  | 2038.2249 | 0.2965 | 0.8906 | 0.0272 |
| 13478 | 2038.6729 | 0.2897 | 0.8896 | 0.0272 |
| 767   | 2039.4884 | 0.3141 | 0.8892 | 0.0272 |
| 5289  | 2039.5121 | 0.6261 | 0.8878 | 0.0272 |
| 4872  | 2042.471  | 0.3548 | 0.889  | 0.0273 |
| 11952 | 2044.4548 | 0.2801 | 0.8897 | 0.0274 |
| 4815  | 2046.5567 | 0.2783 | 0.8904 | 0.0275 |
| 4285  | 2047.4242 | 0.462  | 0.8901 | 0.0275 |
| 10705 | 2053.7466 | 0.3226 | 0.8954 | 0.0277 |
| 3674  | 2055.0503 | 0.3093 | 0.8953 | 0.0277 |
| 5674  | 2056.6424 | 0.2805 | 0.8956 | 0.0278 |
| 3329  | 2058.9558 | 0.285  | 0.8969 | 0.0279 |
| 12755 | 2059.377  | 0.2972 | 0.8958 | 0.0279 |
| 7954  | 2060.2661 | 0.2831 | 0.8954 | 0.0279 |
| 1060  | 2061.5747 | 0.3016 | 0.8954 | 0.028  |
| 7745  | 2061.8091 | 0.2788 | 0.8942 | 0.028  |
| 20314 | 2065.8383 | 0.3779 | 0.8969 | 0.0281 |
| 15508 | 2070.8162 | 0.2856 | 0.901  | 0.0283 |

|       |           |        |        |        |
|-------|-----------|--------|--------|--------|
| 10288 | 2070.8352 | 0.4775 | 0.8996 | 0.0283 |
| 2409  | 2073.0023 | 0.2834 | 0.9007 | 0.0283 |
| 3979  | 2073.1394 | 0.3825 | 0.8994 | 0.0284 |
| 14996 | 2073.4961 | 0.3109 | 0.8983 | 0.0284 |
| 5286  | 2074.6167 | 0.3406 | 0.8981 | 0.0284 |
| 15254 | 2075.951  | 0.3147 | 0.8982 | 0.0284 |
| 15102 | 2077.668  | 0.3594 | 0.8986 | 0.0285 |
| 18352 | 2078.097  | 0.3153 | 0.8976 | 0.0285 |
| 13251 | 2078.3137 | 0.3154 | 0.8965 | 0.0285 |
| 4296  | 2079.9515 | 0.3468 | 0.8972 | 0.0286 |
| 13955 | 2081.6816 | 0.2996 | 0.8977 | 0.0287 |
| 10758 | 2081.6983 | 0.3435 | 0.8963 | 0.0287 |
| 7022  | 2086.2352 | 0.3363 | 0.8997 | 0.0288 |
| 11333 | 2088.535  | 0.2968 | 0.9007 | 0.0289 |
| 18530 | 2089.073  | 0.2998 | 0.8999 | 0.0289 |
| 15273 | 2092.1248 | 0.2992 | 0.9016 | 0.029  |
| 19290 | 2092.3897 | 0.2991 | 0.9004 | 0.029  |
| 8526  | 2096.381  | 0.2868 | 0.9028 | 0.0291 |
| 2715  | 2097.7487 | 0.8222 | 0.903  | 0.0292 |
| 8038  | 2098.4749 | 0.3265 | 0.9022 | 0.0292 |
| 17774 | 2099.2614 | 0.2858 | 0.9018 | 0.0292 |
| 3293  | 2099.2987 | 0.3226 | 0.9005 | 0.0292 |
| 3712  | 2099.5028 | 0.3624 | 0.8994 | 0.0292 |
| 1085  | 2099.973  | 0.3514 | 0.8985 | 0.0292 |
| 6654  | 2100.5094 | 0.321  | 0.8976 | 0.0293 |
| 16257 | 2100.9902 | 0.3613 | 0.8969 | 0.0293 |
| 15139 | 2102.5792 | 0.3312 | 0.8969 | 0.0293 |
| 2528  | 2103.8942 | 0.3384 | 0.8971 | 0.0294 |
| 4745  | 2106.1572 | 0.3964 | 0.8981 | 0.0295 |
| 8588  | 2107.0994 | 0.3001 | 0.8975 | 0.0295 |
| 19185 | 2108.4181 | 0.2918 | 0.8975 | 0.0295 |
| 6249  | 2115.111  | 0.3176 | 0.9028 | 0.0297 |
| 20032 | 2118.2728 | 0.3442 | 0.9045 | 0.0298 |
| 18937 | 2119.1142 | 0.3079 | 0.9039 | 0.0299 |

|       |           |        |        |        |
|-------|-----------|--------|--------|--------|
| 16981 | 2122.7679 | 0.2978 | 0.9063 | 0.03   |
| 17594 | 2124.2085 | 0.3147 | 0.9063 | 0.03   |
| 6831  | 2126.1226 | 0.3095 | 0.9069 | 0.0301 |
| 12494 | 2126.1816 | 0.3414 | 0.9056 | 0.0301 |
| 8672  | 2126.925  | 0.5528 | 0.9051 | 0.0301 |
| 3521  | 2127.2838 | 0.3413 | 0.9041 | 0.0301 |
| 15244 | 2127.3401 | 0.3072 | 0.9028 | 0.0301 |
| 18477 | 2128.3193 | 0.3015 | 0.9024 | 0.0302 |
| 5711  | 2131.4853 | 0.5294 | 0.9039 | 0.0303 |
| 5003  | 2132.3152 | 0.6198 | 0.9033 | 0.0303 |
| 3976  | 2132.7857 | 0.2956 | 0.9025 | 0.0303 |
| 20286 | 2135.1598 | 0.2871 | 0.9035 | 0.0304 |
| 14305 | 2137.2082 | 0.3767 | 0.9044 | 0.0305 |
| 17554 | 2137.7237 | 0.3997 | 0.9037 | 0.0305 |
| 1125  | 2138.4014 | 0.3417 | 0.9033 | 0.0305 |
| 5951  | 2138.8328 | 0.2859 | 0.9024 | 0.0305 |
| 3684  | 2140.7876 | 0.3197 | 0.9035 | 0.0306 |
| 11391 | 2141.8359 | 0.326  | 0.9034 | 0.0306 |
| 9016  | 2145.0742 | 0.3371 | 0.9054 | 0.0308 |
| 20406 | 2145.2301 | 0.3112 | 0.9042 | 0.0308 |
| 15094 | 2146.1406 | 0.3277 | 0.9037 | 0.0308 |
| 4418  | 2147.3442 | 0.3001 | 0.9037 | 0.0308 |
| 7329  | 2147.7091 | 0.3108 | 0.9027 | 0.0308 |
| 16165 | 2149.1291 | 0.3084 | 0.9028 | 0.0309 |
| 11154 | 2152.6112 | 0.357  | 0.9049 | 0.031  |
| 3023  | 2158.4966 | 0.3143 | 0.9094 | 0.0312 |
| 267   | 2158.7116 | 0.3146 | 0.9083 | 0.0312 |
| 4702  | 2159.1133 | 0.291  | 0.9075 | 0.0312 |
| 12431 | 2162.6811 | 0.4013 | 0.9097 | 0.0313 |
| 3640  | 2163.7482 | 0.2944 | 0.9094 | 0.0314 |
| 15133 | 2163.9514 | 0.2959 | 0.9083 | 0.0314 |
| 3899  | 2166.0225 | 0.3694 | 0.9092 | 0.0315 |
| 12405 | 2170.8694 | 0.3359 | 0.9126 | 0.0316 |
| 629   | 2172.0814 | 0.3203 | 0.9124 | 0.0317 |

|       |           |        |        |        |
|-------|-----------|--------|--------|--------|
| 2987  | 2173.8678 | 0.3644 | 0.913  | 0.0317 |
| 11635 | 2176.532  | 0.3375 | 0.9144 | 0.0318 |
| 11968 | 2177.4328 | 0.2954 | 0.9141 | 0.0319 |
| 2552  | 2178.1096 | 0.5721 | 0.9135 | 0.0319 |
| 3402  | 2178.9005 | 0.3506 | 0.9132 | 0.0319 |
| 11739 | 2179.6509 | 0.2917 | 0.9127 | 0.0319 |
| 18111 | 2180.2928 | 0.3013 | 0.9119 | 0.032  |
| 5270  | 2181.2334 | 0.5292 | 0.9114 | 0.032  |
| 8249  | 2181.5638 | 0.2937 | 0.9105 | 0.032  |
| 2221  | 2182.1415 | 0.3016 | 0.9098 | 0.032  |
| 11354 | 2183.7281 | 0.2883 | 0.9101 | 0.0321 |
| 15382 | 2184.8062 | 0.3172 | 0.9101 | 0.0321 |
| 20364 | 2185.1965 | 0.3166 | 0.9092 | 0.0321 |
| 14179 | 2187.8095 | 0.2948 | 0.9105 | 0.0322 |
| 8861  | 2190.5225 | 0.2998 | 0.9119 | 0.0323 |
| 2697  | 2191.6423 | 0.5198 | 0.912  | 0.0324 |
| 8780  | 2192.3378 | 0.3084 | 0.9114 | 0.0324 |
| 8608  | 2192.8115 | 0.575  | 0.9105 | 0.0324 |
| 15270 | 2195.1041 | 0.6464 | 0.9116 | 0.0325 |
| 3256  | 2195.5974 | 0.3074 | 0.9109 | 0.0325 |
| 8385  | 2195.7907 | 0.4573 | 0.9099 | 0.0325 |
| 5463  | 2197.3379 | 0.3103 | 0.9102 | 0.0326 |
| 15618 | 2198.0573 | 0.4728 | 0.9097 | 0.0326 |
| 11706 | 2202.7109 | 0.3058 | 0.9128 | 0.0327 |
| 14561 | 2202.8584 | 0.3138 | 0.9117 | 0.0328 |
| 13522 | 2203.3011 | 0.297  | 0.9108 | 0.0328 |
| 17134 | 2205.4467 | 0.49   | 0.9117 | 0.0328 |
| 9221  | 2207.9215 | 0.308  | 0.9132 | 0.0329 |
| 3306  | 2209.9196 | 0.3084 | 0.9139 | 0.033  |
| 19830 | 2211.2458 | 0.3852 | 0.9139 | 0.0331 |
| 4104  | 2213.2718 | 0.3773 | 0.9147 | 0.0331 |
| 17553 | 2217.3192 | 0.3638 | 0.9174 | 0.0333 |
| 7072  | 2218.7266 | 0.3451 | 0.9173 | 0.0333 |
| 19902 | 2219.9855 | 0.3013 | 0.9175 | 0.0334 |



|       |           |        |        |        |
|-------|-----------|--------|--------|--------|
| 1833  | 2220.522  | 0.3072 | 0.9168 | 0.0334 |
| 15993 | 2222.0637 | 0.2941 | 0.9172 | 0.0334 |
| 14488 | 2224.1815 | 0.3347 | 0.918  | 0.0335 |
| 3556  | 2225.5859 | 0.3308 | 0.9182 | 0.0336 |
| 19349 | 2227.2436 | 0.3121 | 0.9186 | 0.0336 |
| 4278  | 2228.3692 | 0.8604 | 0.9185 | 0.0337 |
| 15289 | 2228.8484 | 0.377  | 0.9176 | 0.0337 |
| 10921 | 2229.5088 | 0.3461 | 0.9169 | 0.0337 |
| 11948 | 2229.7791 | 0.4569 | 0.9158 | 0.0337 |
| 4566  | 2230.3442 | 0.3531 | 0.9151 | 0.0337 |
| 16478 | 2230.5381 | 0.3321 | 0.9141 | 0.0337 |
| 15556 | 2230.8383 | 0.3411 | 0.9132 | 0.0337 |
| 14144 | 2231.8224 | 0.3098 | 0.913  | 0.0338 |
| 3184  | 2232.5996 | 0.3099 | 0.9125 | 0.0338 |
| 13532 | 2232.7434 | 0.3448 | 0.9114 | 0.0338 |
| 17286 | 2233.4106 | 0.4375 | 0.9109 | 0.0338 |
| 5915  | 2235.5591 | 0.3769 | 0.9117 | 0.0339 |
| 4128  | 2236.7562 | 0.4475 | 0.9115 | 0.0339 |
| 1701  | 2237.2822 | 0.4545 | 0.911  | 0.034  |
| 12820 | 2238.3595 | 0.3127 | 0.9107 | 0.034  |
| 4637  | 2239.4096 | 0.3235 | 0.9102 | 0.034  |
| 12481 | 2239.5192 | 0.302  | 0.9092 | 0.034  |
| 17139 | 2239.534  | 0.4984 | 0.908  | 0.034  |
| 5866  | 2239.6858 | 0.3012 | 0.9069 | 0.034  |
| 3261  | 2240.6849 | 0.4731 | 0.9068 | 0.0341 |
| 2425  | 2241.4793 | 0.3162 | 0.9064 | 0.0341 |
| 19502 | 2243.1581 | 0.3349 | 0.9068 | 0.0342 |
| 10825 | 2246.0509 | 0.3002 | 0.9083 | 0.0343 |
| 18864 | 2250.4204 | 0.3111 | 0.9116 | 0.0344 |
| 8570  | 2253.253  | 0.4409 | 0.913  | 0.0345 |
| 17741 | 2253.4778 | 0.3112 | 0.9121 | 0.0345 |
| 3648  | 2253.9128 | 0.3537 | 0.9114 | 0.0346 |
| 14722 | 2254.8993 | 0.2979 | 0.9112 | 0.0346 |
| 10292 | 2255.2819 | 0.4919 | 0.9104 | 0.0346 |

|       |           |        |        |        |
|-------|-----------|--------|--------|--------|
| 9271  | 2257.0057 | 0.3239 | 0.9106 | 0.0347 |
| 4689  | 2260.1253 | 0.3289 | 0.9124 | 0.0348 |
| 10359 | 2261.2399 | 0.3378 | 0.9122 | 0.0348 |
| 4718  | 2262.1286 | 0.3017 | 0.9119 | 0.0349 |
| 2368  | 2263.3019 | 0.3297 | 0.912  | 0.0349 |
| 7299  | 2263.6605 | 0.3497 | 0.9113 | 0.0349 |
| 15252 | 2264.0212 | 0.3252 | 0.9105 | 0.0349 |
| 16216 | 2264.0755 | 0.547  | 0.9095 | 0.0349 |
| 6834  | 2265.7073 | 0.3423 | 0.9098 | 0.035  |
| 3173  | 2265.9938 | 0.3323 | 0.9088 | 0.035  |
| 7168  | 2266.1353 | 0.3433 | 0.9078 | 0.035  |
| 4495  | 2266.4325 | 0.3461 | 0.9071 | 0.035  |
| 5620  | 2267.4029 | 0.3252 | 0.9069 | 0.0351 |
| 10606 | 2275.1633 | 0.3274 | 0.9132 | 0.0353 |
| 12689 | 2278.8704 | 0.3084 | 0.9161 | 0.0355 |
| 14834 | 2278.9104 | 0.3131 | 0.9149 | 0.0355 |
| 9301  | 2279.3294 | 0.3305 | 0.9142 | 0.0355 |
| 16479 | 2280.1672 | 0.3402 | 0.9139 | 0.0356 |
| 2251  | 2280.5129 | 0.3124 | 0.913  | 0.0356 |
| 5896  | 2281.0025 | 0.3373 | 0.9124 | 0.0356 |
| 13501 | 2281.5596 | 0.343  | 0.9117 | 0.0356 |
| 18534 | 2282.0338 | 0.4427 | 0.911  | 0.0356 |
| 8555  | 2284.0701 | 0.5194 | 0.9118 | 0.0357 |
| 355   | 2284.0732 | 0.3166 | 0.9106 | 0.0357 |
| 8751  | 2286.6978 | 0.3166 | 0.9124 | 0.0358 |
| 10042 | 2292.7291 | 0.3924 | 0.9173 | 0.036  |
| 3848  | 2294.4322 | 0.473  | 0.9178 | 0.0361 |
| 16267 | 2294.8292 | 0.3812 | 0.9171 | 0.0361 |
| 4215  | 2295.1246 | 0.3299 | 0.9163 | 0.0361 |
| 12206 | 2295.7394 | 0.361  | 0.9158 | 0.0362 |
| 5765  | 2295.8664 | 0.3137 | 0.9148 | 0.0362 |
| 18311 | 2298.3671 | 0.5234 | 0.9159 | 0.0363 |
| 3410  | 2298.906  | 0.3514 | 0.9153 | 0.0363 |
| 19028 | 2300.4157 | 0.4711 | 0.9157 | 0.0363 |

|       |           |        |        |        |
|-------|-----------|--------|--------|--------|
| 20400 | 2302.4603 | 0.3973 | 0.9167 | 0.0364 |
| 6786  | 2307.7137 | 0.3093 | 0.9206 | 0.0366 |
| 9457  | 2308.5889 | 0.3452 | 0.9202 | 0.0367 |
| 10101 | 2309.6707 | 0.3112 | 0.9202 | 0.0367 |
| 16067 | 2310.2732 | 0.336  | 0.9195 | 0.0367 |
| 15788 | 2310.4887 | 0.3162 | 0.9187 | 0.0367 |
| 4918  | 2313.7324 | 0.4231 | 0.9205 | 0.0368 |
| 15629 | 2314.434  | 0.353  | 0.9201 | 0.0369 |
| 16210 | 2315.8082 | 0.3596 | 0.9201 | 0.0369 |
| 12103 | 2318.6432 | 0.34   | 0.9216 | 0.037  |
| 19479 | 2320.8339 | 0.3118 | 0.9223 | 0.0371 |
| 18874 | 2321.4103 | 0.3188 | 0.9218 | 0.0371 |
| 5782  | 2322.0699 | 0.3206 | 0.9213 | 0.0372 |
| 5373  | 2322.9139 | 0.3191 | 0.921  | 0.0372 |
| 12008 | 2323.0257 | 0.4675 | 0.92   | 0.0372 |
| 17205 | 2325.0337 | 0.3234 | 0.9208 | 0.0373 |
| 17465 | 2326.9874 | 0.3118 | 0.9216 | 0.0373 |
| 11387 | 2327.4576 | 0.3516 | 0.9209 | 0.0374 |
| 3171  | 2328.53   | 0.3621 | 0.9209 | 0.0374 |
| 15533 | 2334.3071 | 0.317  | 0.9251 | 0.0376 |
| 7138  | 2336.9332 | 0.4132 | 0.9264 | 0.0377 |
| 13690 | 2340.5464 | 0.3974 | 0.929  | 0.0379 |
| 4654  | 2340.701  | 0.5988 | 0.928  | 0.0379 |
| 17531 | 2342.971  | 0.3172 | 0.9292 | 0.038  |
| 14893 | 2344.8402 | 0.3272 | 0.9297 | 0.038  |
| 13926 | 2347.7638 | 0.3929 | 0.9313 | 0.0381 |
| 17111 | 2348.474  | 0.3468 | 0.9308 | 0.0382 |
| 2760  | 2349.5656 | 0.4522 | 0.9307 | 0.0382 |
| 11137 | 2349.5704 | 0.3278 | 0.9296 | 0.0382 |
| 7274  | 2349.5835 | 0.3474 | 0.9285 | 0.0382 |
| 11413 | 2350.3138 | 0.3193 | 0.928  | 0.0382 |
| 12712 | 2352.1724 | 0.3638 | 0.9286 | 0.0383 |
| 399   | 2352.7847 | 0.3306 | 0.928  | 0.0383 |
| 4532  | 2354.3858 | 0.4044 | 0.9285 | 0.0384 |

|       |           |        |        |        |
|-------|-----------|--------|--------|--------|
| 10238 | 2358.3768 | 0.3164 | 0.9311 | 0.0385 |
| 14782 | 2361.4235 | 0.353  | 0.9328 | 0.0387 |
| 2060  | 2362.6099 | 0.3381 | 0.9328 | 0.0387 |
| 10100 | 2363.1119 | 0.3869 | 0.9322 | 0.0387 |
| 10826 | 2365.0063 | 0.3479 | 0.9332 | 0.0388 |
| 10686 | 2365.1809 | 0.3465 | 0.9323 | 0.0388 |
| 3127  | 2365.6394 | 0.3554 | 0.9317 | 0.0388 |
| 11394 | 2365.991  | 0.4122 | 0.9309 | 0.0389 |
| 1350  | 2366.9798 | 0.3215 | 0.9307 | 0.0389 |
| 5196  | 2367.3185 | 0.3926 | 0.9299 | 0.0389 |
| 2902  | 2370.6047 | 0.446  | 0.9318 | 0.039  |
| 17432 | 2371.6741 | 0.3158 | 0.9317 | 0.0391 |
| 13598 | 2372.3501 | 0.3475 | 0.9312 | 0.0391 |
| 7076  | 2376.722  | 0.5867 | 0.9344 | 0.0393 |
| 7116  | 2377.1061 | 0.4028 | 0.9336 | 0.0393 |
| 658   | 2379.2561 | 0.3416 | 0.9347 | 0.0394 |
| 10071 | 2383.3668 | 0.3341 | 0.9377 | 0.0396 |
| 19126 | 2385.233  | 0.3619 | 0.9385 | 0.0396 |
| 1595  | 2386.3751 | 0.381  | 0.9385 | 0.0397 |
| 7421  | 2387.4457 | 0.3445 | 0.9386 | 0.0397 |
| 4720  | 2388.3734 | 0.3207 | 0.9383 | 0.0398 |
| 14726 | 2389.9037 | 0.401  | 0.9386 | 0.0398 |
| 14673 | 2390.0047 | 0.4661 | 0.9376 | 0.0398 |
| 11591 | 2390.8329 | 0.3823 | 0.9373 | 0.0399 |
| 15338 | 2391.4499 | 0.3483 | 0.9368 | 0.0399 |
| 9692  | 2391.7706 | 0.5124 | 0.936  | 0.0399 |
| 4330  | 2392.3318 | 0.3464 | 0.9355 | 0.0399 |
| 3457  | 2392.8483 | 0.4946 | 0.935  | 0.0399 |
| 1506  | 2394.3673 | 0.3244 | 0.9353 | 0.04   |
| 15193 | 2395.4228 | 0.3199 | 0.9351 | 0.04   |
| 20277 | 2397.3084 | 0.3426 | 0.9357 | 0.0401 |
| 11256 | 2402.2709 | 0.551  | 0.9395 | 0.0403 |
| 11135 | 2402.7538 | 0.3402 | 0.9388 | 0.0403 |
| 16945 | 2403.4805 | 0.4236 | 0.9383 | 0.0404 |

|       |           |        |        |        |
|-------|-----------|--------|--------|--------|
| 4556  | 2407.9439 | 0.4284 | 0.9417 | 0.0405 |
| 14327 | 2408.3108 | 0.3261 | 0.9409 | 0.0406 |
| 17574 | 2409.6861 | 0.3162 | 0.9411 | 0.0406 |
| 19687 | 2413.9911 | 0.3617 | 0.9439 | 0.0408 |
| 7585  | 2414.8604 | 0.4086 | 0.9436 | 0.0408 |
| 15116 | 2416.1292 | 0.3216 | 0.9435 | 0.0409 |
| 17711 | 2416.552  | 0.314  | 0.9428 | 0.0409 |
| 2448  | 2417.1851 | 0.4173 | 0.9424 | 0.0409 |
| 18608 | 2417.6065 | 0.4173 | 0.9418 | 0.0409 |
| 12288 | 2418.1583 | 0.3712 | 0.9412 | 0.0409 |
| 6867  | 2419.5984 | 0.3252 | 0.9415 | 0.041  |
| 19859 | 2420.0741 | 0.3329 | 0.9408 | 0.041  |
| 8574  | 2420.444  | 0.3938 | 0.9402 | 0.041  |
| 7395  | 2422.564  | 0.3288 | 0.9415 | 0.0411 |
| 3123  | 2425.2504 | 0.328  | 0.9429 | 0.0412 |
| 13337 | 2427.8395 | 0.401  | 0.9444 | 0.0414 |
| 14395 | 2427.948  | 0.3617 | 0.9435 | 0.0414 |
| 10980 | 2428.9894 | 0.3718 | 0.9433 | 0.0414 |
| 13702 | 2429.5586 | 0.3263 | 0.9427 | 0.0414 |
| 4429  | 2433.2773 | 0.3457 | 0.9451 | 0.0416 |
| 3909  | 2434.1355 | 0.33   | 0.9447 | 0.0416 |
| 8742  | 2435.1166 | 0.4141 | 0.9447 | 0.0416 |
| 4286  | 2438.5568 | 0.3304 | 0.9466 | 0.0418 |
| 17180 | 2439.8708 | 0.6494 | 0.9466 | 0.0418 |
| 4898  | 2442.8723 | 0.6341 | 0.9483 | 0.0419 |
| 2326  | 2443.293  | 0.3332 | 0.9476 | 0.042  |
| 18654 | 2443.6174 | 0.331  | 0.9469 | 0.042  |
| 17377 | 2443.7415 | 0.3268 | 0.9459 | 0.042  |
| 9534  | 2447.4992 | 0.3525 | 0.9486 | 0.0421 |
| 13378 | 2448.0943 | 0.4436 | 0.9482 | 0.0422 |
| 17585 | 2448.3252 | 0.4772 | 0.9473 | 0.0422 |
| 18332 | 2448.7563 | 0.3809 | 0.9467 | 0.0422 |
| 14077 | 2451.2498 | 0.3627 | 0.9479 | 0.0423 |
| 9397  | 2451.7567 | 0.3332 | 0.9475 | 0.0423 |

|       |           |        |        |        |
|-------|-----------|--------|--------|--------|
| 18052 | 2452.4716 | 0.6068 | 0.9471 | 0.0424 |
| 3974  | 2453.5912 | 0.4536 | 0.9472 | 0.0424 |
| 5484  | 2453.735  | 0.3494 | 0.9463 | 0.0424 |
| 13853 | 2456.6319 | 0.5449 | 0.948  | 0.0425 |
| 16649 | 2458.8707 | 0.3482 | 0.9491 | 0.0426 |
| 15938 | 2459.3094 | 0.3501 | 0.9484 | 0.0426 |
| 13772 | 2459.9397 | 0.3824 | 0.948  | 0.0427 |
| 11027 | 2460.118  | 0.3253 | 0.9471 | 0.0427 |
| 15019 | 2461.5308 | 0.3862 | 0.9475 | 0.0427 |
| 10127 | 2461.5834 | 0.3246 | 0.9466 | 0.0427 |
| 6883  | 2462.313  | 0.9941 | 0.9462 | 0.0428 |
| 18115 | 2462.4853 | 0.339  | 0.9454 | 0.0428 |
| 951   | 2463.5512 | 0.3433 | 0.9454 | 0.0428 |
| 8748  | 2464.0515 | 0.401  | 0.9448 | 0.0429 |
| 10885 | 2464.1345 | 0.3244 | 0.9439 | 0.0429 |
| 16555 | 2464.5568 | 0.5617 | 0.9432 | 0.0429 |
| 10232 | 2466.9611 | 0.3322 | 0.9444 | 0.043  |
| 3516  | 2470.8045 | 0.3676 | 0.9465 | 0.0431 |
| 16473 | 2470.8862 | 0.3238 | 0.9455 | 0.0431 |
| 17659 | 2471.4923 | 0.4019 | 0.9451 | 0.0431 |
| 18528 | 2471.7377 | 0.3482 | 0.9442 | 0.0431 |
| 20002 | 2472.9775 | 0.3329 | 0.9442 | 0.0432 |
| 16222 | 2474.1855 | 0.3295 | 0.9442 | 0.0432 |
| 5626  | 2476.4322 | 0.3926 | 0.9451 | 0.0433 |
| 5651  | 2477.1969 | 0.4747 | 0.945  | 0.0434 |
| 16061 | 2477.9867 | 0.4512 | 0.9447 | 0.0434 |
| 3732  | 2478.4745 | 0.3495 | 0.9441 | 0.0434 |
| 14439 | 2480.4372 | 0.3497 | 0.9452 | 0.0435 |
| 20299 | 2482.1654 | 0.3756 | 0.9459 | 0.0436 |
| 18431 | 2482.653  | 0.3217 | 0.9452 | 0.0436 |
| 15870 | 2483.4241 | 0.4708 | 0.9449 | 0.0436 |
| 2836  | 2483.9974 | 0.4551 | 0.9444 | 0.0437 |
| 10002 | 2485.1017 | 0.3984 | 0.9444 | 0.0437 |
| 8415  | 2485.158  | 0.3287 | 0.9435 | 0.0437 |

|       |           |        |        |        |
|-------|-----------|--------|--------|--------|
| 14723 | 2485.4761 | 0.6564 | 0.9428 | 0.0437 |
| 19400 | 2487.3939 | 0.4051 | 0.9435 | 0.0438 |
| 8791  | 2488.5599 | 0.3753 | 0.9436 | 0.0439 |
| 13887 | 2488.9026 | 0.3509 | 0.9429 | 0.0439 |
| 18421 | 2491.4074 | 0.5338 | 0.9443 | 0.044  |
| 10023 | 2491.6085 | 0.3519 | 0.9435 | 0.044  |
| 17323 | 2493.4984 | 0.4714 | 0.9442 | 0.0441 |
| 13502 | 2493.5149 | 0.5852 | 0.9432 | 0.0441 |
| 18294 | 2494.4245 | 0.4106 | 0.943  | 0.0441 |
| 9188  | 2494.8592 | 0.8504 | 0.9423 | 0.0441 |
| 8910  | 2495.1903 | 0.3437 | 0.9416 | 0.0441 |
| 16018 | 2495.6343 | 0.3617 | 0.941  | 0.0442 |
| 11745 | 2496.1636 | 0.3435 | 0.9405 | 0.0442 |
| 18345 | 2498.6932 | 0.3262 | 0.9418 | 0.0443 |
| 5316  | 2499.2323 | 0.3471 | 0.9413 | 0.0443 |
| 17542 | 2501.8521 | 0.4956 | 0.9427 | 0.0444 |
| 18920 | 2502.0163 | 0.3286 | 0.9419 | 0.0444 |
| 11107 | 2502.3504 | 0.3331 | 0.9413 | 0.0444 |
| 15059 | 2502.4895 | 0.3493 | 0.9405 | 0.0444 |
| 18544 | 2503.6365 | 0.4655 | 0.9405 | 0.0445 |
| 14794 | 2504.051  | 0.4366 | 0.9399 | 0.0445 |
| 12228 | 2504.2837 | 0.4297 | 0.9391 | 0.0445 |
| 5816  | 2504.6206 | 0.3927 | 0.9383 | 0.0445 |
| 1420  | 2507.6385 | 0.643  | 0.9398 | 0.0446 |
| 3772  | 2508.064  | 0.4942 | 0.9392 | 0.0447 |
| 18641 | 2510.4893 | 0.3636 | 0.9402 | 0.0448 |
| 19702 | 2512.3727 | 0.3828 | 0.9411 | 0.0448 |
| 13272 | 2512.8644 | 0.4246 | 0.9406 | 0.0449 |
| 19917 | 2513.4033 | 0.4694 | 0.9402 | 0.0449 |
| 11299 | 2515.1816 | 0.3431 | 0.9408 | 0.045  |
| 16355 | 2515.4801 | 0.3511 | 0.9401 | 0.045  |
| 3494  | 2516.7254 | 0.4257 | 0.9401 | 0.045  |
| 16865 | 2517.6154 | 0.3417 | 0.9399 | 0.0451 |
| 4065  | 2517.7974 | 0.4385 | 0.9391 | 0.0451 |

|       |           |        |        |        |
|-------|-----------|--------|--------|--------|
| 12841 | 2517.8247 | 0.3507 | 0.9382 | 0.0451 |
| 5034  | 2518.5293 | 0.4166 | 0.9379 | 0.0451 |
| 1992  | 2520.2544 | 0.3555 | 0.9385 | 0.0452 |
| 4351  | 2520.6761 | 0.4033 | 0.9378 | 0.0452 |
| 8659  | 2521.0661 | 0.4565 | 0.9372 | 0.0452 |
| 14374 | 2522.9002 | 0.5544 | 0.938  | 0.0453 |
| 1682  | 2523.5221 | 2.2586 | 0.9376 | 0.0453 |
| 13285 | 2525.0157 | 0.4926 | 0.9381 | 0.0454 |
| 6672  | 2525.3478 | 0.3454 | 0.9374 | 0.0454 |
| 3707  | 2525.4475 | 0.3969 | 0.9367 | 0.0454 |
| 12045 | 2526.9782 | 0.5574 | 0.9371 | 0.0455 |
| 17776 | 2526.9896 | 0.3279 | 0.9362 | 0.0455 |
| 2427  | 2527.606  | 0.4043 | 0.9357 | 0.0455 |
| 15506 | 2528.4322 | 0.4314 | 0.9356 | 0.0455 |
| 18518 | 2531.1224 | 0.3399 | 0.937  | 0.0457 |
| 15916 | 2537.0431 | 0.3825 | 0.9409 | 0.0459 |
| 6325  | 2538.9601 | 0.3813 | 0.9414 | 0.046  |
| 13761 | 2541.7541 | 0.3667 | 0.943  | 0.0461 |
| 19166 | 2544.0733 | 0.4034 | 0.9443 | 0.0462 |
| 2212  | 2544.8649 | 0.3704 | 0.9441 | 0.0462 |
| 14490 | 2545.5311 | 0.3368 | 0.9437 | 0.0463 |
| 2582  | 2546.6045 | 0.3562 | 0.9437 | 0.0463 |
| 10771 | 2547.4257 | 0.5575 | 0.9434 | 0.0463 |
| 18917 | 2547.6001 | 0.5687 | 0.9426 | 0.0463 |
| 3866  | 2547.9239 | 0.6391 | 0.9419 | 0.0464 |
| 17707 | 2548.3618 | 0.4045 | 0.9414 | 0.0464 |
| 13889 | 2551.6685 | 0.3479 | 0.943  | 0.0465 |
| 4132  | 2552.0333 | 0.3324 | 0.9422 | 0.0465 |
| 18570 | 2552.8813 | 0.702  | 0.9421 | 0.0466 |
| 17676 | 2554.2118 | 0.4225 | 0.9423 | 0.0466 |
| 4461  | 2555.1908 | 0.326  | 0.9422 | 0.0467 |
| 3471  | 2556.8949 | 0.3609 | 0.9427 | 0.0467 |
| 7934  | 2557.0029 | 0.3691 | 0.9418 | 0.0467 |
| 7603  | 2557.064  | 0.3361 | 0.9409 | 0.0467 |



|       |           |        |        |        |
|-------|-----------|--------|--------|--------|
| 2823  | 2558.0901 | 0.5757 | 0.9407 | 0.0468 |
| 1199  | 2558.6431 | 0.3649 | 0.9403 | 0.0468 |
| 15329 | 2559.0873 | 0.3576 | 0.9397 | 0.0468 |
| 6447  | 2559.4598 | 0.36   | 0.939  | 0.0468 |
| 10334 | 2561.207  | 0.4212 | 0.9396 | 0.0469 |
| 19775 | 2563.6544 | 0.3411 | 0.9407 | 0.047  |
| 15253 | 2564.2205 | 0.3375 | 0.9402 | 0.047  |
| 14579 | 2564.3222 | 0.3425 | 0.9393 | 0.047  |
| 3083  | 2566.5932 | 0.3833 | 0.9405 | 0.0471 |
| 14870 | 2567.3109 | 0.3569 | 0.9402 | 0.0471 |
| 3898  | 2567.5529 | 0.3664 | 0.9394 | 0.0472 |
| 4027  | 2569.724  | 0.3426 | 0.9406 | 0.0473 |
| 17989 | 2571.7845 | 0.3515 | 0.9417 | 0.0474 |
| 17618 | 2573.3784 | 0.3819 | 0.9421 | 0.0474 |
| 3695  | 2575.9952 | 0.388  | 0.9436 | 0.0476 |
| 9202  | 2576.2545 | 0.3353 | 0.943  | 0.0476 |
| 20136 | 2577.2575 | 0.3502 | 0.9428 | 0.0476 |
| 17282 | 2577.6405 | 0.3577 | 0.9423 | 0.0476 |
| 4188  | 2578.3253 | 0.3584 | 0.942  | 0.0477 |
| 8649  | 2578.8978 | 0.3458 | 0.9415 | 0.0477 |
| 9228  | 2578.9885 | 0.344  | 0.9407 | 0.0477 |
| 122   | 2579.4514 | 0.3531 | 0.9402 | 0.0477 |
| 19653 | 2579.7038 | 0.401  | 0.9395 | 0.0477 |
| 19100 | 2582.6393 | 0.3842 | 0.9411 | 0.0478 |
| 8568  | 2583.012  | 0.3379 | 0.9405 | 0.0479 |
| 4444  | 2584.609  | 0.4528 | 0.9409 | 0.0479 |
| 17404 | 2584.6171 | 0.3942 | 0.94   | 0.0479 |
| 8293  | 2586.9315 | 0.3894 | 0.9409 | 0.048  |
| 4023  | 2590.5165 | 0.3446 | 0.943  | 0.0482 |
| 3098  | 2591.9928 | 0.3517 | 0.9433 | 0.0482 |
| 51    | 2592.1093 | 0.429  | 0.9425 | 0.0482 |
| 20177 | 2592.9233 | 0.7358 | 0.9422 | 0.0483 |
| 11056 | 2594.2164 | 0.3468 | 0.9425 | 0.0483 |
| 15865 | 2596.4817 | 0.4138 | 0.9436 | 0.0484 |

|       |           |        |        |        |
|-------|-----------|--------|--------|--------|
| 11004 | 2596.5014 | 0.4724 | 0.9427 | 0.0484 |
| 10868 | 2597.9575 | 0.3453 | 0.9431 | 0.0485 |
| 3573  | 2598.4262 | 0.4915 | 0.9425 | 0.0485 |
| 4400  | 2598.4715 | 0.3455 | 0.9416 | 0.0485 |
| 7366  | 2598.5878 | 0.3496 | 0.9409 | 0.0485 |
| 17877 | 2598.7614 | 0.3873 | 0.9401 | 0.0485 |
| 15167 | 2599.5098 | 0.3419 | 0.9396 | 0.0485 |
| 16531 | 2600.3486 | 0.4241 | 0.9395 | 0.0486 |
| 10725 | 2600.5116 | 0.3633 | 0.9387 | 0.0486 |
| 6478  | 2600.8527 | 0.3474 | 0.9381 | 0.0486 |
| 7890  | 2602.9717 | 0.7398 | 0.939  | 0.0487 |
| 5527  | 2605.3285 | 0.3684 | 0.9402 | 0.0488 |
| 10389 | 2606.2623 | 0.3787 | 0.9402 | 0.0488 |
| 15204 | 2607.5091 | 0.5205 | 0.9401 | 0.0489 |
| 10058 | 2609.0487 | 0.3586 | 0.9405 | 0.049  |
| 4674  | 2615.6608 | 0.3647 | 0.9449 | 0.0492 |
| 16308 | 2618.5415 | 0.3473 | 0.9463 | 0.0494 |
| 12808 | 2619.8144 | 0.349  | 0.9463 | 0.0494 |
| 19005 | 2620.5497 | 0.4333 | 0.946  | 0.0494 |
| 17315 | 2620.6648 | 0.4375 | 0.9453 | 0.0494 |
| 15315 | 2621.2253 | 0.3981 | 0.9449 | 0.0495 |
| 19990 | 2621.4125 | 0.3734 | 0.9441 | 0.0495 |
| 3804  | 2625.1182 | 0.3709 | 0.9465 | 0.0496 |
| 5994  | 2626.3383 | 0.3761 | 0.9467 | 0.0497 |
| 7640  | 2629.233  | 0.4373 | 0.9482 | 0.0498 |
| 17917 | 2630.5371 | 0.5176 | 0.9483 | 0.0499 |
| 14580 | 2632.1399 | 0.3363 | 0.949  | 0.05   |

## RMA normalized - Tb up regulated genes

| Gene symbol  | Description      | Probe set    | Geometric mean of inte | Parametric p-value |
|--------------|------------------|--------------|------------------------|--------------------|
| Lum          | lumican          | 1423607_at   | 5                      | 5.70E-06           |
| Kif5b        | kinesin family   | 1418429_at   | 3.3                    | 1.55E-05           |
| 2310047C04R  | RIKEN cDNA 2     | 1454878_at   | 2.5                    | 2.58E-05           |
| Ptprd        | protein tyrosin  | 1429052_at   | 3.3                    | 2.98E-05           |
| Kif18a       | kinesin family   | 1424107_at   | 3.3                    | 3.09E-05           |
| Mlstd2       | male sterility c | 1426371_at   | 2.5                    | 3.29E-05           |
| Tnfsf11      | tumor necrosi    | 1419083_at   | 3.3                    | 3.45E-05           |
| Igfbp5       | insulin-like grc | 1452114_s_at | 5                      | 3.50E-05           |
| Apeg1        | aortic preferer  | 1448664_a_at | 3.3                    | 3.85E-05           |
| D9Wsu20e     | DNA segment,     | 1416447_at   | 2.5                    | 4.30E-05           |
| Prg4         | proteoglycan c   | 1449824_at   | 2.5                    | 4.50E-05           |
| Lox          | lysyl oxidase    | 1416121_at   | 3.3                    | 4.50E-05           |
| Etoh1        | ethanol induce   | 1429712_at   | 2.5                    | 4.81E-05           |
| Rif1         | Rap1 interacti   | 1429491_s_at | 2.5                    | 5.27E-05           |
| B630005N14R  | RIKEN cDNA B     | 1434352_at   | 2.5                    | 5.66E-05           |
| Ibsp         | integrin bindin  | 1417485_at   | 10                     | 6.12E-05           |
| 0610016J10Ri | RIKEN cDNA 0     | 1420339_at   | 2.5                    | 7.34E-05           |
| Kif5b        | kinesin family   | 1418428_at   | 2.5                    | 7.67E-05           |
| Sybl1        | synaptobrevin    | 1452007_at   | 2.5                    | 7.78E-05           |
| 2810021G02R  | RIKEN cDNA 2     | 1427349_x_at | 2.5                    | 7.89E-05           |
| Wif1         | Wnt inhibitory   | 1425425_a_at | 5                      | 7.98E-05           |
| Ibsp         | integrin bindin  | 1417484_at   | 47.6                   | 8.92E-05           |
| Ptprd        | Protein tyrosin  | 1435537_at   | 2                      | 8.99E-05           |
| Sp3          | trans-acting tr  | 1431804_a_at | 2.5                    | 9.04E-05           |
| 4930503L19Ri | RIKEN cDNA 4     | 1454701_at   | 2                      | 9.49E-05           |
| Ube1c        | ubiquitin-activ  | 1435164_s_at | 2.5                    | 9.67E-05           |
| 6330411E07Ri | RIKEN cDNA 6     | 1453783_at   | 2.5                    | 9.97E-05           |
| Fusip1       | FUS interactin   | 1423982_at   | 2.5                    | 0.0001071          |
| D830012I24Ri | RIKEN cDNA C     | 1435822_at   | 2.5                    | 0.0001113          |
| Cxadr        | coxsackievirus   | 1453282_at   | 2.5                    | 0.0001124          |
| Cxcl7        | chemokine (C-    | 1418480_at   | 2                      | 0.0001132          |

|              |                 |              |     |           |
|--------------|-----------------|--------------|-----|-----------|
| Suz12        | suppressor of   | 1427253_s_at | 2   | 0.0001164 |
|              |                 | 1429490_at   | 2.5 | 0.0001213 |
| Nol8         | nucleolar prot  | 1452974_at   | 2   | 0.0001232 |
| Rg9mtd1      | RNA (guanine-   | 1424333_at   | 2.5 | 0.0001263 |
| Hells        | helicase, lymp  | 1417541_at   | 2.5 | 0.000128  |
| Ssb          | Sjogren syndr   | 1416422_a_at | 2   | 0.00013   |
| Ube3a        | ubiquitin prote | 1416682_at   | 2.5 | 0.0001306 |
| 6230416J20Ri | RIKEN cDNA 6    | 1455488_at   | 2.5 | 0.0001322 |
| Col4a3bp     | procollagen, t  | 1420384_at   | 2.5 | 0.0001323 |
| Fcho2        | FCH domain o    | 1437200_at   | 2.5 | 0.0001344 |
| 9630042H07R  | RIKEN cDNA 9    | 1427985_at   | 2.5 | 0.0001383 |
|              |                 | 1433600_at   | 2.5 | 0.0001423 |
|              |                 | 1421534_at   | 2   | 0.0001425 |
| Zfp148       | zinc finger pro | 1418381_at   | 2   | 0.0001445 |
| 2610207F23Ri | RIKEN cDNA 2    | 1455608_at   | 2   | 0.0001479 |
| 1110020G09R  | RIKEN cDNA 1    | 1437287_at   | 2   | 0.000148  |
| AW011752     | expressed seq   | 1423198_a_at | 2   | 0.0001492 |
| Rif1         | Rap1 interacti  | 1437179_at   | 2.5 | 0.0001496 |
| Smc6l1       | SMC6 structur   | 1422910_s_at | 2   | 0.0001533 |
| Zbtb11       | Zinc finger an  | 1454826_at   | 2   | 0.0001541 |
| AI315324     | expressed seq   | 1455083_at   | 3.3 | 0.0001541 |
| Gt(ROSA)26Sc | gene trap ROS   | 1452239_at   | 2.5 | 0.0001569 |
| Zfp53        | zinc finger pro | 1449414_at   | 2.5 | 0.0001611 |
| Wdr9         | WD repeat dor   | 1427322_at   | 2   | 0.0001615 |
| A830080D01R  | RIKEN cDNA A    | 1434910_at   | 2   | 0.0001657 |
| Zdhhc20      | zinc finger, DH | 1434236_at   | 2   | 0.0001658 |
| Nr1d2        | nuclear recept  | 1416958_at   | 2.5 | 0.0001682 |
| Smoc2        | SPARC related   | 1415935_at   | 2   | 0.0001687 |
| Kif5b        | kinesin family  | 1418431_at   | 2   | 0.0001689 |
| Fmr1         | fragile X ment  | 1423369_at   | 2   | 0.0001737 |
| 6030408C04R  | RIKEN cDNA 6    | 1434700_at   | 2   | 0.0001742 |
| Usp45        | ubiquitin speci | 1427990_at   | 2.5 | 0.0001753 |
| Pik3ca       | phosphatidylin  | 1429435_x_at | 2   | 0.0001757 |
| Mak3         | Mak3 homolog    | 1428410_at   | 2.5 | 0.0001794 |

|              |                  |              |     |           |
|--------------|------------------|--------------|-----|-----------|
| Ogn          | osteoglycin      | 1419663_at   | 2   | 0.0001871 |
| Pdcl         | phosducin-like   | 1425149_a_at | 2   | 0.0001884 |
| A730024A03R  | RIKEN cDNA A     | 1449668_s_at | 2   | 0.0001889 |
| Fnbp3        | formin binding   | 1420916_at   | 2   | 0.0001925 |
| 2610101J03Ri | RIKEN cDNA 2     | 1453727_at   | 2.5 | 0.0001936 |
| Mlstd2       | male sterility c | 1453550_a_at | 2   | 0.0001946 |
| BC049807     | cDNA sequenc     | 1437696_at   | 2.5 | 0.000197  |
| C330027C09R  | RIKEN cDNA C     | 1449699_s_at | 2.5 | 0.0001973 |
| Smc4l1       | SMC4 structur    | 1427275_at   | 2   | 0.0001978 |
| Tmed7        | transmembrar     | 1419917_s_at | 2   | 0.0001985 |
| Ktn1         | kinectin 1       | 1455434_a_at | 2   | 0.0002003 |
| Arf6         | ADP-ribosylati   | 1418824_at   | 2.5 | 0.0002026 |
| Tmed5        | transmembrar     | 1431789_s_at | 2   | 0.0002052 |
| Pura         | Purine rich ele  | 1456898_at   | 2.5 | 0.0002072 |
| 0610041E09Ri | RIKEN cDNA 0     | 1423208_at   | 2   | 0.0002085 |
| Slc12a2      | solute carrier 1 | 1448780_at   | 2   | 0.00021   |
| Eif1a        | eukaryotic tra   | 1424343_a_at | 2   | 0.0002109 |
| 2810407C02R  | RIKEN cDNA 2     | 1453726_s_at | 2   | 0.000211  |
| 2410042D21R  | RIKEN cDNA 2     | 1426495_at   | 2   | 0.0002112 |
| Trpm7        | transient rece   | 1416799_at   | 2.5 | 0.0002118 |
| Gm542        | gene model 5'    | 1434513_at   | 2   | 0.0002125 |
| Atp6v0d2     | ATPase, H+ tr    | 1444176_at   | 3.3 | 0.0002139 |
| Nxt2         | nuclear transp   | 1456599_at   | 2.5 | 0.0002177 |
| Psip1        | PC4 and SFRS     | 1417166_at   | 2   | 0.0002178 |
| BC016423     | CDNA sequenc     | 1418772_at   | 2.5 | 0.0002182 |
| 2510006C20R  | RIKEN cDNA 2     | 1419074_at   | 2   | 0.0002215 |
| Mcpt1        | mast cell prot   | 1422352_at   | 2   | 0.0002232 |
| C79407       | expressed seq    | 1458374_at   | 2   | 0.0002233 |
| Rnf138       | ring finger pro  | 1454064_a_at | 2   | 0.0002248 |
| 4933421E11Ri | RIKEN cDNA 4     | 1428162_at   | 2   | 0.0002251 |
| Mbni2        | muscleblind-lil  | 1433754_at   | 2   | 0.0002254 |
| Vbp1         | von Hippel-Lin   | 1421750_a_at | 2.5 | 0.0002262 |
| Chm          | choroidermia     | 1439824_at   | 2   | 0.0002287 |
| Cenpe        | centromere pr    | 1439040_at   | 2.5 | 0.0002302 |

|              |                 |              |     |           |
|--------------|-----------------|--------------|-----|-----------|
| Strn3        | striatin, calmo | 1423535_at   | 2   | 0.0002305 |
| AA407452     | EST AA407452    | 1456790_at   | 2.5 | 0.0002317 |
| Fxr1h        | fragile X ment  | 1452247_at   | 2   | 0.0002333 |
| Eea1         | Early endosom   | 1438045_at   | 2   | 0.0002365 |
| Shcbp1       | Shc SH2-dom     | 1416299_at   | 2   | 0.0002373 |
|              | Transcribed lo  | 1438695_at   | 2   | 0.0002388 |
| Ipo7         | importin 7      | 1454955_at   | 2   | 0.0002394 |
| Sh3bgrl      | SH3-binding d   | 1428107_at   | 2.5 | 0.0002424 |
| Narg3        | NMDA recepto    | 1434860_at   | 2   | 0.0002458 |
| Rock1        | Rho-associat    | 1423445_at   | 3.3 | 0.000246  |
| BC020077     | cDNA sequenc    | 1451349_at   | 2   | 0.0002475 |
| Zdhhc21      | zinc finger, DH | 1429488_at   | 2   | 0.0002505 |
| Plaa         | phospholipase   | 1435001_at   | 2   | 0.0002515 |
| Thoc1        | THO complex     | 1424641_a_at | 2   | 0.0002528 |
| Narg1        | NMDA recepto    | 1418024_at   | 2   | 0.0002538 |
| Tes3-ps      | testis derived  | 1455054_a_at | 2   | 0.000254  |
| 5830426I05Ri | RIKEN cDNA 5    | 1417926_at   | 2   | 0.0002578 |
|              |                 | 1455096_at   | 2   | 0.0002604 |
| Plk4         | polo-like kinas | 1426580_at   | 2   | 0.0002634 |
| Pik3ca       | phosphatidylin  | 1429434_at   | 2.5 | 0.000269  |
| A030012M09R  | RIKEN cDNA A    | 1435634_at   | 2   | 0.0002696 |
| Asx12        | Additional sex  | 1460597_at   | 2   | 0.0002716 |
| MGI:2675296  | HCF-binding tr  | 1452857_at   | 2.5 | 0.0002733 |
| Plk4         | polo-like kinas | 1419838_s_at | 2   | 0.0002757 |
| Cd2ap        | CD2-associate   | 1420908_at   | 3.3 | 0.0002779 |
|              |                 | 1417861_at   | 2   | 0.000279  |
|              |                 | 1434284_at   | 2   | 0.0002806 |
| D330037H05R  | RIKEN cDNA D    | 1439010_at   | 2   | 0.0002812 |
| Rnpc3        | RNA-binding r   | 1437461_s_at | 2   | 0.0002829 |
| 5730507H05R  | RIKEN cDNA 5    | 1429171_a_at | 2   | 0.0002835 |
| Zfp51        | zinc finger pro | 1424706_at   | 2   | 0.0002838 |
| Mbnl3        | muscleblind-lil | 1442549_at   | 2   | 0.0002878 |
| Stk3         | serine/threoni  | 1418512_at   | 2   | 0.0002896 |
| Gabpa        | GA repeat bin   | 1450664_at   | 2   | 0.0002924 |

|              |                  |              |     |           |
|--------------|------------------|--------------|-----|-----------|
| Hrpt2        | hyperparathyr    | 1443986_at   | 2   | 0.000293  |
| Smc5l1       | SMC5 structur    | 1426270_at   | 2   | 0.0002945 |
|              |                  | 1419905_s_at | 2.5 | 0.0002983 |
| 1110030H10R  | RIKEN cDNA 1     | 1460335_at   | 2.5 | 0.0002987 |
| B230337E12R  | RIKEN cDNA B     | 1434671_at   | 2.5 | 0.0002993 |
| Zfp367       | zinc finger pro  | 1433623_at   | 2   | 0.0003002 |
| Lin7c        | lin 7 homolog    | 1450937_at   | 2   | 0.0003022 |
| Ell2         | elongation fac   | 1450744_at   | 2   | 0.0003024 |
| Ube2v2       | ubiquitin-conj   | 1417983_a_at | 2.5 | 0.0003059 |
| Zfp644       | zinc finger pro  | 1419984_s_at | 2.5 | 0.0003104 |
| Sfrs7        | splicing factor, | 1424033_at   | 2   | 0.0003118 |
| Lin7c        | lin 7 homolog    | 1423322_at   | 2   | 0.0003122 |
| Scin         | scinderin        | 1450276_a_at | 2   | 0.0003176 |
| Ssb          | Sjogren syndr    | 1416421_a_at | 2.5 | 0.0003236 |
| 1700009P03Ri | RIKEN cDNA 1     | 1426419_at   | 2   | 0.000324  |
| Eif5         | eukaryotic tra   | 1454663_at   | 2   | 0.0003252 |
| D330037H05R  | RIKEN cDNA C     | 1455102_at   | 2   | 0.0003256 |
| Abce1        | ATP-binding c    | 1416015_s_at | 2   | 0.0003273 |
| Tfpi         | tissue factor p  | 1451791_at   | 2   | 0.0003275 |
| Nsbp1        | nucleosome bi    | 1418152_at   | 2.5 | 0.0003275 |
|              |                  | 1433978_at   | 2   | 0.0003279 |
| 6330403M23R  | RIKEN cDNA 6     | 1455538_at   | 2.5 | 0.000328  |
| BC004690     | cDNA sequenc     | 1425642_at   | 2   | 0.0003286 |
|              |                  | 1417770_s_at | 2.5 | 0.00033   |
| Gnpda2       | glucosamine-6    | 1426524_at   | 2   | 0.0003331 |
| 4632419I22Ri | RIKEN cDNA 4     | 1436247_at   | 2   | 0.0003333 |
| 4931428D14R  | RIKEN cDNA 4     | 1451442_at   | 2   | 0.0003364 |
| Suz12        | suppressor of    | 1452364_at   | 2   | 0.0003365 |
| Rpgr         | retinitis pigme  | 1427467_a_at | 2   | 0.0003415 |
| Prrx1        | paired related   | 1425528_at   | 2   | 0.0003421 |
|              |                  | 1450938_at   | 2   | 0.0003427 |
| Matr3        | matrin 3         | 1450874_at   | 2.5 | 0.0003446 |
| Mak3         | Mak3 homolog     | 1428409_at   | 2   | 0.0003537 |
|              |                  | 1434618_at   | 2   | 0.0003549 |

|             |                              |     |           |
|-------------|------------------------------|-----|-----------|
|             | 1417769_at                   | 2.5 | 0.0003556 |
| Sdccag1     | serologically d 1429327_at   | 2   | 0.000356  |
| Cdc27       | cell division cy 1433848_at  | 2.5 | 0.0003568 |
| Nol5        | nucleolar prot 1450986_at    | 2   | 0.0003568 |
| 2410129H14R | RIKEN cDNA 2 1434663_at      | 2   | 0.0003608 |
| Tloc1       | translocation p 1455698_at   | 2.5 | 0.000362  |
| Socs6       | suppressor of 1435492_at     | 2.5 | 0.0003625 |
| 1200009K13R | RIKEN cDNA 1 1418563_at      | 2   | 0.0003628 |
| Prei3       | preimplantatio 1423167_at    | 2   | 0.0003687 |
| 2600011C06R | RIKEN cDNA 2 1428907_at      | 2   | 0.0003698 |
| Mmp9        | matrix metallo 1416298_at    | 2   | 0.0003717 |
| Ifi202b     | interferon acti 1421551_s_at | 2.5 | 0.0003725 |
| MGI:2443930 | Mblk1-related 1443779_s_at   | 2.5 | 0.0003749 |
| Bmi1        | B lymphoma M 1448733_at      | 2.5 | 0.0003771 |
|             | 1437039_at                   | 2   | 0.0003799 |
| Cwf19l2     | CWF19-like 2, 1456019_at     | 2.5 | 0.0003815 |
| 5730406M06R | RIKEN cDNA 5 1437041_at      | 2   | 0.0003825 |
| 2610030H06R | RIKEN cDNA 2 1434232_a_at    | 2   | 0.000383  |
| Tes3-ps /// | Testis derived 1452079_s_at  | 2.5 | 0.0003833 |
| 1500005K14R | RIKEN cDNA 1 1429764_at      | 0.6 | 0.0003868 |
| 2610030H06R | RIKEN cDNA 2 1434233_at      | 2   | 0.0003903 |
| Zfp265      | zinc finger pro 1454652_at   | 2   | 0.0003907 |
| 1200009K13R | RIKEN cDNA 1 1418565_at      | 2   | 0.0003923 |
| 2700089E24R | RIKEN cDNA 2 1453208_at      | 1.7 | 0.0003923 |
| Cpsf6       | cleavage and p 1428234_at    | 2   | 0.0003934 |
| 5730601F06R | RIKEN cDNA 5 1434084_at      | 1.7 | 0.0003958 |
| 1110001C20R | RIKEN cDNA 1 1437288_at      | 2   | 0.000397  |
| Aebp2       | AE binding prc 1437743_at    | 2   | 0.000398  |
| Herc5       | Hect domain a 1438037_at     | 2   | 0.0004027 |
| Tyki        | thymidylate ki 1450484_a_at  | 2   | 0.0004065 |
| AI461788    | expressed seq 1435181_at     | 2   | 0.0004066 |
| Rap1a       | RAS-related p 1424139_at     | 2   | 0.0004092 |
| Ghr         | growth hormo 1417962_s_at    | 1.7 | 0.0004101 |
|             | 1450113_at                   | 2   | 0.0004113 |



|             |                 |              |     |           |
|-------------|-----------------|--------------|-----|-----------|
| Matr3       | matrin 3        | 1434888_a_at | 2   | 0.0004162 |
| Ube3a       | Ubiquitin prote | 1437354_at   | 2.5 | 0.0004174 |
| Hrb2        | HIV-1 Rev bin   | 1452658_at   | 2   | 0.0004185 |
|             | Transcribed loc | 1455817_x_at | 2.5 | 0.0004188 |
| Sdccag1     | serologically d | 1429446_at   | 2   | 0.0004206 |
| Rsb1        | rosbin, round   | 1435174_at   | 1.7 | 0.000422  |
| Mpp5        | membrane prc    | 1421064_at   | 1.7 | 0.0004231 |
| Zic5        | Zinc finger prc | 1456219_at   | 2   | 0.0004233 |
| Depdc1a     | DEP domain c    | 1424292_at   | 2.5 | 0.0004269 |
| Smarca5     | SWI/SNF relat   | 1424207_at   | 2   | 0.0004288 |
| Pkn2        | protein kinase  | 1437295_at   | 2   | 0.0004329 |
| Fxr1h       | fragile X ment  | 1442059_at   | 2   | 0.0004346 |
|             |                 | 1437950_at   | 1.7 | 0.0004361 |
| 1700013G20R | RIKEN cDNA 1    | 1452972_at   | 1.7 | 0.000446  |
| Socs4       | suppressor of   | 1455142_at   | 2.5 | 0.0004512 |
| Abce1       | ATP-binding c   | 1416014_at   | 1.7 | 0.0004513 |
| 3526402H21R | RIKEN cDNA 3    | 1428755_at   | 2   | 0.0004571 |
| Tax1bp1     | Tax1 (human     | 1420174_s_at | 2   | 0.0004619 |
| 5730469D23R | RIKEN cDNA 5    | 1428945_at   | 1.7 | 0.0004623 |
| B230219D22R | RIKEN cDNA B    | 1424005_at   | 2   | 0.0004628 |
| Vcpip1      | valosin contair | 1456607_at   | 2   | 0.0004628 |
| Ppp1r12a    | protein phospl  | 1437735_at   | 1.7 | 0.0004673 |
| AI316828    | expressed seq   | 1456398_at   | 2   | 0.0004679 |
| Suv39h2     | suppressor of   | 1422979_at   | 2.5 | 0.0004696 |
| Kif11       | kinesin family  | 1452315_at   | 1.7 | 0.0004724 |
| Yme1l1      | YME1-like 1 (S  | 1450954_at   | 2   | 0.0004764 |
| Zfp238      | zinc finger pro | 1417010_at   | 2   | 0.0004768 |
| Ube1c       | ubiquitin-activ | 1417202_s_at | 2.5 | 0.0004771 |
| Col5a2      | procollagen, t  | 1450625_at   | 2.5 | 0.0004773 |
| 6030408C04R | RIKEN cDNA 6    | 1455355_at   | 1.7 | 0.0004829 |
| 9130217G22R | RIKEN cDNA 9    | 1442033_at   | 0.5 | 0.0004862 |
| BC030336    | cDNA sequenc    | 1434075_at   | 2   | 0.0004864 |
|             |                 | 1435333_at   | 2   | 0.0004866 |
| Cav2        | caveolin 2      | 1417327_at   | 2   | 0.0004871 |

|              |                             |     |           |
|--------------|-----------------------------|-----|-----------|
| Zdhhc20      | zinc finger, DH1451437_at   | 1.7 | 0.0004891 |
| Cd2ap        | CD2-associate 1420906_at    | 2   | 0.0004916 |
| Mmp9         | matrix metallo 1448291_at   | 2   | 0.0004925 |
|              | 1427334_s_at                | 2   | 0.0004934 |
| Yme1l1       | YME1-like 1 (S1423361_at    | 2.5 | 0.0005011 |
| Tia1         | cytotoxic gran 1416814_at   | 2   | 0.0005016 |
| Bub1         | budding unin 1424046_at     | 2   | 0.0005076 |
| Rnpc2        | RNA-binding r 1426671_a_at  | 2   | 0.0005086 |
| C1galt1c1    | C1GALT1-spec 1416655_at     | 2   | 0.000509  |
| Eif2s2       | eukaryotic tra 1456617_a_at | 2   | 0.0005098 |
|              | Transcribed lo 1458820_at   | 2   | 0.00051   |
| Arhgap5      | Rho GTPase ac 1450897_at    | 2.5 | 0.0005111 |
| Ranbp2       | RAN binding p 1422621_at    | 2   | 0.0005127 |
| Jmjd1c       | jumonji domai 1426900_at    | 1.7 | 0.0005184 |
| D3Erttd300e  | DNA segment, 1435905_at     | 2   | 0.000519  |
| Hdac2        | histone deacet 1449080_at   | 1.7 | 0.0005208 |
| 4732486I23Ri | RIKEN cDNA 4 1427151_at     | 2   | 0.0005222 |
| Lin9         | lin-9 homolog 1428639_at    | 1.7 | 0.0005222 |
| 5730427N09R  | RIKEN cDNA 5 1423131_at     | 2   | 0.0005239 |
| Gmfb         | glia maturatio 1417069_a_at | 1.7 | 0.0005249 |
| 1700029F09Ri | RIKEN cDNA 1 1428593_at     | 2   | 0.0005269 |
| Ccnc         | Cyclin C 1428570_at         | 2   | 0.0005296 |
| Tm7sf4       | transmembrar 1431970_at     | 2.5 | 0.0005306 |
| 1810013L24Ri | RIKEN cDNA 1 1434613_at     | 2   | 0.000541  |
| Casp8ap2     | caspase 8 ass 1449217_at    | 2   | 0.0005453 |
|              | Transcribed lo 1436413_at   | 2   | 0.0005462 |
| Ythdf3       | YTH domain fa 1426840_at    | 2.5 | 0.0005542 |
| Fkbp3        | FK506 binding 1416858_a_at  | 2.5 | 0.0005562 |
| Trpm7        | transient rece 1416800_at   | 2   | 0.000557  |
| Rbm27        | RNA binding r 1456058_at    | 2   | 0.000558  |
| Cdc27        | cell division cy 1454739_at | 1.7 | 0.0005597 |
| Nol8         | nucleolar prot 1428950_s_at | 2   | 0.0005644 |
| Sgol2        | shugoshin-like 1437370_at   | 2   | 0.0005655 |
| Zfp292       | zinc finger pro 1419574_at  | 1.7 | 0.0005664 |

|              |                                            |              |     |           |
|--------------|--------------------------------------------|--------------|-----|-----------|
| Car2         | carbonic anhydrase 2                       | 1448752_at   | 3.3 | 0.0005673 |
| Zfp386       | zinc finger protein 386                    | 1421139_a_at | 2   | 0.00057   |
| Kitl         | kit ligand                                 | 1448117_at   | 2   | 0.0005704 |
| Styx         | phosphoserine phosphatase                  | 1429710_at   | 2   | 0.0005721 |
| Tbc1d12      | TBC1D12                                    | 1435675_at   | 2   | 0.0005742 |
| 2310002J21Ri | RIKEN cDNA 2310002J21Ri                    | 1452883_a_at | 2   | 0.0005755 |
| Xpo1         | exportin 1, CR                             | 1418442_at   | 1.7 | 0.0005776 |
| BC043476     | cDNA sequence BC043476                     | 1438349_at   | 2   | 0.000582  |
| Fusip1       | FUS interacting protein 1                  | 1418527_a_at | 1.7 | 0.0005822 |
| Usp16        | ubiquitin specific protease 16             | 1431951_a_at | 1.7 | 0.0005827 |
| 1200009B18R  | RIKEN cDNA 1200009B18R                     | 1424462_at   | 2   | 0.0005858 |
| Steap2       | Six transmembrane protein 2                | 1438773_at   | 2.5 | 0.0005882 |
| 3110048L19Ri | RIKEN cDNA 3110048L19Ri                    | 1455433_at   | 2.5 | 0.0005883 |
| Npnt         | nephronectin                               | 1452106_at   | 2   | 0.0005887 |
| Ect2         | ect2 oncogene                              | 1419513_a_at | 2.5 | 0.0005933 |
| D130060C09R  | RIKEN cDNA D130060C09R                     | 1433779_at   | 1.7 | 0.0005952 |
| 4631424J17Ri | RIKEN cDNA 4631424J17Ri                    | 1453028_at   | 2.5 | 0.0005955 |
| 4930429M06R  | RIKEN cDNA 4930429M06R                     | 1429728_at   | 1.7 | 0.000598  |
| Zfp281       | zinc finger protein 281                    | 1426377_at   | 1.7 | 0.0006016 |
| Eif5         | eukaryotic translation initiation factor 5 | 1433631_at   | 1.7 | 0.0006097 |
| Haghl        | hydroxyacylglutathione lyase               | 1429958_x_at | 0.6 | 0.0006101 |
| 7-Mar        | membrane-associated protein 7              | 1420609_at   | 2   | 0.0006129 |
|              |                                            | 1434243_s_at | 2   | 0.0006136 |
| 3100002L24Ri | RIKEN cDNA 3100002L24Ri                    | 1426558_x_at | 2   | 0.0006147 |
| Luc7l2       | LUC7-like 2 (S)                            | 1437761_at   | 1.7 | 0.0006199 |
| Rpe          | ribulose-5-phosphate carboxylase           | 1416706_at   | 1.7 | 0.0006224 |
| Bmi1         | B lymphoma myeloma inhibitor 1             | 1417493_at   | 2   | 0.0006244 |
| Kif11        | kinesin family 11                          | 1435306_a_at | 1.7 | 0.0006256 |
| 2810455D13R  | RIKEN cDNA 2810455D13R                     | 1435947_at   | 2   | 0.0006279 |
| Prss35       | protease, serine 35                        | 1434195_at   | 2   | 0.0006282 |
| Orc4l        | origin recognition complex 4-like 1        | 1453804_a_at | 2   | 0.0006297 |
| MGI:1927354  | nuclear DNA binding protein                | 1448505_at   | 2   | 0.0006322 |
|              | 0 day neonate                              | 1437375_at   | 2   | 0.0006331 |
| Sacs         | sacsin                                     | 1434958_at   | 2   | 0.0006362 |

|                                       |     |           |
|---------------------------------------|-----|-----------|
| 1200009K13R RIKEN cDNA 1 1440195_at   | 2   | 0.0006468 |
| Tcte1l t-complex-ass 1449928_at       | 2.5 | 0.0006477 |
| Tcea1 transcription e 1419257_at      | 1.7 | 0.0006525 |
| Pvrl3 poliovirus rece 1448673_at      | 2   | 0.0006536 |
| Pum2 pumilio 2 (Dro 1418017_at        | 2   | 0.0006563 |
| Tcte1l t-complex-ass 1459854_s_at     | 2   | 0.0006565 |
| Chek1 checkpoint kin 1450677_at       | 2.5 | 0.000659  |
| Slc35a3 solute carrier 11429649_at    | 2   | 0.0006593 |
| 1200009B18R RIKEN cDNA 1 1453796_a_at | 2   | 0.0006626 |
| 3230402J05Ri RIKEN cDNA 3 1454831_at  | 1.7 | 0.0006664 |
| Zfpn1a5 zinc finger pro 1429431_at    | 1.7 | 0.0006674 |
| Pdzk8 PDZ domain c 1435562_at         | 1.7 | 0.000668  |
| Actr6 ARP6 actin-rel 1428502_at       | 1.7 | 0.0006686 |
| Eif2s2 eukaryotic tra 1417712_at      | 1.7 | 0.00067   |
| Snx16 sorting nexin 1438803_s_at      | 1.7 | 0.0006722 |
| Stch stress 70 prot 1433772_at        | 1.7 | 0.0006754 |
| 5330414D10R RIKEN cDNA 5 1427075_s_at | 1.7 | 0.00068   |
| Bcap29 B-cell receptor 1417077_at     | 1.7 | 0.0006824 |
| Hccs holocytochrom 1420890_at         | 1.7 | 0.0006864 |
| Ccnh cyclin H 1418585_at              | 2   | 0.0006875 |
| Narg1 NMDA recepto 1435139_at         | 1.7 | 0.0006897 |
| Calmbp1 calmodulin bin 1422814_at     | 1.7 | 0.0006898 |
| Acsl4 acyl-CoA synt 1433531_at        | 1.7 | 0.0006908 |
| Slc6a2 solute carrier 11460129_at     | 0.5 | 0.0006947 |
| Fusip1 FUS interactin 1449121_at      | 2   | 0.000696  |
| Atad2 ATPase family, 1436174_at       | 1.7 | 0.0006968 |
| Scoc short coiled-cc 1416267_at       | 2   | 0.0006973 |
| Clk4 CDC like kinas 1427663_a_at      | 1.7 | 0.0006984 |
| Mpp6 membrane prc 1449348_at          | 2   | 0.0006996 |
| 2700082D03R RIKEN cDNA 2 1453162_at   | 2   | 0.0006999 |
| Lnp limb and neur 1453035_at          | 2   | 0.000702  |
| 4921533L14Ri RIKEN cDNA 4 1453122_at  | 1.7 | 0.0007054 |
| Ppp1cb protein phosp 1426205_at       | 2   | 0.0007169 |
| Pik3ca phosphatidylin 1453134_at      | 1.7 | 0.000723  |

|             |                 |              |     |           |
|-------------|-----------------|--------------|-----|-----------|
| Ptp4a1      | protein tyrosin | 1449322_at   | 1.7 | 0.0007238 |
| Phf6        | PHD finger prc  | 1454625_at   | 2   | 0.0007304 |
| Zfp644      | zinc finger pro | 1429623_at   | 2.5 | 0.0007324 |
| Tbc1d15     | TBC1 domain     | 1416060_at   | 1.7 | 0.0007409 |
| Cfl2        | cofilin 2, musc | 1418066_at   | 2   | 0.0007439 |
| Oazin       | ornithine deca  | 1450714_at   | 1.7 | 0.0007461 |
| Rpe         | ribulose-5-phc  | 1416705_at   | 2   | 0.0007466 |
|             |                 | 1429458_at   | 2   | 0.0007472 |
| Mbtps2      | membrane-bo     | 1436883_at   | 1.7 | 0.000751  |
| Zbtb33      | zinc finger anc | 1434022_at   | 2   | 0.0007512 |
| Smarca5     | SWI/SNF relat   | 1424206_at   | 1.7 | 0.0007553 |
|             |                 | 1416118_at   | 2   | 0.0007567 |
| Top2b       | topoisomerase   | 1416731_at   | 1.7 | 0.0007656 |
| Prrx1       | paired related  | 1439774_at   | 2.5 | 0.000771  |
| Fxr1h       | fragile X ment  | 1417598_a_at | 1.7 | 0.0007725 |
| Cetn3       | centrin 3       | 1417239_at   | 2   | 0.0007795 |
| Itgb3bp     | integrin beta   | 1456097_a_at | 1.7 | 0.0007862 |
| Col11a1     | procollagen, t  | 1418599_at   | 5   | 0.0007928 |
| 1810012N18R | RIKEN cDNA 1    | 1427131_s_at | 1.7 | 0.0007947 |
| Ifi203      | interferon acti | 1448775_at   | 1.7 | 0.0007958 |
| Trim23      | tripartite moti | 1456089_at   | 2   | 0.0007969 |
| BC023882    | cDNA sequenc    | 1423919_at   | 1.7 | 0.0007999 |
| Sfrp4       | secreted frizzl | 1451031_at   | 2   | 0.0008029 |
|             |                 | 1460563_at   | 1.7 | 0.0008086 |
| Usp9x       | ubiquitin speci | 1450037_at   | 1.7 | 0.0008104 |
| Hrb2        | HIV-1 Rev bin   | 1420139_s_at | 2   | 0.0008181 |
| Papd4       | PAP associate   | 1433568_at   | 1.7 | 0.0008209 |
| Nek1        | NIMA (never in  | 1434267_at   | 1.7 | 0.0008252 |
| Chek1       | checkpoint kin  | 1449708_s_at | 1.7 | 0.0008262 |
| BC003267    | cDNA sequenc    | 1460369_at   | 2.5 | 0.0008278 |
| 1200008O12R | RIKEN cDNA 1    | 1452242_at   | 1.7 | 0.0008345 |
| Atad1       | ATPase family,  | 1448763_at   | 1.7 | 0.0008358 |
| Cpeb4       | cytoplasmic pc  | 1420618_at   | 2   | 0.0008362 |
| Paip1       | polyadenylate   | 1451740_at   | 1.7 | 0.0008431 |

|                 |                              |     |           |
|-----------------|------------------------------|-----|-----------|
| Xpo1            | exportin 1, CR 1418443_at    | 1.7 | 0.0008434 |
| MGI:1915703     | GPI-anchored 1453022_at      | 0.6 | 0.0008461 |
| Acbd5           | acyl-Coenzyme 1428236_at     | 2   | 0.0008482 |
| Dnajc3          | DnaJ (Hsp40) 1433887_at      | 1.7 | 0.0008533 |
| Dnm1l           | dynamamin 1-like 1428086_at  | 1.7 | 0.0008552 |
| Rasa1           | RAS p21 prote 1426476_at     | 2   | 0.0008558 |
| Fbxo30          | F-box protein 1453136_at     | 2.5 | 0.0008576 |
| Ube3a           | ubiquitin prote 1416681_at   | 2   | 0.0008594 |
| Tomm70a         | translocase of 1426675_at    | 1.7 | 0.0008597 |
| Gmps            | guanine monp 1435656_at      | 2   | 0.0008601 |
| Nmd3            | NMD3 homolo 1448133_at       | 2   | 0.0008693 |
| Usp45           | ubiquitin speci 1427991_s_at | 2   | 0.0008758 |
|                 | Transcribed lo 1435574_at    | 2.5 | 0.0008915 |
| Clca1 /// Clca2 | chloride chann 1460259_s_at  | 3.3 | 0.000897  |
|                 | 1457042_at                   | 1.7 | 0.0008981 |
| Hspca           | heat shock prc 1426645_at    | 1.7 | 0.0009047 |
| Oxr1            | oxidation resis 1418501_a_at | 1.7 | 0.0009071 |
| Eif3s1          | eukaryotic tra 1452052_s_at  | 1.7 | 0.0009093 |
| Steap2          | six transmemt 1446071_at     | 2.5 | 0.0009106 |
| Hsp105          | heat shock prc 1425993_a_at  | 1.7 | 0.0009115 |
| Eif3s1          | eukaryotic tra 1426394_at    | 1.7 | 0.0009128 |
| Plekha4         | pleckstrin hor 1426013_s_at  | 0.6 | 0.0009236 |
| Ctsk            | cathepsin K 1450652_at       | 2.5 | 0.0009246 |
| Cacybp          | calcyclin bindi 1452047_at   | 2   | 0.0009255 |
| Bdh             | 3-hydroxybuty 1452257_at     | 2   | 0.0009317 |
| Lin7c           | lin 7 homolog 1449262_s_at   | 2   | 0.000932  |
| Kif5b           | kinesin family 1418427_at    | 1.7 | 0.0009345 |
| 2610101J03Ri    | RIKEN cDNA 2 1434941_s_at    | 2   | 0.0009362 |
| Casp12          | caspase 12 1449297_at        | 1.7 | 0.0009406 |
| 5730446C15R     | RIKEN cDNA 5 1454724_x_at    | 1.7 | 0.0009545 |
| Arid4b          | AT rich interac 1435768_at   | 1.7 | 0.0009545 |
| 1110067D22R     | RIKEN cDNA 1 1424318_at      | 1.7 | 0.000957  |
| Man2b2          | mannosidase ;AFFX-18SRNAI    | 2   | 0.000957  |
| Mib1            | mindbomb hor 1454740_at      | 2   | 0.0009595 |

|             |                 |              |     |           |
|-------------|-----------------|--------------|-----|-----------|
|             | Transcribed lo  | 1460085_at   | 2   | 0.0009607 |
| Ddx26       | DEAD/H (Asp-    | 1423275_at   | 2   | 0.0009729 |
| Ankrd32     | ankyrin repeat  | 1423577_at   | 2.5 | 0.0009758 |
| A430041B07R | RIKEN cDNA A    | 1434843_at   | 1.7 | 0.0009767 |
| Usp33       | ubiquitin speci | 1426709_a_at | 2   | 0.0009791 |
| Gmfb        | glia maturatio  | 1431686_a_at | 2   | 0.0009842 |
| 6330441O12R | RIKEN cDNA 6    | 1438736_at   | 2   | 0.0009943 |
| Miz1        | Msx-interactin  | 1428725_at   | 1.7 | 0.0009974 |
| Narg1       | NMDA recepto    | 1418023_at   | 2   | 0.0009983 |
